# Supplementary material for: Prevalence and determinants of pregnancy termination in Ethiopia: a systematic review and meta-analysis
Source: PubMed Central journal article supplement — BMJ Open. 2024 Mar 13;14(3):e073799. doi: 10.1136/bmjopen-2023-073799 (PMC10941161; doi:10.1136/bmjopen-2023-073799), 2024-03-13
Supplement: bmjopen-2023-073799.draft_revisions.pdf [file bmjopen-2023-073799.draft_revisions.pdf]

# BMJ Open

BMJ Open is committed to open peer review. As part of this commitment we make the peer review history of every article we publish publicly available.

When an article is published we post the peer reviewers' comments and the authors' responses online. We also post the versions of the paper that were used during peer review. These are the versions that the peer review comments apply to.

The versions of the paper that follow are the versions that were submitted during the peer review process. They are not the versions of record or the final published versions. They should not be cited or distributed as the published version of this manuscript.

BMJ Open is an open access journal and the full, final, typeset and author-corrected version of record of the manuscript is available on our site with no access controls, subscription charges or pay-per-view fees (<http://bmjopen.bmj.com>).

If you have any questions on BMJ Open's open peer review process please email [info.bmjopen@bmj.com](mailto:info.bmjopen@bmj.com)

# BMJ Open

## Prevalence and predictors of pregnancy termination in Ethiopia: A systematic review and meta-analysis

|                               |                                                                                                                                                                                                                                                   |
|-------------------------------|---------------------------------------------------------------------------------------------------------------------------------------------------------------------------------------------------------------------------------------------------|
| Journal:                      | <i>BMJ Open</i>                                                                                                                                                                                                                                   |
| Manuscript ID                 | bmjopen-2023-073799                                                                                                                                                                                                                               |
| Article Type:                 | Original research                                                                                                                                                                                                                                 |
| Date Submitted by the Author: | 20-Mar-2023                                                                                                                                                                                                                                       |
| Complete List of Authors:     | Kumsa, Henok; Woldia University<br>Misl, Esuyawkal; Woldia University, Midwifery<br>Aragie, Mulugeta; Woldia University, Midwifery<br>Kidie, Atitegeb; Woldia University<br>Hailu, Tilahun; Woldia University<br>tenaw, lebeza; Woldia University |
| Keywords:                     | Adolescent, Public health < INFECTIOUS DISEASES, Sexual and Gender Minorities                                                                                                                                                                     |
|                               |                                                                                                                                                                                                                                                   |

SCHOLARONE™  
Manuscripts

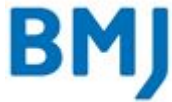

I, the Submitting Author has the right to grant and does grant on behalf of all authors of the Work (as defined in the below author licence), an exclusive licence and/or a non-exclusive licence for contributions from authors who are: i) UK Crown employees; ii) where BMJ has agreed a CC-BY licence shall apply, and/or iii) in accordance with the terms applicable for US Federal Government officers or employees acting as part of their official duties; on a worldwide, perpetual, irrevocable, royalty-free basis to BMJ Publishing Group Ltd ("BMJ") its licensees and where the relevant Journal is co-owned by BMJ to the co-owners of the Journal, to publish the Work in this journal and any other BMJ products and to exploit all rights, as set out in our [licence](#).

The Submitting Author accepts and understands that any supply made under these terms is made by BMJ to the Submitting Author unless you are acting as an employee on behalf of your employer or a postgraduate student of an affiliated institution which is paying any applicable article publishing charge ("APC") for Open Access articles. Where the Submitting Author wishes to make the Work available on an Open Access basis (and intends to pay the relevant APC), the terms of reuse of such Open Access shall be governed by a Creative Commons licence – details of these licences and which [Creative Commons](#) licence will apply to this Work are set out in our licence referred to above.

Other than as permitted in any relevant BMJ Author's Self Archiving Policies, I confirm this Work has not been accepted for publication elsewhere, is not being considered for publication elsewhere and does not duplicate material already published. I confirm all authors consent to publication of this Work and authorise the granting of this licence.

1  
2  
3 **Prevalence and predictors of pregnancy termination in Ethiopia: A systematic**  
4 **review and meta-analysis**  
5  
6

7  
8 Henok Kumsa<sup>1</sup>, Esuyawkal Kasahun Mislu<sup>1</sup>, Mulugeta Wedaje Aragie<sup>1</sup>, Atitegeb Kidie Abera<sup>2</sup>,  
9 Tilahun Hailu<sup>2</sup>, and Lebeza Alemu Tenaw<sup>2</sup>  
10  
11

12 *Affiliations*  
13

14  
15 <sup>1</sup>School of Midwifery, College of Health Science, Woldia University, Ethiopia  
16

17 <sup>2</sup> School of Public health, College of Health Science, Woldia University, Ethiopia  
18  
19

20 Email Address

21 **HK:** [henokkumsa@gmail.com](mailto:henokkumsa@gmail.com)  
22

23 **EKM:** [esuyawkalmislu@gmail.com](mailto:esuyawkalmislu@gmail.com)  
24

25 **MWA:** [mulewodaje@gmail.com](mailto:mulewodaje@gmail.com)  
26

27 **AKA:** [atitegebabera@gmail.com](mailto:atitegebabera@gmail.com)  
28

29 **TH:** [lemaryam01@gmail.com](mailto:lemaryam01@gmail.com)  
30

31 **LAT:** [lebezaa@gmail.com](mailto:lebezaa@gmail.com)  
32

33 \*Corresponding author: Lebeza Alemu Tenaw  
34  
35

36 Email: [lebezaa@gmail.com](mailto:lebezaa@gmail.com)  
37  
38  
39  
40  
41  
42  
43  
44  
45  
46  
47  
48  
49  
50  
51  
52  
53  
54  
55  
56  
57  
58  
59  
60

## Abstract

**Objectives:** this systematic review and meta-analysis aimed to assess the prevalence of pregnancy termination and its predictors in Ethiopia.

**Participants:** A systematic review and meta-analysis of studies published from January 2004 to January 2023. PubMed, EMBASE, Medline, and other search engines were used to retrieve relevant articles. Thirty-three full articles were included in this review.

**Primary and Secondary Measures:** The p-value for  $I^2$  statistics of 0.05 was used to determine the presence of heterogeneity. Publication bias was assessed using the Egger regression asymmetry test and the Duval and Tweedie nonparametric trim and fill analysis.

**Results:** The overall pooled prevalence of termination of pregnancy among women in Ethiopia was 21.52% (95% CI: 15.01, 28.03). The meta-analysis included studies with significant heterogeneity:  $I^2 = 99.8\%$ ,  $p = 0.000$ . The Egger's regression asymmetry test also showed significant publication bias, a p-value 0.001. Sub-group analysis showed that the pooled prevalence of abortion was highest in the Oromia region (35.60%; 95% CI: 28.86, 42.34) and among gynecological admitted patients (60.60%; 95% CI: 59.47, 61.73). Women who were students who had their first sexual initiation before the age of 18, had irregular menstrual bleeding, and had multiple sexual partners were significantly associated with pregnancy termination, according to the pooled meta-analysis.

**Conclusions:** One in five women terminated their pregnancies, which is higher than in other sub-Saharan African countries. Being a student, irregular menstrual bleeding, early initiation of sexual intercourse, and multiple sexual partners were predictors of pregnancy termination.

### **Strength**

- Both published and unpublished literature are included in this study.
- The authors extracted the whole literature separately to ensure data quality
- JBI implemented to ensure the quality of each literature to include in this review

**Keywords:** Pregnancy termination, Predictors, Systematic review and meta analysis, Ethiopia

## Introduction

Pregnancy termination is a delicate and divisive topic having political, cultural, moral, and religious implications. Also, it is a problem for public health in many regions of the world(1). More than 60% of unintended pregnancies result in induced abortion, with the majority of those being unsafe, resulting in approximately 73 million induced abortions performed globally each year(2). Developing countries bear the burden of 97% of all unsafe abortions and contribute to 220 deaths per 100,000 live births(3).

Moreover, abortion imposes an additional burden on health institutions and individuals; 7 million women per year were treated in hospital facilities for complications of unsafe abortion in developing countries alone(4). It is estimated that health-care systems will spend \$553 million per year on post-abortion complications and will lose \$922 million in income due to long-term disability caused by unsafe termination(5). Additionally, a woman with a history of pregnancy termination has an increased risk of subsequent preterm birth, especially when performed by mechanical dilation and curettage or performed repeatedly (6).

Though the burden of pregnancy termination has significant causes of maternal mortality and morbidity in Ethiopia(7). Previous studies conducted in Ethiopia have shown that the prevalence of pregnancy termination and its negative consequences are increasing over time(8, 9), and repeated induced abortion also account significant amount (10-12). Several variables, including early age marriage, low level of education, early sexual intercourse initiation, violence/rape, emotional well-being, educational status, employment status, and resources, and sexual intercourse relationship, have been implicated as predictors of pregnancy termination in studies conducted across Ethiopia(13-16).

However, at the national level, illustrative evidence is lacking in Ethiopia regarding the level and underlying factors of pregnancy termination. Thus, this systematic review and meta-analysis aimed to assess the prevalence of pregnancy termination and its associated factors in Ethiopia. The findings of this study provide evidence for intervention to reduce the burden of pregnancy termination, its complications, and its economic impact in the country. Additionally, this study will help to design strategies and monitor the progress of programs aimed at achieving the maternal mortality reduction targets of the sustainable development goals.

## Methods

### Study design and search strategy

A search in PubMed, EMBASE, Medline, and reference lists was performed for relevant articles to assess the pooled prevalence and predictors of pregnancy termination in Ethiopia. Well-known PRISMA guidelines were strictly followed in doing this review. Similarly, the quality of our systematic review and meta-analysis was assessed using the Joanna Briggs Institute (JBI) critical appraisal checklist(17). The data extraction tool contains information on the author, title, year of publication, study area and region, study design and type, study population, sample size, the outcome measured, and the prevalence rate of pregnancy termination.

We used the search terms “(((((((Abortion) OR (termination of pregnancy)) OR (miscarriage)) AND (determinant factors)) OR (predictors)) OR (associated factors)) OR (influencing factors)) AND (Ethiopia)”.

### Study selection and eligibility criteria

The study period for the review ranged from January 2004 to January 2023. MESH terms were pregnancy termination, abortion, and miscarriage. We included cross-sectional and case-control studies that showed the prevalence of or predictors of pregnancy termination or miscarriage. Case reports, case series, reviews, editorials, and studies published as abstracts only were excluded. The references of the selected articles were also screened to retrieve any additional articles that could be incorporated into this review.

### Quality assessment and data extraction

Articles were screened using their titles, abstracts, and full paper reviews before being included in the meta-analysis. The quality of included studies was evaluated using the Joanna Briggs Institute (JBI) critical appraisal checklist(17). The quality scores of included studies were assessed and presented using the mean scores to designate them as high- or low-quality. The JBI tool for prevalence and predictor studies was used as a guideline for data extraction from the final selected articles. The data extraction tool contains information on the author and year of the study, the title, the year the study was conducted and the year of publication, the study area and

1  
2  
3 region, the study design and type, the study population, the sample size, the response rate, the  
4 outcome measured, and the prevalence and predictors of pregnancy termination. Moreover, all  
5 authors independently reviewed the titles and abstracts of studies to be included in this  
6 systematic review and meta-analysis. Agreements on the inclusion and exclusion of the articles  
7 were reached with the participation of all authors.  
8  
9  
10  
11  
12

### 13 **Heterogeneity and publication Bias**

14  
15 The  $I^2$  statistics were used to assess the heterogeneity of the studies that were included. The p-  
16 value for  $I^2$  statistics less than 0.05 was used to determine the presence of heterogeneity. Based  
17 on the  $I^2$  test statistics results, the heterogeneity is categorized as low (25%), moderate (50%),  
18 and high (75%) (18). Moreover, the publication bias was assessed using the Egger regression  
19 asymmetry test (19, 20). The presence of publication bias is declared when the Egger test result's  
20 P-value is less than 0.05. The Duval and Tweedie nonparametric trim and fill analysis using the  
21 random effect analysis was conducted to see the presence of publication bias(21).  
22  
23  
24  
25  
26  
27

### 28 **Measurement of the outcome variable**

29  
30  
31 In this study, pregnancy termination is the removal of pregnancy tissue, the products of  
32 conception, or the fetus, and the placenta from the uterus. In general, the terms "fetus" and  
33 "placenta" are used after eight weeks of pregnancy. Pregnancy tissue and products of conception  
34 refer to tissue produced by the union of an egg and sperm before eight weeks. It is a deliberate  
35 intervention to terminate a pregnancy, either by a health professional or the woman herself(22).  
36  
37  
38  
39

40 **Patient and Public Involvement:** N/A

### 41 **Statistical methods and analysis**

42  
43 Data were entered into Microsoft Excel, and the meta-analysis was conducted using Stata 16  
44 software. The prevalence of pregnancy termination in Ethiopia was shown by forest plots. Due to  
45 its help in minimizing the heterogeneity of included studies, the random effect model of analysis  
46 was used as a method of meta-analysis(18). Sub-group analysis was conducted by study setting,  
47 population, and study period. Predictors of pregnancy termination were presented using odds  
48 ratios (ORs) at a 95% confidence interval (CI).  
49  
50  
51  
52  
53  
54  
55  
56  
57



1  
2  
3  
4  
5  
6  
7  
8  
9  
10  
11  
12  
13  
14  
15  
16  
17  
18  
19  
20  
21  
22  
23  
24  
25  
26  
27  
28  
29  
30  
31  
32  
33  
34  
35  
36  
37  
38  
39  
40  
41  
42  
43  
44  
45  
46  
47  
48  
49  
50  
51  
52  
53  
54  
55  
56  
57  
58  
59  
60

For peer review only

## Result

### Study selection

This systematic review and meta-analysis included published studies on the termination of pregnancy in Ethiopia. A total of 12,242 records were retrieved through electronic database searching, and only 33 articles were included in the final analysis (Figure 1).

### Characteristics of included studies

Thirty-three studies conducted in different regions of Ethiopia were represented in this review. Of all the studies, 8 (24.24%) were from the Amhara Region(11, 12, 15, 16, 23-26), South Nations and Nationalities accounted for 9 (27.27%) of the total(13, 27-34), 1 was from Oromia (35), 5 (15.15%) from Addis Ababa city administration(10, 14, 36-38), 3 (9.09%) were from Harari region(39-41), 3 (9.09%) were from Tigray region(42-44), 1 (3.03%) was from Afar region(45), 3 (9.09) were from National data(46-48). Twenty-eight (84.85%) of the included studies were cross-sectional studies(10-13, 15, 23-31, 33-35, 37-42, 44-48), and remains five (15.15%) were case-control studies(14, 16, 32, 36, 43).

As well, twenty-seven of the studies were institution-based(10-16, 24, 27-33, 35-46), while six were community-based studies(23, 25, 26, 34, 47, 48). The sample size of the included studies ranged from a minimum of 124 in a study conducted in southwest Ethiopia(34) and to a maximum of 12,378 in a study conducted using DHS data(48). Lastly, this review included a total of 40,116 study participants.

### Prevalence of pregnancy termination in Ethiopia

Based on the random effect model, the overall pooled prevalence of termination of pregnancy among women in Ethiopia was 21.52% (95% CI: 15.01–28.03). The meta-analysis included studies with significant heterogeneity:  $I^2 = 99.8\%$ ,  $p = 0.000$ . Publication biases among the included studies were examined using funnel plots and Egger's regression test. The results of funnel plots showed an asymmetric shape, which indicates the presence of publication bias among those included studies. Additionally, the Duval and Tweedie nonparametric trim and fill analysis was applied to correct publication bias among the studies, but no trimming was performed since the data is unchanged (Figures 3 and 4).

1  
2  
3 Objective assessments of publication bias by Egger's regression test also showed the presence of  
4 publication bias across studies ( $p$ -value 0.001). After adjustment, the final pooled prevalence of  
5 pregnancy termination in Ethiopia after the trim and fill analysis was 21.52% (95% CI: 15.01–  
6 28.03) (Figure 2).  
7  
8  
9

### 10 **Subgroup analysis**

11  
12  
13 We performed subgroup analysis based on the region, study population, and study setting of the  
14 included studies. Table 1 shows the pooled prevalence was highest, 35.60% (95% CI: 28.86,  
15 42.34) in the Oromia region, followed by 34.17% (95% CI: 17.67, 86.01) in the Tigray region,  
16 24.63% (95% CI: 10.52, 37.75) in the South Nation and Nationalities People Region, and the  
17 lowest was seen in three studies conducted using demographic health data, 12.10% (95% CI:  
18 5.66, 18.50) (Figure 5).  
19  
20  
21  
22  
23  
24

25 Furthermore, subgroup analysis reveals that the highest pooled prevalence of abortion was seen  
26 among gynecological admitted patients, at 60.60% (95% CI: 59.47, 61.73), followed by 25.38%  
27 (95% CI: 9.39, 41.32) among university/college students, and 27.90% (95% CI: 20.01, 35.79)  
28 among insecurely housed women, with the lowest pooled prevalence being seen among pregnant  
29 women and youth women. Additionally, subgroup analysis was conducted based on the year  
30 before and after the Millennium Development Goals' implementation. The pooled prevalence of  
31 pregnancy termination before and after MDGs was 20.55% (95% CI: 16.10–24.99) and 21.61%  
32 (95% CI: 15.01–28.03), respectively (Figure 7).  
33  
34  
35  
36  
37  
38  
39  
40  
41  
42  
43  
44  
45  
46  
47  
48  
49  
50  
51  
52  
53  
54  
55  
56  
57  
58  
59  
60

Table 1: Subgroup analysis for the prevalence of pregnancy termination in Ethiopia, 2004-2022

| Subgroup                      | Number of studies | Total Sample | Prevalence (95%CI)          | Heterogeneity  |              |
|-------------------------------|-------------------|--------------|-----------------------------|----------------|--------------|
|                               |                   |              |                             | I <sup>2</sup> | p-value      |
| <b>By region</b>              |                   |              |                             |                |              |
| Addis Ababa                   | 2                 | 855          | 25.49(10.39, 40.09)         | 92.4           | 0.000        |
| Amhara                        | 6                 | 2371         | 18.06(6.27, 29.85)          | 99.0           | 0.000        |
| SNNP                          | 8                 | 3678         | 24.63(95% CI: 10.52, 37.75) | 99.4           | 0.000        |
| National Data                 | 3                 | 19854        | 12.10(5.70, 18.50)          | 99.7           | 0.000        |
| Tigray                        | 2                 | 7463         | 34.17(17.6, 86.01)          | 99.9           | 0.000        |
| Harari                        | 2                 | 1835         | 16.13(12.21, 20.05)         | 81.2           | 0.021        |
| Oromia                        | 1                 | 194          | 35.60(28.86, 42.34)         | .              | .            |
| Afar                          | 1                 | 509          | 8.80(6.34, 11.26)           | .              | .            |
| <b>By publication year</b>    |                   |              |                             |                |              |
| 2016 to 2022 (post MDG)       | 15                | 24234        | 20.55(16.10, 24.99)         | 99.3           | 0.000        |
| Before MDG                    | 10                | 12525        | 22.61(4.55, 40.66)          | 99.9           | 0.000        |
| <b>Study population</b>       |                   |              |                             |                |              |
| Reproductive age              | 8                 | 4426         | 17.03(8.55, 25.52)          | 99.0           | 0.000        |
| Pregnant women                | 1                 | 12378        | 8.90(8.40, 9.40)            | .              | .            |
| Abortion care seeker          | 7                 | 2990         | 21.19(14.65, 27.72)         | 95.3           | 0.000        |
| University or college student | 6                 | 3237         | 25.36(9.39, 41.32)          | 99.5           | 0.000        |
| Gynecological patient         | 1                 | 7203         | 60.60(59.47, 61.73)         | .              | .            |
| Youth women                   | 1                 | 6401         | 2.50(2.12, 2.88)            | .              | .            |
| Insecurely household women    | 1                 | 124          | 27.90(20.01, 35.79)         | .              | .            |
| <b>Total</b>                  | <b>25</b>         | <b>36759</b> | <b>21.52(15.01, 28.03)</b>  | <b>99.8</b>    | <b>0.000</b> |

## Predictors of pregnancy termination

### Socio-demographic characteristics

The sociodemographic factors included in this analysis were the place of residence, age, marital, occupational, and educational status of the women. A separate analysis was conducted for each variable. Finally, a meta-analysis of (16, 39) two studies showed that being a student was significantly associated with pregnancy termination (OR: 4.85; 95% CI: 1.98, 11.91). There was moderate heterogeneity ( $I^2 = 39\%$ ) (Figures 8 and 9).

## Reproductive characteristics

A total of 5 articles (15, 24, 28, 43, 47) were included to assess the association between first sexual initiation before the age of 18 and pregnancy termination. The pooled meta-analysis found that women who had their first sexual experience before the age of 18 were twice as likely as those who had their first sexual experience after the age of 18 to have their pregnancy terminated (OR = 1.78; 95% CI = 1.13, 2.82). There was moderate heterogeneity ( $I^2 = 41.6\%$ ). Moreover, two articles (11, 43) were also included to determine the association between irregular menstrual bleeding and pregnancy termination. The final pooled meta-analysis using data from the two articles found that pregnancy termination was nearly two times more likely to occur in women with irregular menstrual bleeding than in those who had regular menstrual bleeding, (OR = 1.86; 95% CI = 1.25, 2.77). Similarly, a meta-analysis of six studies (14, 15, 24, 32, 34, 43) showed that women who had multiple sexual partners were significantly associated with pregnancy termination (OR: 4.88; 95% CI: 3.43, 6.93). There was low heterogeneity ( $I^2 = 13.4\%$ ) (Figure 10).

## Discussion

Pregnancy termination is a major public health concern in Ethiopia (49). In this systematic review and meta-analysis, the overall magnitude of pregnancy termination was pooled from 25 published articles in Ethiopia, and significant predictors of pregnancy termination were identified using different articles. Being a student increased the rate of termination of pregnancy nearly five times. In addition, first sexual initiation before the age of 18, women with irregular menstrual bleeding, and multiple sexual partners were predictors of pregnancy termination in Ethiopia. The findings of this review revealed evidence to help reduce the impact of pregnancy termination in Ethiopia by aiming at the main predictors for pregnancy termination.

There are different studies conducted on this issue at community, health, and higher education institutions with different figures. This study found a higher prevalence of termination of pregnancy in Ethiopia compared to other low- and middle-income countries.

The pooled prevalence of termination of pregnancy in Ethiopia was 21.52%. This finding is lower compared to a study conducted in Ghana at 25% (50), higher than in Mozambique at 9 % ( $\times 2.33$ ) (50), and in India at 1.7% ( $\times 12$ ) (51). The difference might be due to the difference in the study population, study design, study area, socio-demographic characteristics, and the differences in health policies of the countries. That is, the current study was conducted using meta-analysis at the national level, which includes community or institutional studies, while the study in Ghana and Mozambique was conducted using demographic health data with a small sample size compared to the current study(50). Additionally, in our study, huge variations were seen across the regions. Moreover, a spatial analysis study conducted in Ethiopia using national DHS data also showed variation even within the regions of the country(48). Thus, acting according to the needs of the region and age-specific policy is important in national policy or guideline development.

Our study observed that being a student was significantly associated with the termination of pregnancy. One of the possible explanations could be that students are likely to be adolescents, belonging to the younger age category. In addition, adolescent girls are remaining in school longer, which may factor into their decisions to postpone childbearing and terminate unintended

1  
2  
3 pregnancies(52). Likewise, a study conducted in India shows the tendency for pregnancy  
4 termination is high in this age category since the rate of unintended pregnancies and unmet needs  
5 for family planning are high in this age group(53). The higher rate of pregnancy termination  
6 could also be attributed to a failure to provide education about the risks of pregnancy termination  
7 and the mechanisms in place to prevent unintended pregnancy. Contraception use aids in the  
8 prevention of unintended pregnancy and unsafe abortions(54).  
9

10  
11  
12  
13  
14 Additionally, the idea supported by Van Rensburg that societal poverty, unemployment, and  
15 other socio-demographic factors affect youth pregnancies and might lead to pregnancy  
16 termination is also supported(55). In addition, a review from the late 1990s found that young  
17 women often cited a desire to stay in school as a major reason for abortion(56). Moreover, many  
18 adolescents continue to have difficulty accessing contraception, often as a result of stigma and/or  
19 a lack of resources(57).  
20  
21  
22  
23  
24

25  
26 The study from Nigeria indicated that 15–24-year old women are still being left behind on  
27 reproductive health matters despite increasing global attention to prioritizing their health(58).  
28 Studies found that educational programs aimed at reducing sexual risk behaviors and preventing  
29 pregnancy among young people can effectively reduce pregnancy rates among teenagers(59).  
30 Also, programs aimed at abstinence-centered sexuality education are effective in preventing  
31 adolescent pregnancy (60). Thus, this implies a future focus on reproductive health issues  
32 specific to students to address their needs. Additionally, future researchers should better focus on  
33 possible interventions to reduce the risk of pregnancy and pregnancy termination among students.  
34  
35  
36  
37  
38  
39

40  
41 This review also assessed the association of selected variables with pregnancy termination.  
42 Women under the age of 18 at first sex were significantly more likely to terminate their  
43 pregnancy. This finding is consistent with studies conducted in Nigeria and Peru that reported a  
44 higher rate of pregnancy termination among women who had their age at first sex before 18  
45 years old (61-63). Studies also revealed that early sexual debuts are significantly associated with  
46 adolescent pregnancies, which are usually unwanted (64, 65). In addition, a study conducted in  
47 Ethiopia shown engaging in sex before the age of 18 years was found to have a higher odds of  
48 experiencing repeat induced abortion (66).  
49  
50  
51  
52  
53  
54  
55  
56  
57  
58  
59  
60

1  
2  
3 In many low income countries, rising ages at first marriage combined with increasing levels of  
4 premarital sex continue to result in unintended pregnancies among adolescents(67). Thus,  
5 improving the knowledge of adolescents about sexual and reproductive health issues, and  
6 increasing contraceptive access and use among young people, are important to prevent unsafe  
7 abortion or pregnancy termination(68). This necessitates the development of reproductive health  
8 education specifically for adolescent girls. Future researchers should also address the gap in  
9 studies on the needs of adolescent girls and possible interventions needed to reduce sexual  
10 initiation before the age of 18 years.

11  
12 Furthermore, at the individual level, we found that pregnancy termination was significantly  
13 associated with women who had multiple sexual partners. Likewise, a study conducted in Peru  
14 indicated that as the number of sexual partners increased, the odds of getting a pregnancy  
15 termination increased(69). Furthermore, studies in Cambodia, China, and the United Kingdom  
16 have found that having multiple sexual partners is associated with a higher rate of repeated  
17 pregnancy termination(54, 70, 71). The government shall be emphasized reproductive health  
18 education, particularly for women regarding the risks of multiple sexual partners, the access  
19 where, and how to get counseling on how to prevent pregnancy.

20  
21 This study also found that pregnancy termination was two times higher among women who had  
22 menstrual irregularities compared to their counterparts. Lastly, this systematic review and meta-  
23 analysis indicated that there was no statistically significant association between the termination  
24 of pregnancy and rural residents, marital status, women's age, educational status, primiparous,  
25 history of abortion, and wanted pregnancy.

26  
27 As a limitation, this finding might be prone to the risk of bias due to the significant heterogeneity  
28 of articles included from a different region of Ethiopia. In addition, differences in the study  
29 population, setting, and design within the included studies might influence the results of this  
30 review. Moreover, studies conducted in health institutions, Colleges, or higher education might  
31 affect the pooled estimates. Additionally, in this review, only published articles were included.  
32 On the other hand, the fact that self-performed pregnancy termination is becoming common,  
33 especially when performed early, makes it difficult to determine the true prevalence of  
34 pregnancy termination. Abortifacients like misoprostol tablets are poorly restricted in many  
35 African countries(72). Future research must explain the relationship between pregnancy  
36  
37  
38  
39  
40  
41  
42  
43  
44  
45  
46  
47  
48  
49  
50  
51  
52  
53  
54  
55  
56  
57  
58  
59  
60



1  
2  
3 termination and other predictors such as social, economic, substance use, peer pressure, alcohol  
4 use, sexual or physical violence, and knowledge of sexual and reproductive health issues such as  
5 family planning and fertility. Also, this review didn't include qualitative studies on the  
6 explanations for pregnancy termination.  
7  
8  
9

## 10 11 **Conclusions**

12  
13  
14 One in every five women had their pregnancies terminated, which is a high rate when compared  
15 to other students in Sub-Saharan Africa. Being a student was significantly associated with the  
16 termination of a pregnancy. In addition, irregular menstrual bleeding, early initiation of sexual  
17 intercourse, and multiple sexual partners were important predictors of pregnancy termination  
18  
19  
20  
21

## 22 **Abbreviations**

23  
24  
25 OR: odds ratios; CI: confidence interval; JBI: Joanna Briggs Institute; MDG: Millennium  
26 Development Goals'  
27  
28  
29

## 30 **Declarations**

31  
32  
33 **Ethical approval:** Not required. This article is based on published articles.

34  
35 **Funding:** None declared.

36  
37 **Availability of data and materials:** The datasets used and analyzed during the current study are  
38 available from the corresponding author upon reasonable request(lebezaa@gmail.com).  
39

40  
41 **Competing interests:** None declared.

42  
43 **Author contributions:** HK, MWA, AKA, EKM, TH, and LAT conducted the search and data  
44 extraction. HK, LAT, EKM, and MWA. wrote the first draft of the manuscript. LAT, EKM,  
45 MWA and HK conducted the statistical analyses and data interpretation. All authors read and  
46 approved the final manuscript.  
47  
48  
49  
50  
51  
52  
53  
54  
55  
56  
57  
58  
59  
60

## Reference

1. Mesce D, Clifto D. Abortion facts and figures; population reference bureau. Geneva: WHO. 2011.
2. Bearak J, Popinchalk A, Ganatra B, Moller A-B, Tunçalp Ö, Beavin C, et al. Unintended pregnancy and abortion by income, region, and the legal status of abortion: estimates from a comprehensive model for 1990–2019. *The Lancet Global Health*. 2020;8(9):e1152-e61.
3. Ganatra B, Gerdtz C, Rossier C, Johnson Jr BR, Tunçalp Ö, Assifi A, et al. Global, regional, and subregional classification of abortions by safety, 2010–14: estimates from a Bayesian hierarchical model. *The Lancet*. 2017;390(10110):2372-81.
4. Singh S, Maddow - Zimet I. Facility - based treatment for medical complications resulting from unsafe pregnancy termination in the developing world, 2012: a review of evidence from 26 countries. *BJOG: An International Journal of Obstetrics & Gynaecology*. 2016;123(9):1489-98.
5. Vlassoff M, Shearer J, Walker D, Lucas H. Economic impact of unsafe abortion-related morbidity and mortality: evidence and estimation challenges: Institute of Development Studies Brighton, UK; 2008.
6. DeCherney AH NL, Laufer N, Roman AS. Contraception and family, gynecology. pcdatioa, 2007. teUSTM-HC.
7. Ababa A. Federal democratic republic of Ethiopia ministry of health. Ethiopia: Postnatal Care. 2003.
8. Gebrehiwot Y, Fetters T, Gebreselassie H, Moore A, Hailemariam M, Dibaba Y, et al. Changes in Morbidity and Abortion Care in Ethiopia After Legal Reform: National Results from 2008 and 2014. *Int Perspect Sex Reprod Health*. 2016;42(3):121-30. PubMed PMID: 28825903. eng.
9. Singh S, Fetters T, Gebreselassie H, Abdella A, Gebrehiwot Y, Kumbi S, et al. The estimated incidence of induced abortion in Ethiopia, 2008. *International perspectives on sexual and reproductive health*. 2010:16-25.
10. Alemayehu B, Addissie A, Ayele W, Tiroro S, Woldeyohannes D. Magnitude and associated factors of repeat induced abortion among reproductive age group women who seeks abortion Care Services at Marie Stopes International Ethiopia Clinics in Addis Ababa, Ethiopia. *Reproductive health*. 2019;16(1):1-10.
11. Mulat A, Bayu H, Mellie H, Alemu A. Induced second trimester abortion and associated factors in Amhara region referral hospitals. *BioMed research international*. 2015;2015:256534. PubMed PMID: 25918704. Pubmed Central PMCID: Pmc4396136. Epub 2015/04/29. eng.
12. Tesfaye B, Tewabe M, Ferede A, Dawson A. Induced second trimester abortion and associated factors at debre Markos referral hospital: cross-sectional study. *Women's Health*. 2020;16:1745506520929546.
13. Tesfaye G, Hambisa MT, Semahegn A. Induced abortion and associated factors in health facilities of Guraghe zone, southern Ethiopia. *Journal of pregnancy*. 2014;2014.
14. Denberu B, Alemseged F, Segni H. Determinants of abortion among youth seeking reproductive health Care in Selected Health Facilities, in Addis Ababa, Ethiopia. *Global Journal of Reproductive Medicine*. 2017;1(2):27-38.
15. Behulu GK, Fenta EA, Aynalem GL. Repeat induced abortion and associated factors among reproductive age women who seek abortion services in Debre Berhan town health institutions, Central Ethiopia, 2019. *BMC research notes*. 2019;12(1):1-5.
16. Tilahun F, Dadi AF, Shiferaw G. Determinants of abortion among clients coming for abortion service at felegehiwot referral hospital, northwest Ethiopia: a case control study. *Contraception and reproductive medicine*. 2017;2(1):1-6.
17. Aromataris E, Munn Z. Joanna Briggs Institute reviewer's manual. The Joanna Briggs Institute. 2017;2018.

18. Higgins JP, Thompson SG, Deeks JJ, Altman DG. Measuring inconsistency in meta-analyses. *Bmj*. 2003;327(7414):557-60.
19. Begg CB, Mazumdar M. Operating characteristics of a rank correlation test for publication bias. *Biometrics*. 1994:1088-101.
20. Egger M, Smith GD, Schneider M, Minder C. Bias in meta-analysis detected by a simple, graphical test. *Bmj*. 1997;315(7109):629-34.
21. Duval S, Tweedie R. A nonparametric "trim and fill" method of accounting for publication bias in meta-analysis. *Journal of the american statistical association*. 2000;95(449):89-98.
22. 2014 KAAOBAftooARA.
23. Ayenew G, Gedefaw M, Berhe R, Nigusie A. Current Status, and Correlates of Abortion among Rural Women of Gonji Kollala District, Northwest Ethiopia. *Open Journal of Epidemiology*. 2015 04/01;5:136-46.
24. Waktola MI, Mekonen DG, Nigussie TS, Cherkose EA, Abate AT. Repeat induced abortion and associated factors among women seeking abortion care services at Debre Markos town health institutions, Amhara regional state, Ethiopia, 2017. *BMC Res Notes*. 2020;13(1):44-. PubMed PMID: 31992354. eng.
25. Mariam T, Melkamu S, Yetwale F, Abdela M, Getnet M. Prevalence and Associated Factors of Unsafe Abortion among Women of Reproductive Age Group in Gondar Town, Northwest Ethiopia, 2017: A Community-based Cross-sectional Study. *Journal of Advances in Medicine and Medical Research*. 2018 11/30;28:1-7.
26. Getahun H, Berhane Y. Abortion among rural women in north Ethiopia. *International Journal of Gynecology & Obstetrics*. 2000;71(3):265-6.
27. Animaw W, Bogale B. Abortion in university and college female students of Arba Minch town, Ethiopia, 2011. *Sexual & Reproductive Healthcare*. 2014;5(1):17-22.
28. Beyene BB, Meshesha B. Magnitude And Associated Factors Of Induced Abortion Among Regular Undergraduate Students Of Dilla University. *International journal of scientific and research publications*. 2020;10:10032.
29. Sahile A, Shiferaw M. Magnitude of Induced Abortion and Associated Factors among Female Students of Hawassa University, Southern Region, Ethiopia, 2019. *Journal of pregnancy*. 2020 09/22;2020:1-6.
30. Gelaye AA, Taye KN, Mekonen T. Magnitude and risk factors of abortion among regular female students in Wolaita Sodo University, Ethiopia. *BMC Women's Health*. 2014 2014/03/26;14(1):50.
31. Nigussie T, Feyisa M, Yosef T, Berhanu M, Asefa A. Prevalence of induced abortion and its associated factors among female students of health science in South West Ethiopia. *The Open Nursing Journal*. 2020;14(1).
32. Abebe M, Mersha A, Degefa N, Gebremeskel F, Keefelew E, Molla W. Determinants of induced abortion among women received maternal health care services in public hospitals of Arba Minch and Wolayita Sodo town, southern Ethiopia: unmatched case-control study. *BMC women's health*. 2022;22(1):1-12.
33. Lentiro K, Gebru T, Worku A, Asfaw A, Gebremariam T, Tesfaye A. Risk factors of induced abortion among preparatory school student in Guraghe zone, Southern region, Ethiopia: a cross-sectional study. *BMC Women's Health*. 2019;19(1):1-7.
34. Alemu K, Birhanu S, Fekadu L, Endale F, Tamene A, Habte A. Safe abortion service utilization and associated factors among insecurely housed women who experienced abortion in southwest Ethiopia, 2021: A community-based cross-sectional study. *Plos one*. 2022;17(8):e0272939.
35. Gebeyehu D, Admassu B, Sinega M, Haile M. Assessment of Prevalence and Reasons for Termination of Pregnancy at Jimma University Teaching Hospital, Ethiopia. *Universal Journal of Public Health*. 2015 11/01;3:251-5.

- 1
- 2
- 3
- 4 36. Megersa BS, Ojengbede OA, Deckert A, Fawole OI. Factors associated with induced abortion
- 5 among women of reproductive age attending selected health facilities in Addis Ababa, Ethiopia: a case
- 6 control study. *BMC Women's Health*. 2020;20(1):1-11.
- 7 37. Wassie AY, Lemlem SB, Boka A. Knowledge, Practice and Associated Factors Towards Medication
- 8 Abortion Among Reproductive-Age Women in Sexual and Reproductive Health Clinics of Addis Ababa,
- 9 Ethiopia, 2018: Cross-Sectional Study. *International Journal of Women's Health*. 2021;13:489.
- 10 38. Bulti F, Gela D, Dinagde N. Knowledge of Safe Abortion Care Services and Associated Factors
- 11 Among Women of Reproductive Age Working at Non-Health Sector Public Institutions in Addis Ababa,
- 12 Ethiopia. 2021.
- 13 39. Jamie AH, Abdosh MZ. Prevalence of induced abortion and associated factors among women of
- 14 reproductive age in Harari region, Ethiopia. *Public Health of Indonesia*. 2020;6(2):35-40.
- 15 40. Mohammed M, Wesenu M. Prevalence and determinants associated with second trimester
- 16 termination of pregnancy in Harari city, Ethiopia; Cross sectional study. 2021.
- 17 41. Worku S, Fantahun M. Unintended pregnancy and induced abortion in a town with accessible
- 18 family planning services: the case of Harar in eastern Ethiopia. *Ethiopian Journal of Health Development*.
- 19 2006;20(2):79-83.
- 20 42. Abera GB, Berhanu B, Kahsay AB, Gebru HB, Aregay A. Assessment of determinants of induced
- 21 abortion among child bearing age women attending maternal and child health clinic in Mekelle town,
- 22 Tigray, Ethiopia: a cross sectional study. *International Journal of Pharmaceutical Sciences and Research*.
- 23 2012;3(12):4745.
- 24 43. Alemayehu M, Yebyo H, Medhanyie AA, Bayray A, Fantahun M, Goba GK. Determinants of
- 25 repeated abortion among women of reproductive age attending health facilities in Northern Ethiopia: a
- 26 case-control study. *BMC Public Health*. 2017;17(1):1-8.
- 27 44. Gessesew A. Abortion and unwanted pregnancy in Adigrat zonal hospital, Tigray, north Ethiopia.
- 28 *African journal of reproductive health*. 2010;14(3):183-8.
- 29 45. Biza N, Habib Y, Bayray A, Reddy PS. MAGNITUDE AND ASSOCIATED FACTORS OF ABORTION
- 30 AMONG REGULAR FEMALE STUDENTS OF SAMARA UNIVERSITY, AFAR, ETHIOPIA, 2016. *Medico*
- 31 *Research Chronicles*. 2018;5(3):191-201.
- 32 46. Mekbib T-A, Hiwot YG, Fantahun M. SURVEY OF UNSAFE ABORTION IN SELECTED HEALTH
- 33 FACILITIES IN ETHIOPIA. *Ethiopian Journal of Reproductive Health*. 2007;1(1):11-.
- 34 47. Gilano G, Hailegebreal S. Determinants of abortion among youth 15–24 in Ethiopia: A multilevel
- 35 analysis based on EDHS 2016. *PloS one*. 2021;16(3):e0248228.
- 36 48. Tesema GA, Mekonnen TH, Teshale AB. Spatial distribution and determinants of abortion among
- 37 reproductive age women in Ethiopia, evidence from Ethiopian Demographic and Health Survey 2016
- 38 data: Spatial and mixed-effect analysis. *PloS one*. 2020;15(6):e0235382.
- 39 49. Abdella A. Maternal mortality trend in Ethiopia. *Ethiopian Journal of Health Development*.
- 40 2010;24(1).
- 41 50. Dickson KS, Adde KS, Ahinkorah BO. Socio-economic determinants of abortion among women in
- 42 Mozambique and Ghana: evidence from demographic and health survey. *Archives of Public Health*.
- 43 2018;76(1):1-10.
- 44 51. Pallikadavath S, Stones RW. Maternal and social factors associated with abortion in India: a
- 45 population-based study. *International Family Planning Perspectives*. 2006:120-5.
- 46 52. Grant MJ, Behrman JR. Gender gaps in educational attainment in less developed countries.
- 47 *Population and development review*. 2010;36(1):71-89.
- 48 53. Jiang L, Hardee K. Women's education, family planning, or both? Application of multistate
- 49 demographic projections in India. *International journal of population research*. 2014;2014.
- 50 54. Demographic E. Addis Ababa, Ethiopia, and Rockville. Maryland, MA, USA: CSA and ICF. 2016.
- 51
- 52
- 53
- 54
- 55
- 56
- 57
- 58
- 59
- 60

- 1  
2  
3 55. van Rensburg HC. South Africa's protracted struggle for equal distribution and equitable access—  
4 still not there. *Human resources for health*. 2014;12(1):1-16.
- 5 56. Bankole A, Singh S, Haas T. Reasons why women have induced abortions: evidence from 27  
6 countries. *International family planning perspectives*. 1998:117-52.
- 7 57. Woog V, Susheela S, Alyssa B, Jesse P. Adolescent women's need for and use of sexual and  
8 reproductive health services in developing countries: Citeseer; 2015.
- 9 58. Onukwugha FI, Magadi MA, Sarki AM, Smith L. Trends in and predictors of pregnancy  
10 termination among 15–24 year-old women in Nigeria: a multi-level analysis of demographic and health  
11 surveys 2003–2018. *BMC Pregnancy and Childbirth*. 2020 2020/09/22;20(1):550.
- 12 59. Coyle K, Basen-Enquis K, Kirby D, Parcel G, Banspach S, Collins JL, Baumler ER, Caravajal S,  
13 Harrist, RB. Safer Choices: Long-term impact of a multicomponent school-based HIV, STD, and pregnancy  
14 prevention program. *Public Health Reports*. 2001;116(Suppl 1):82-93.
- 15 60. Cabezón C, Vigil P, Rojas I, Leiva ME, Riquelme R, Aranda W, et al. Adolescent pregnancy  
16 prevention: An abstinence-centered randomized controlled intervention in a Chilean public high school.  
17 *Journal of Adolescent Health*. 2005;36(1):64-9.
- 18 61. Onukwugha FI, Magadi MA, Sarki AM, Smith L. Trends in and predictors of pregnancy  
19 termination among 15–24 year-old women in Nigeria: a multi-level analysis of demographic and health  
20 surveys 2003–2018. *BMC pregnancy and childbirth*. 2020;20(1):1-13.
- 21 62. Cadmus E, Owoaje E. Knowledge about complications and practice of abortion among female  
22 undergraduates in the University of Ibadan, Nigeria. *Annals of Ibadan postgraduate medicine*.  
23 2011;9(1):19-23.
- 24 63. Ahmed S, Ray R. Determinants of pregnancy and induced and spontaneous abortion in a jointly  
25 determined framework: evidence from a country-wide, district-level household survey in India. *Journal*  
26 *of biosocial science*. 2014;46(4):480-517.
- 27 64. Morhe ES, Tagbor HK, Ankobea FK, Danso KA. Reproductive experiences of teenagers in the  
28 Ejisu-Juabeng district of Ghana. *International Journal of Gynecology & Obstetrics*. 2012;118(2):137-40.
- 29 65. Mulugeta Y, Berhane Y. Factors associated with pre-marital sexual debut among unmarried high  
30 school female students in bahir Dar town, Ethiopia: cross-sectional study. *Reproductive health*.  
31 2014;11(1):1-6.
- 32 66. Mekie M, Addisu D, Dagne W, Necho W. The level and deriving factors of repeat-induced  
33 abortion in Ethiopia: A systematic review and meta-analysis. *Heliyon*. 2021;7(1):e05984.
- 34 67. Wellings K, Collumbien M, Slaymaker E, Singh S, Hodges Z, Patel D, et al. Sexual behaviour in  
35 context: a global perspective. *The Lancet*. 2006;368(9548):1706-28.
- 36 68. WHO. Adolescent pregnancy fact sheet: World Health Organization; 2022 [updated 15  
37 September 2022; cited 2023 01/02/2023]. Available from: [https://www.who.int/en/news-room/fact-](https://www.who.int/en/news-room/fact-sheets/detail/adolescent-pregnancy)  
38 [sheets/detail/adolescent-pregnancy](https://www.who.int/en/news-room/fact-sheets/detail/adolescent-pregnancy).
- 39 69. Bernabé-Ortiz A, White PJ, Carcamo CP, Hughes JP, Gonzales MA, Garcia PJ, et al. Clandestine  
40 induced abortion: prevalence, incidence and risk factors among women in a Latin American country.  
41 *Cmaj*. 2009;180(3):298-304.
- 42 70. Cheng Y, Wang X, Lv Y, Cai Y, Li Y, Guo X, et al. Study on the risk factors of repeated abortion  
43 among unmarried adolescents. *Zhonghua liu xing bing xue za zhi= Zhonghua liuxingbingxue zazhi*.  
44 2006;27(8):669-72.
- 45 71. Yi S, Tuot S, Chhoun P, Pal K, Tith K, Brody C. Factors associated with induced abortion among  
46 female entertainment workers: a cross-sectional study in Cambodia. *BMJ open*. 2015;5(7):e007947.
- 47 72. Sherris J, Bingham A, Burns M, Girvin S, Westley E, Gomez P. Misoprostol use in developing  
48 countries: results from a multicountry study. *International Journal of Gynecology & Obstetrics*.  
49 2005;88(1):76-81.
- 50  
51  
52  
53  
54  
55  
56  
57  
58  
59  
60

1  
2  
3  
4  
5  
6  
7  
8  
9  
10  
11  
12  
13  
14  
15  
16  
17  
18  
19  
20  
21  
22  
23  
24  
25  
26  
27  
28  
29  
30  
31  
32  
33  
34  
35  
36  
37  
38  
39  
40  
41  
42  
43  
44  
45  
46  
47  
48  
49  
50  
51  
52  
53  
54  
55  
56  
57  
58  
59  
60

For peer review only

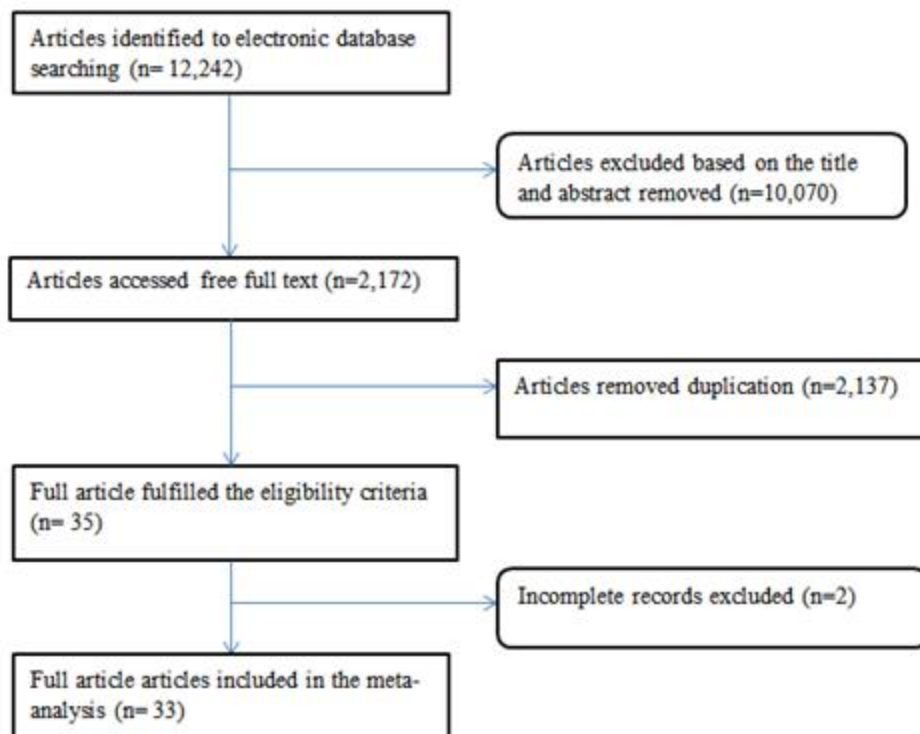

Figure 1. Flow chart of describing the selection of studies for the systematic review and meta-analysis of the prevalence of pregnancy termination and associated factors in Ethiopia, 2023

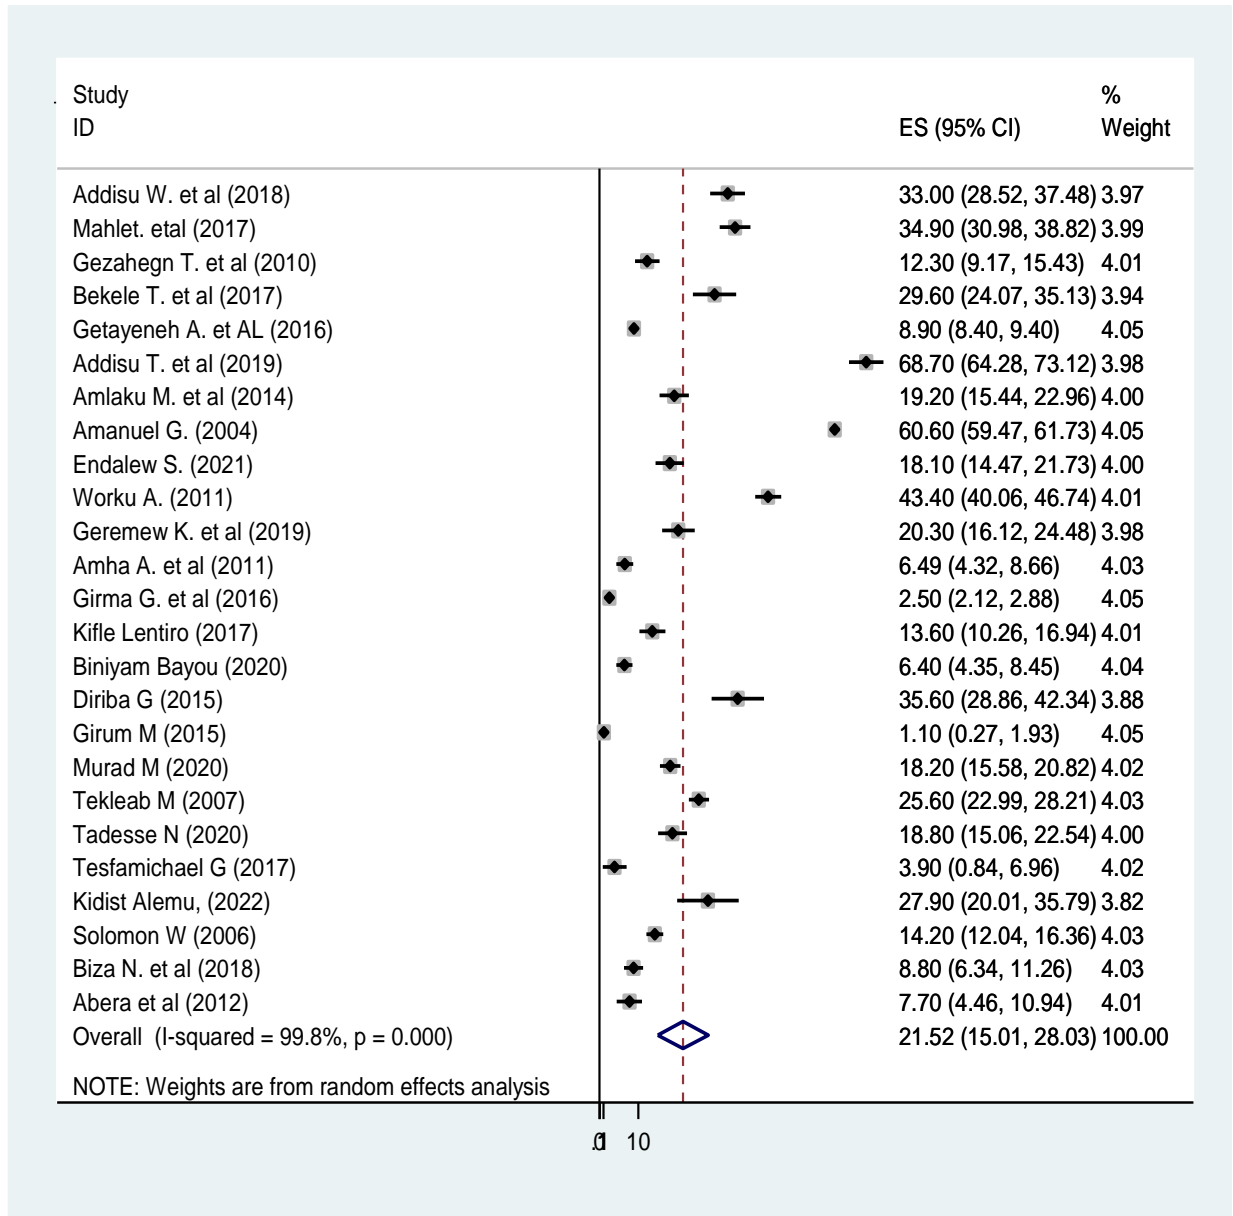

Figure-2: Forest plot of the pooled prevalence of pregnancy termination in Ethiopia, 2023



1  
2  
3  
4  
5  
6  
7  
8  
9  
10  
11  
12  
13  
14  
15  
16  
17  
18  
19  
20  
21  
22  
23  
24  
25  
26  
27  
28  
29  
30  
31  
32  
33  
34  
35  
36  
37  
38  
39  
40  
41  
42  
43  
44  
45  
46  
47  
48  
49  
50  
51  
52  
53  
54  
55  
56  
57  
58  
59  
60

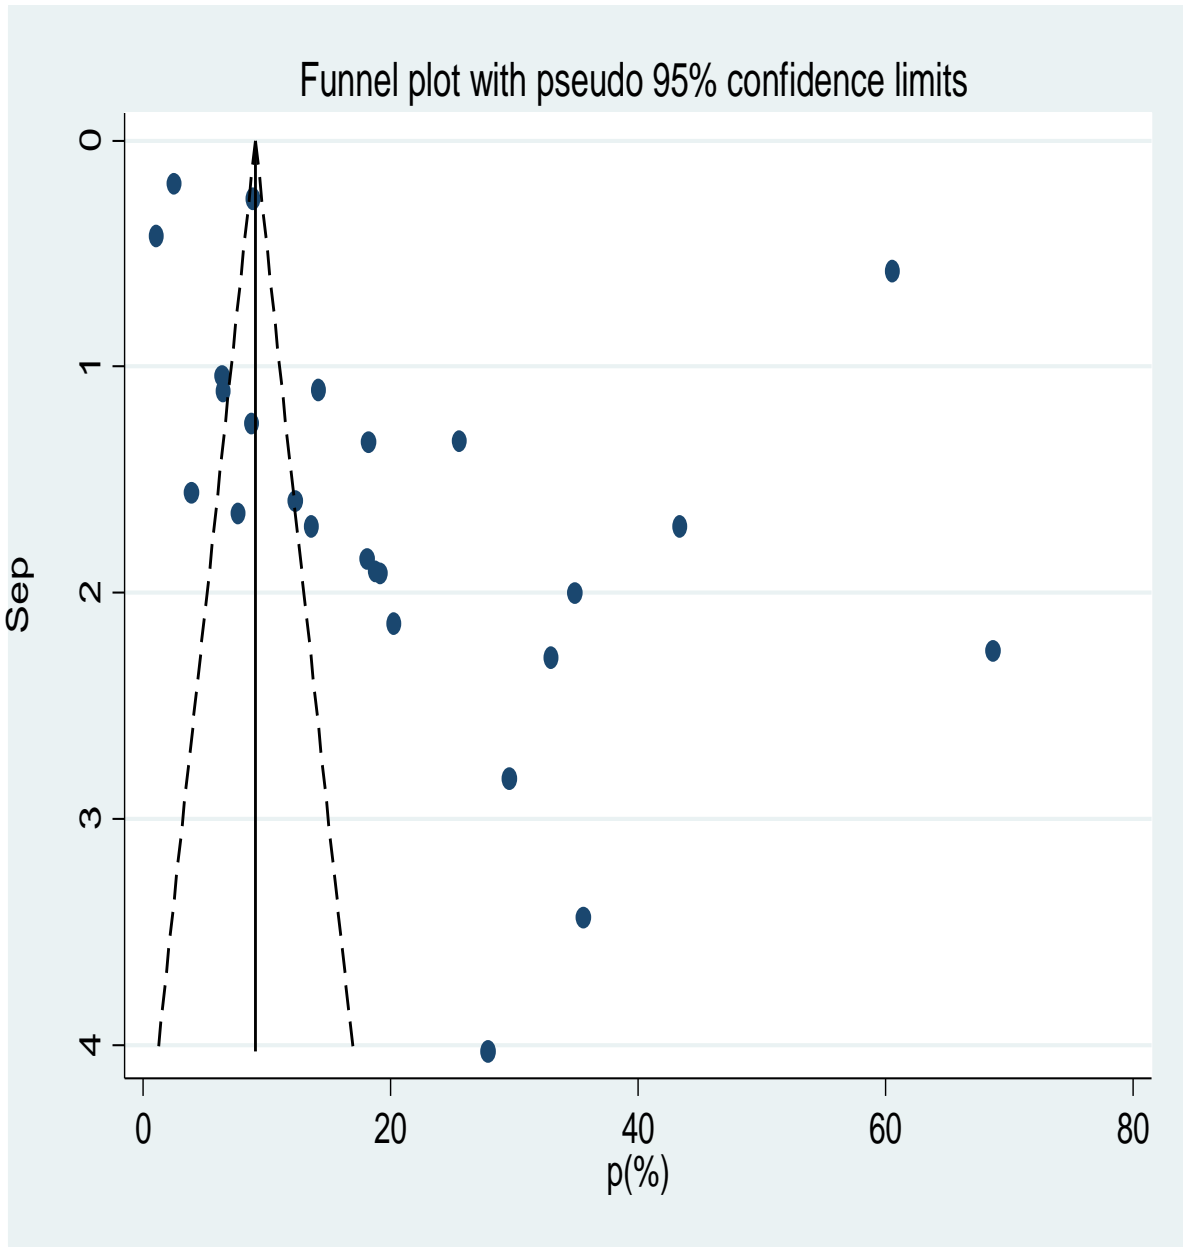

Figure-3: Funnel plot to test publication bias of pregnancy termination in Ethiopia, 2023

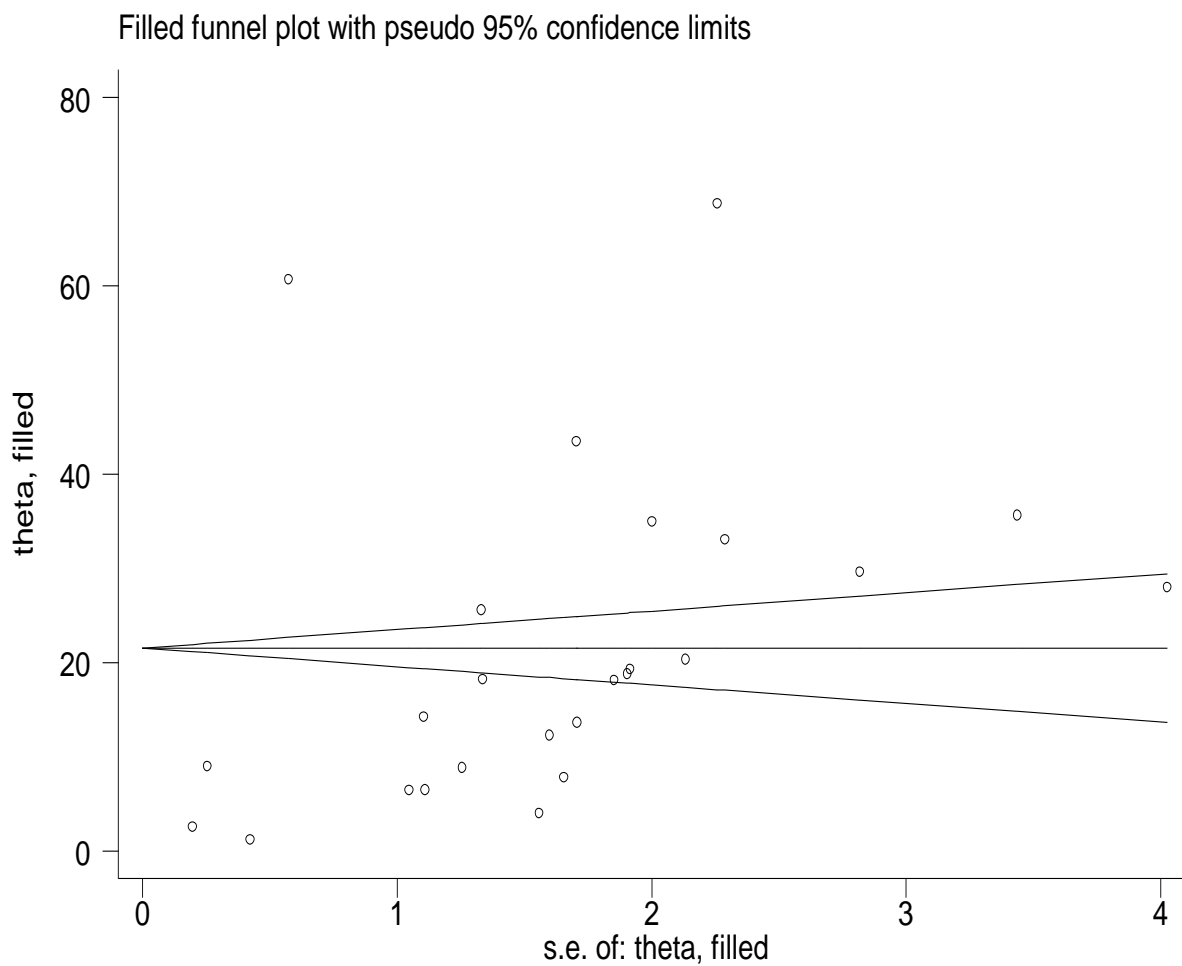

Figure-4: The Duval and Tweedie nonparametric trim and fill analysis of abortion among women in Ethiopia, 2023

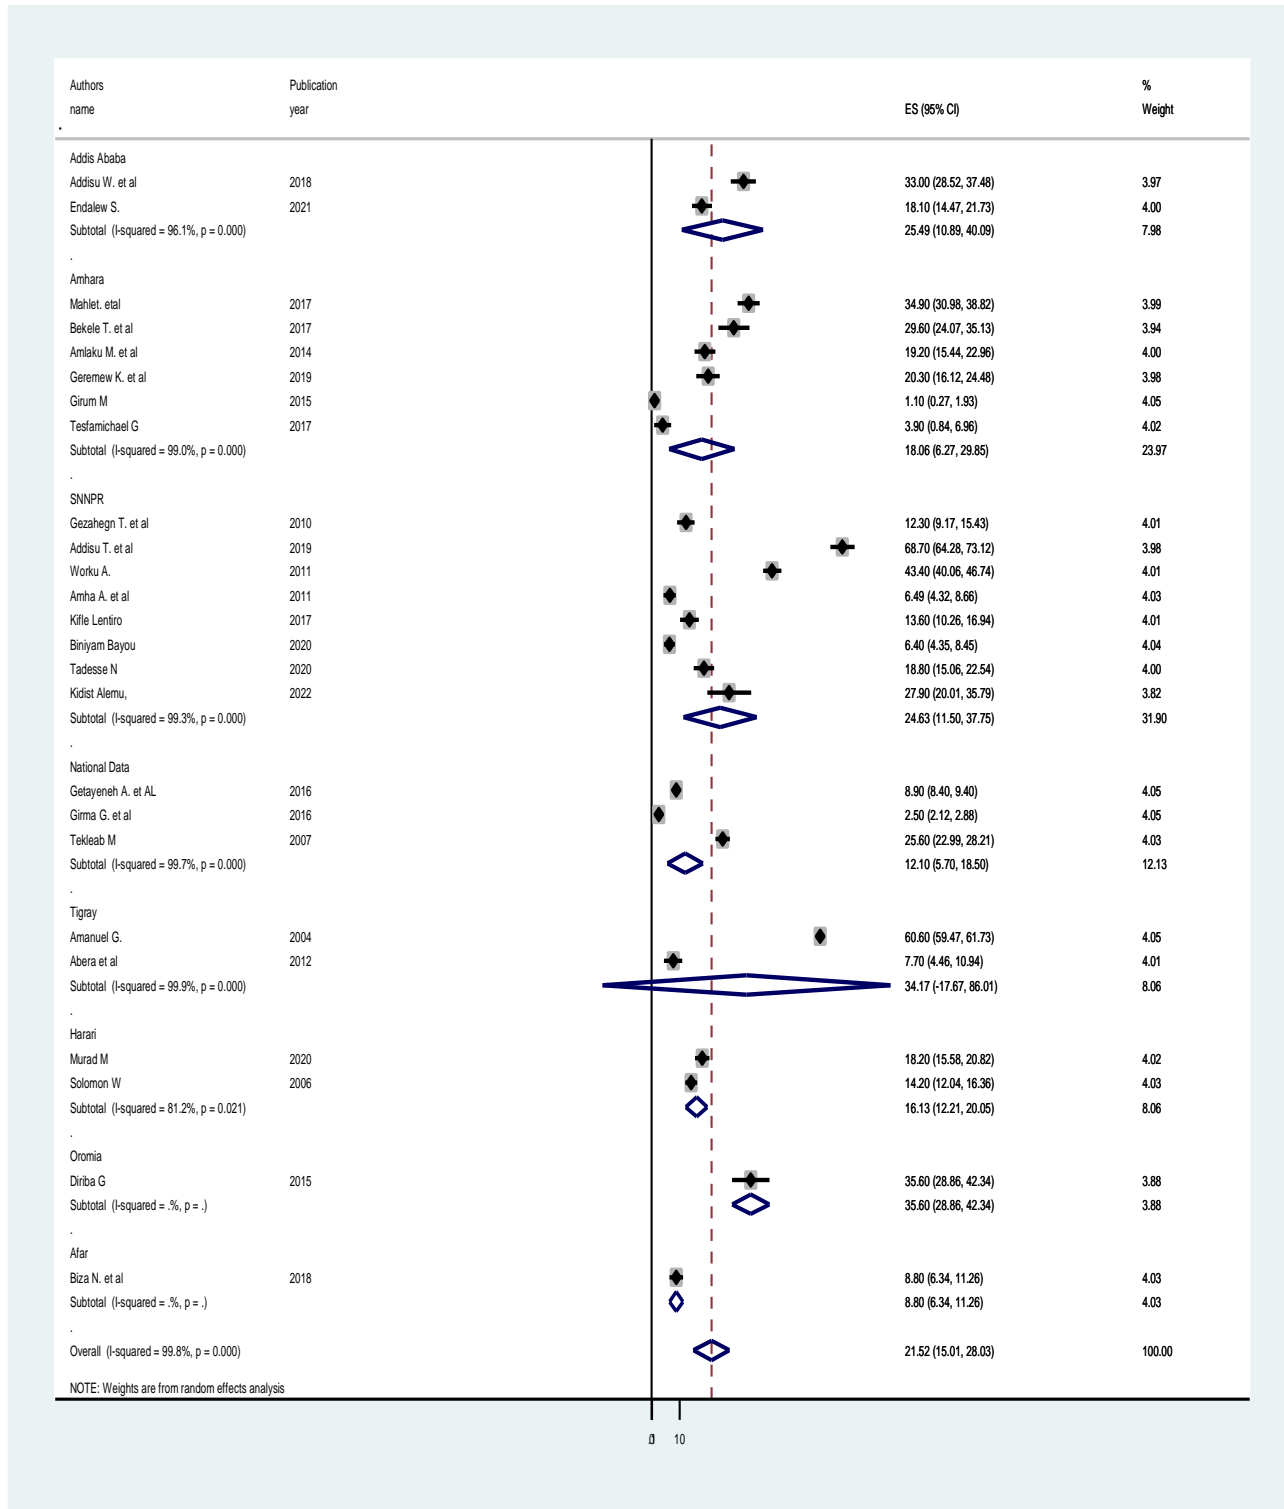

Figure-5: Subgroup analysis of the pregnancy termination based on regional distribution in Ethiopia, 2023

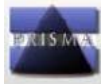

# PRISMA 2009 Checklist

| Section/topic                      | #  | Checklist item                                                                                                                                                                                                                                                                                              | Reported on page # |
|------------------------------------|----|-------------------------------------------------------------------------------------------------------------------------------------------------------------------------------------------------------------------------------------------------------------------------------------------------------------|--------------------|
| <b>TITLE</b>                       |    |                                                                                                                                                                                                                                                                                                             |                    |
| Title                              | 1  | Identify the report as a systematic review, meta-analysis, or both.                                                                                                                                                                                                                                         | 1                  |
| <b>ABSTRACT</b>                    |    |                                                                                                                                                                                                                                                                                                             |                    |
| Structured summary                 | 2  | Provide a structured summary including, as applicable: background; objectives; data sources; study eligibility criteria, participants, and interventions; study appraisal and synthesis methods; results; limitations; conclusions and implications of key findings; systematic review registration number. | 2                  |
| <b>INTRODUCTION</b>                |    |                                                                                                                                                                                                                                                                                                             |                    |
| Rationale                          | 3  | Describe the rationale for the review in the context of what is already known.                                                                                                                                                                                                                              | 3                  |
| Objectives                         | 4  | Provide an explicit statement of questions being addressed with reference to participants, interventions, comparisons, outcomes, and study design (PICOS).                                                                                                                                                  | 3                  |
| <b>METHODS</b>                     |    |                                                                                                                                                                                                                                                                                                             |                    |
| Protocol and registration          | 5  | Indicate if a review protocol exists, if and where it can be accessed (e.g., Web address), and, if available, provide registration information including registration number.                                                                                                                               | 4                  |
| Eligibility criteria               | 6  | Specify study characteristics (e.g., PICOS, length of follow-up) and report characteristics (e.g., years considered, language, publication status) used as criteria for eligibility, giving rationale.                                                                                                      | 4                  |
| Information sources                | 7  | Describe all information sources (e.g., databases with dates of coverage, contact with study authors to identify additional studies) in the search and date last searched.                                                                                                                                  | 4                  |
| Search                             | 8  | Present full electronic search strategy for at least one database, including any limits used, such that it could be repeated.                                                                                                                                                                               | 4                  |
| Study selection                    | 9  | State the process for selecting studies (i.e., screening, eligibility, included in systematic review, and, if applicable, included in the meta-analysis).                                                                                                                                                   | 6                  |
| Data collection process            | 10 | Describe method of data extraction from reports (e.g., piloted forms, independently, in duplicate) and any processes for obtaining and confirming data from investigators.                                                                                                                                  | 4                  |
| Data items                         | 11 | List and define all variables for which data were sought (e.g., PICOS, funding sources) and any assumptions and simplifications made.                                                                                                                                                                       | 5                  |
| Risk of bias in individual studies | 12 | Describe methods used for assessing risk of bias of individual studies (including specification of whether this was done at the study or outcome level), and how this information is to be used in any data synthesis.                                                                                      | 5                  |
| Summary measures                   | 13 | State the principal summary measures (e.g., risk ratio, difference in means).                                                                                                                                                                                                                               | 5                  |
| Synthesis of results               | 14 | Describe the methods of handling data and combining results of studies, if done, including measures of consistency (e.g., I <sup>2</sup> ) for each meta-analysis.                                                                                                                                          | 5                  |

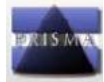

# PRISMA 2009 Checklist

Page 1 of 2

| Section/topic                 | #  | Checklist item                                                                                                                                                                                           | Reported on page # |
|-------------------------------|----|----------------------------------------------------------------------------------------------------------------------------------------------------------------------------------------------------------|--------------------|
| Risk of bias across studies   | 15 | Specify any assessment of risk of bias that may affect the cumulative evidence (e.g., publication bias, selective reporting within studies).                                                             | 5                  |
| Additional analyses           | 16 | Describe methods of additional analyses (e.g., sensitivity or subgroup analyses, meta-regression), if done, indicating which were pre-specified.                                                         | 5                  |
| <b>RESULTS</b>                |    |                                                                                                                                                                                                          | <b>6-7</b>         |
| Study selection               | 17 | Give numbers of studies screened, assessed for eligibility, and included in the review, with reasons for exclusions at each stage, ideally with a flow diagram.                                          | 6                  |
| Study characteristics         | 18 | For each study, present characteristics for which data were extracted (e.g., study size, PICOS, follow-up period) and provide the citations.                                                             | 6                  |
| Risk of bias within studies   | 19 | Present data on risk of bias of each study and, if available, any outcome level assessment (see item 12).                                                                                                | 6                  |
| Results of individual studies | 20 | For all outcomes considered (benefits or harms), present, for each study: (a) simple summary data for each intervention group (b) effect estimates and confidence intervals, ideally with a forest plot. | 6                  |
| Synthesis of results          | 21 | Present results of each meta-analysis done, including confidence intervals and measures of consistency.                                                                                                  | 6                  |
| Risk of bias across studies   | 22 | Present results of any assessment of risk of bias across studies (see Item 15).                                                                                                                          | 6                  |
| Additional analysis           | 23 | Give results of additional analyses, if done (e.g., sensitivity or subgroup analyses, meta-regression [see Item 16]).                                                                                    | 7                  |
| <b>DISCUSSION</b>             |    |                                                                                                                                                                                                          | <b>10-12</b>       |
| Summary of evidence           | 24 | Summarize the main findings including the strength of evidence for each main outcome; consider their relevance to key groups (e.g., healthcare providers, users, and policy makers).                     | 10                 |
| Limitations                   | 25 | Discuss limitations at study and outcome level (e.g., risk of bias), and at review-level (e.g., incomplete retrieval of identified research, reporting bias).                                            | 11                 |
| Conclusions                   | 26 | Provide a general interpretation of the results in the context of other evidence, and implications for future research.                                                                                  | 13                 |
| <b>FUNDING</b>                |    |                                                                                                                                                                                                          |                    |
| Funding                       | 27 | Describe sources of funding for the systematic review and other support (e.g., supply of data); role of funders for the systematic review.                                                               | 13                 |

From: Moher D, Liberati A, Tetzlaff J, Altman DG, The PRISMA Group (2009). Preferred Reporting Items for Systematic Reviews and Meta-Analyses: The PRISMA Statement. PLoS Med 6(6): e1000097. doi:10.1371/journal.pmed1000097

For more information, visit: [www.prisma-statement.org](http://www.prisma-statement.org).

Page 2 of 2

For peer review only - <http://bmjopen.bmj.com/site/about/guidelines.xhtml>

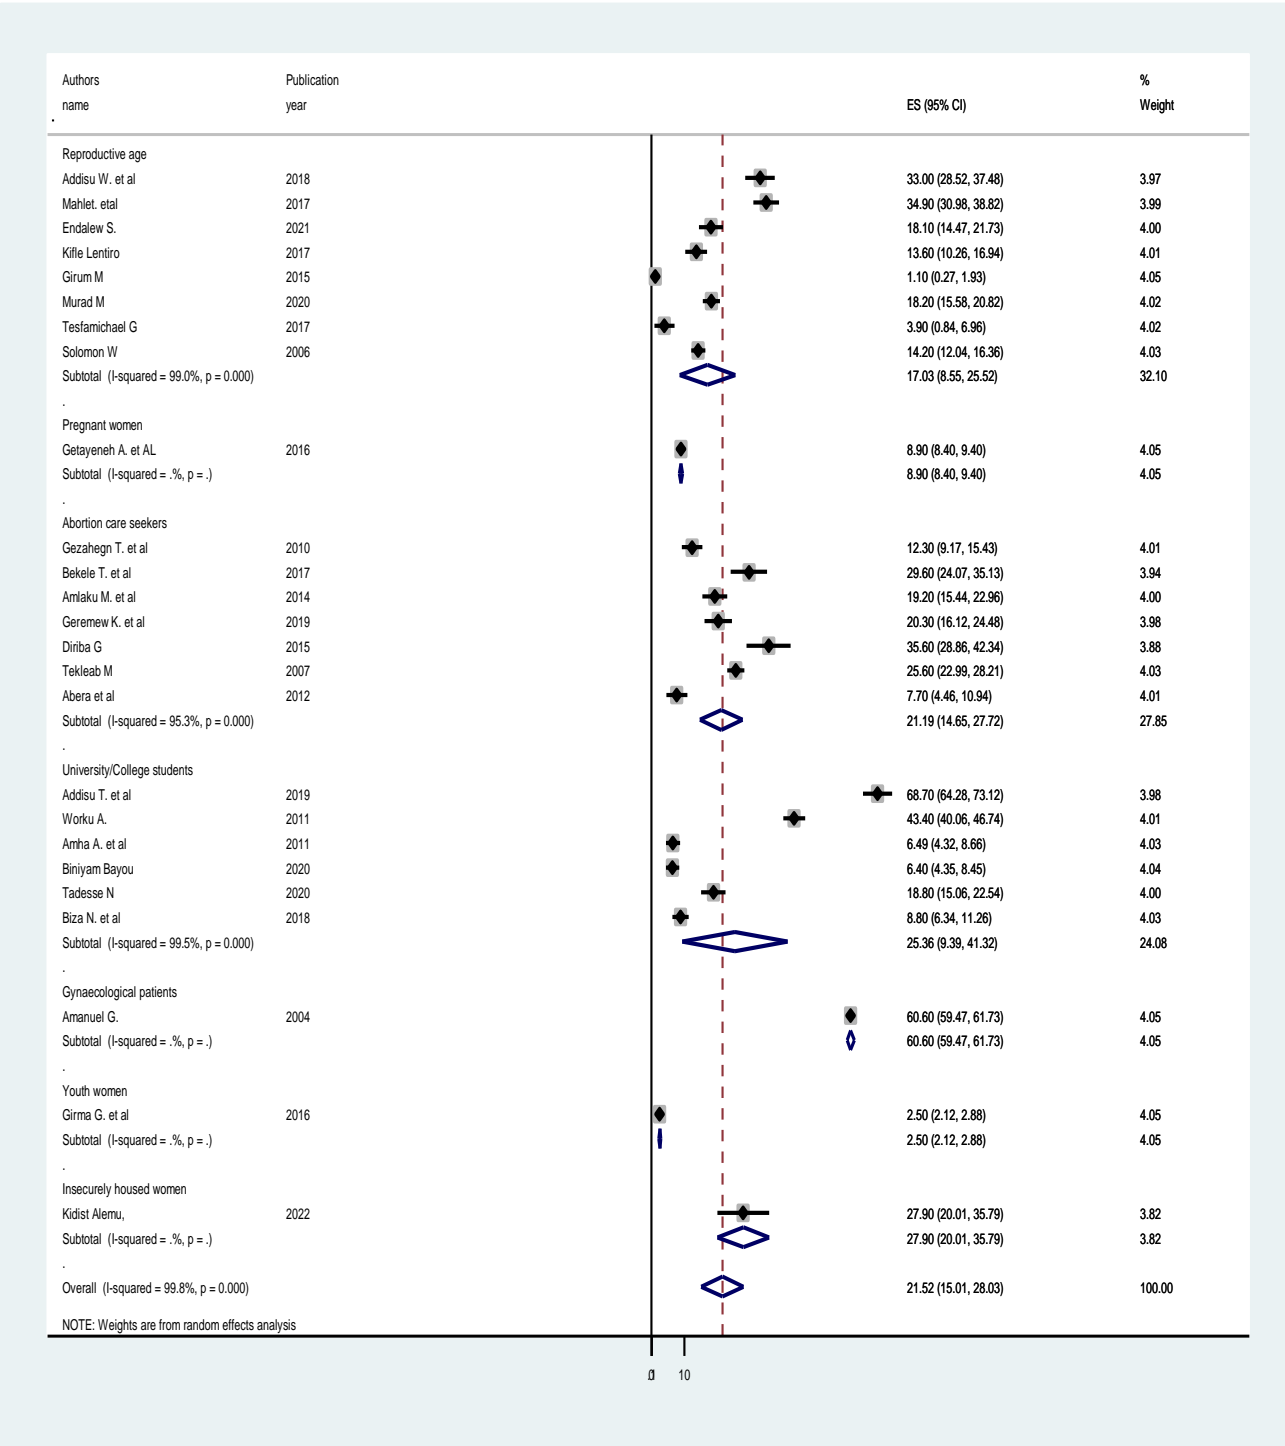

Figure-6: Subgroup analysis of the prevalence of pregnancy termination based on study population in Ethiopia, 2023

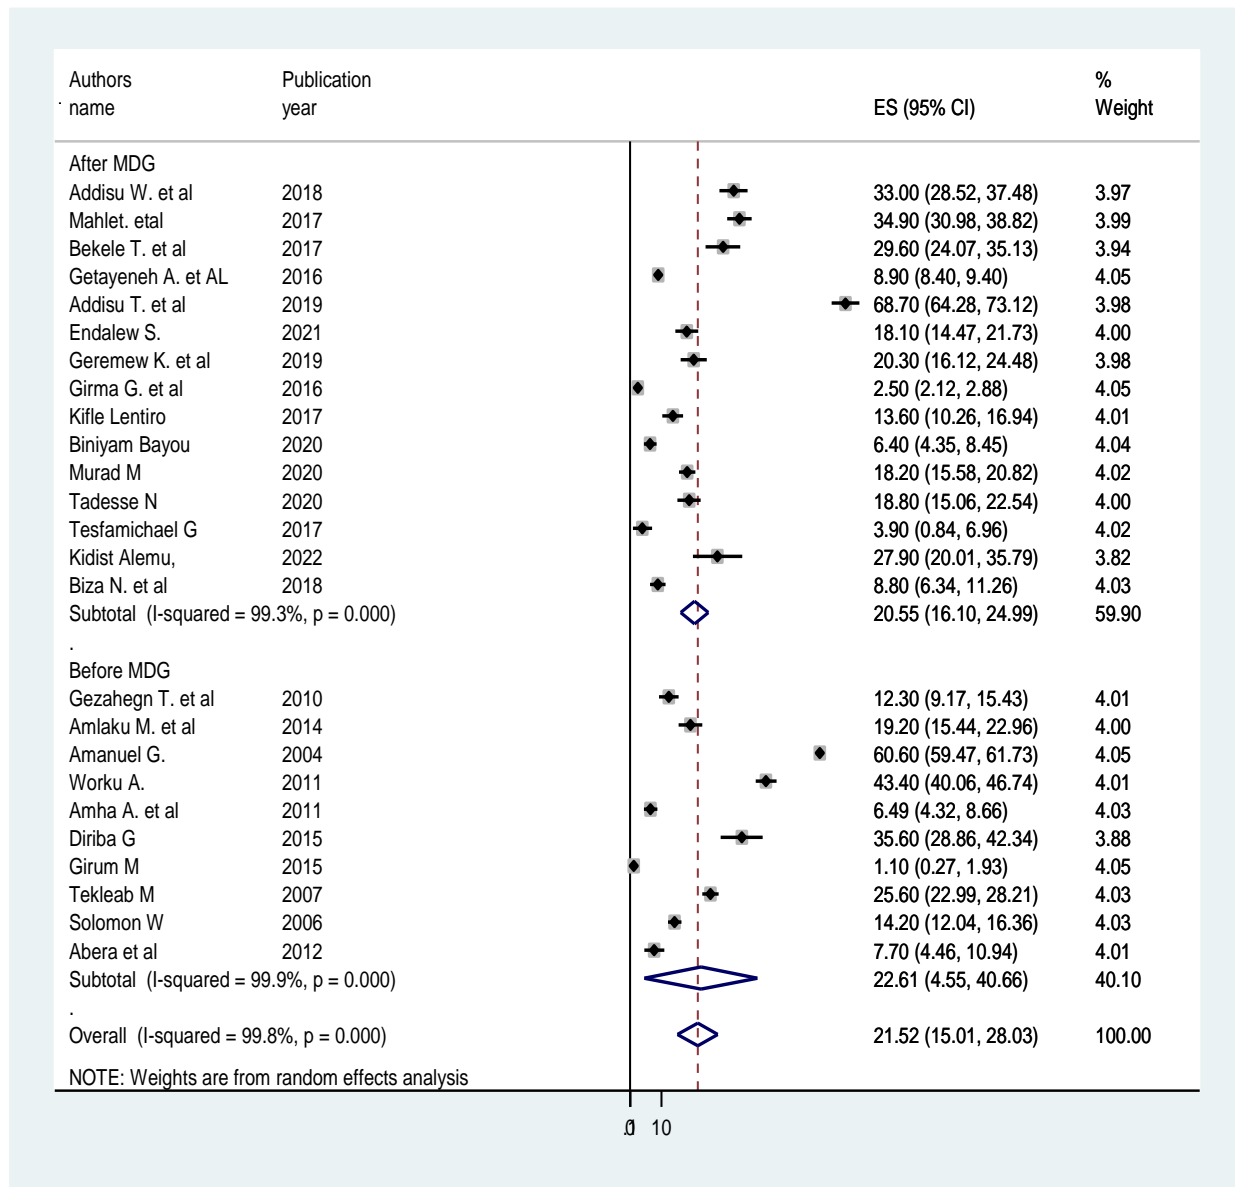

Figure-7: Subgroup analysis of the prevalence of pregnancy termination based on before and after MDG in Ethiopia, 2023

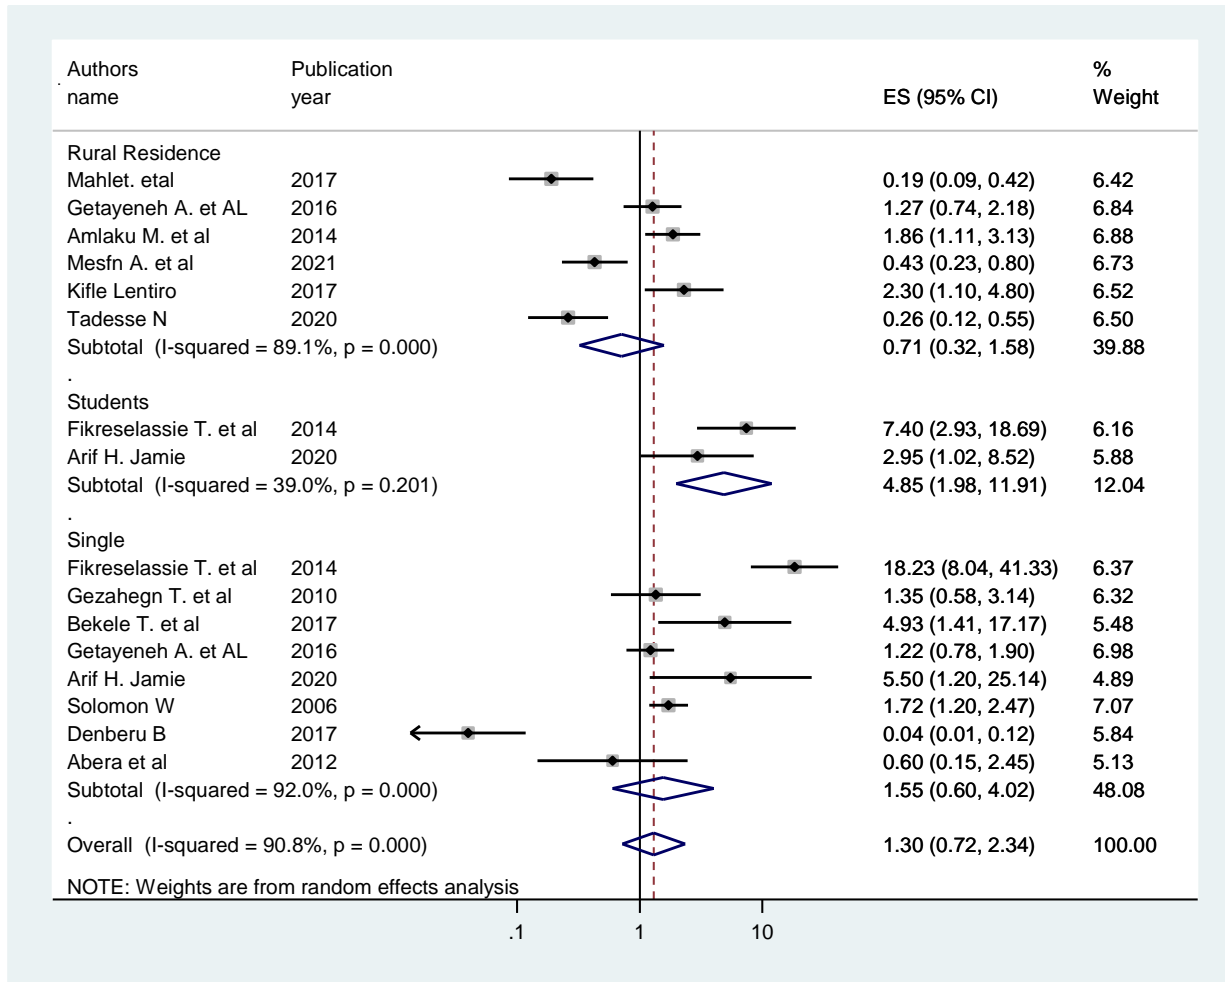

Figure-8: Forest plot of odds ratio for the association of selected socio-demographic characteristics and pregnancy termination in Ethiopia, 2023



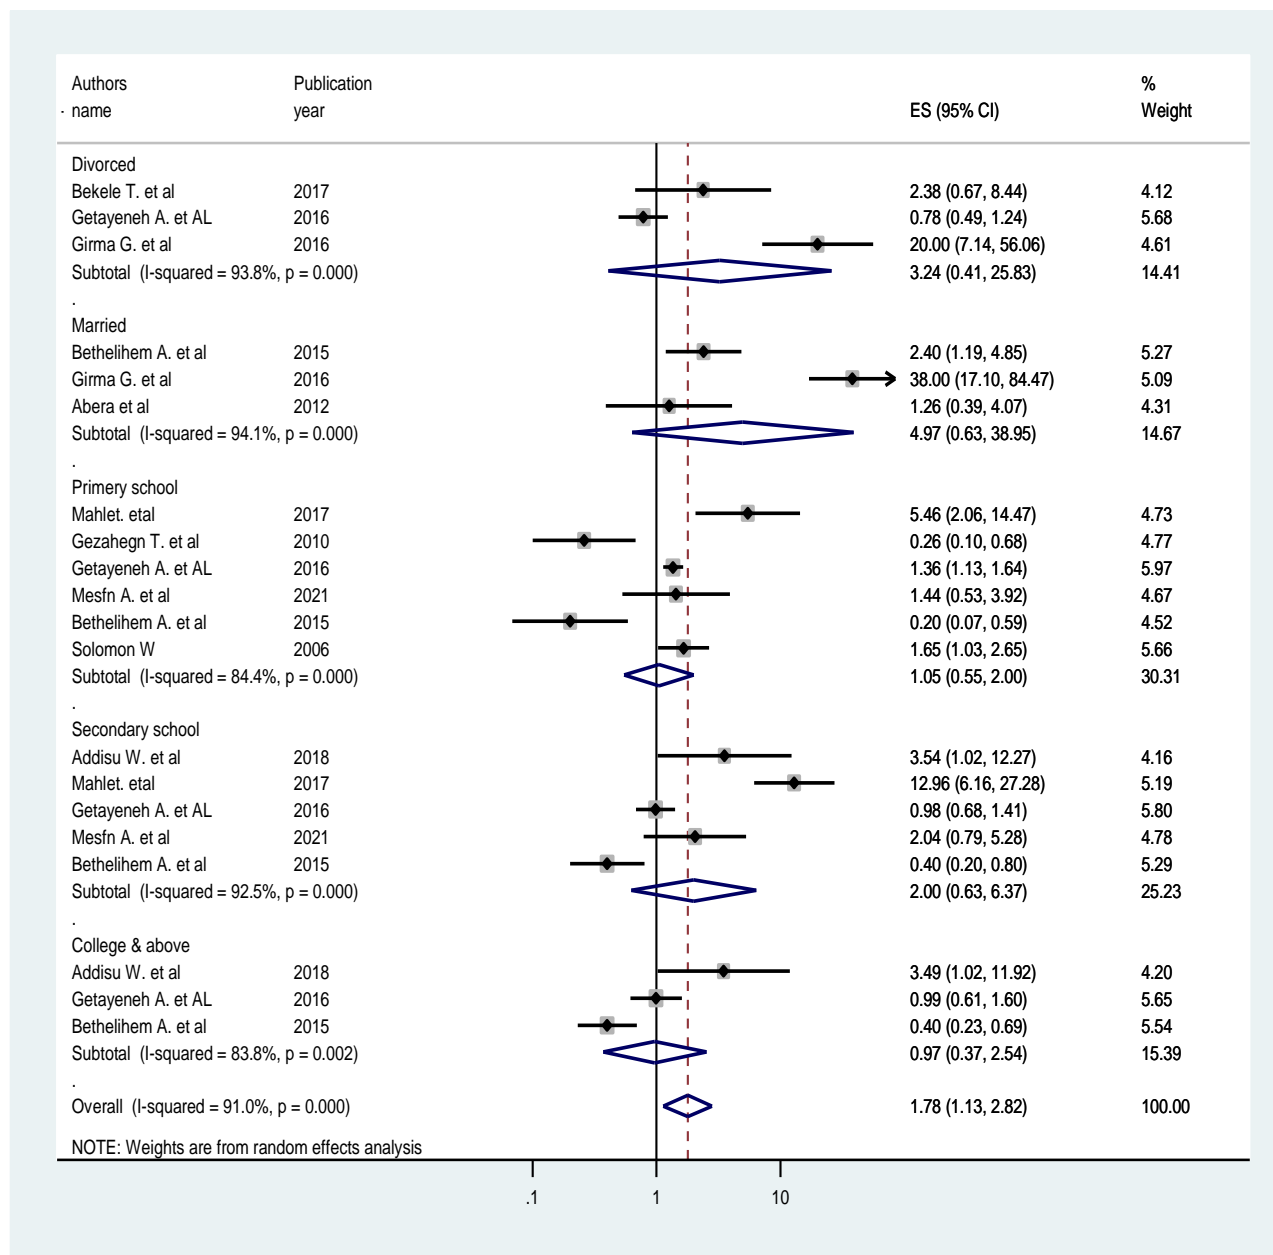

Figure-9: Forest plot of odds ratio for the association of selected socio-demographic characteristics and pregnancy termination in Ethiopia, 2023

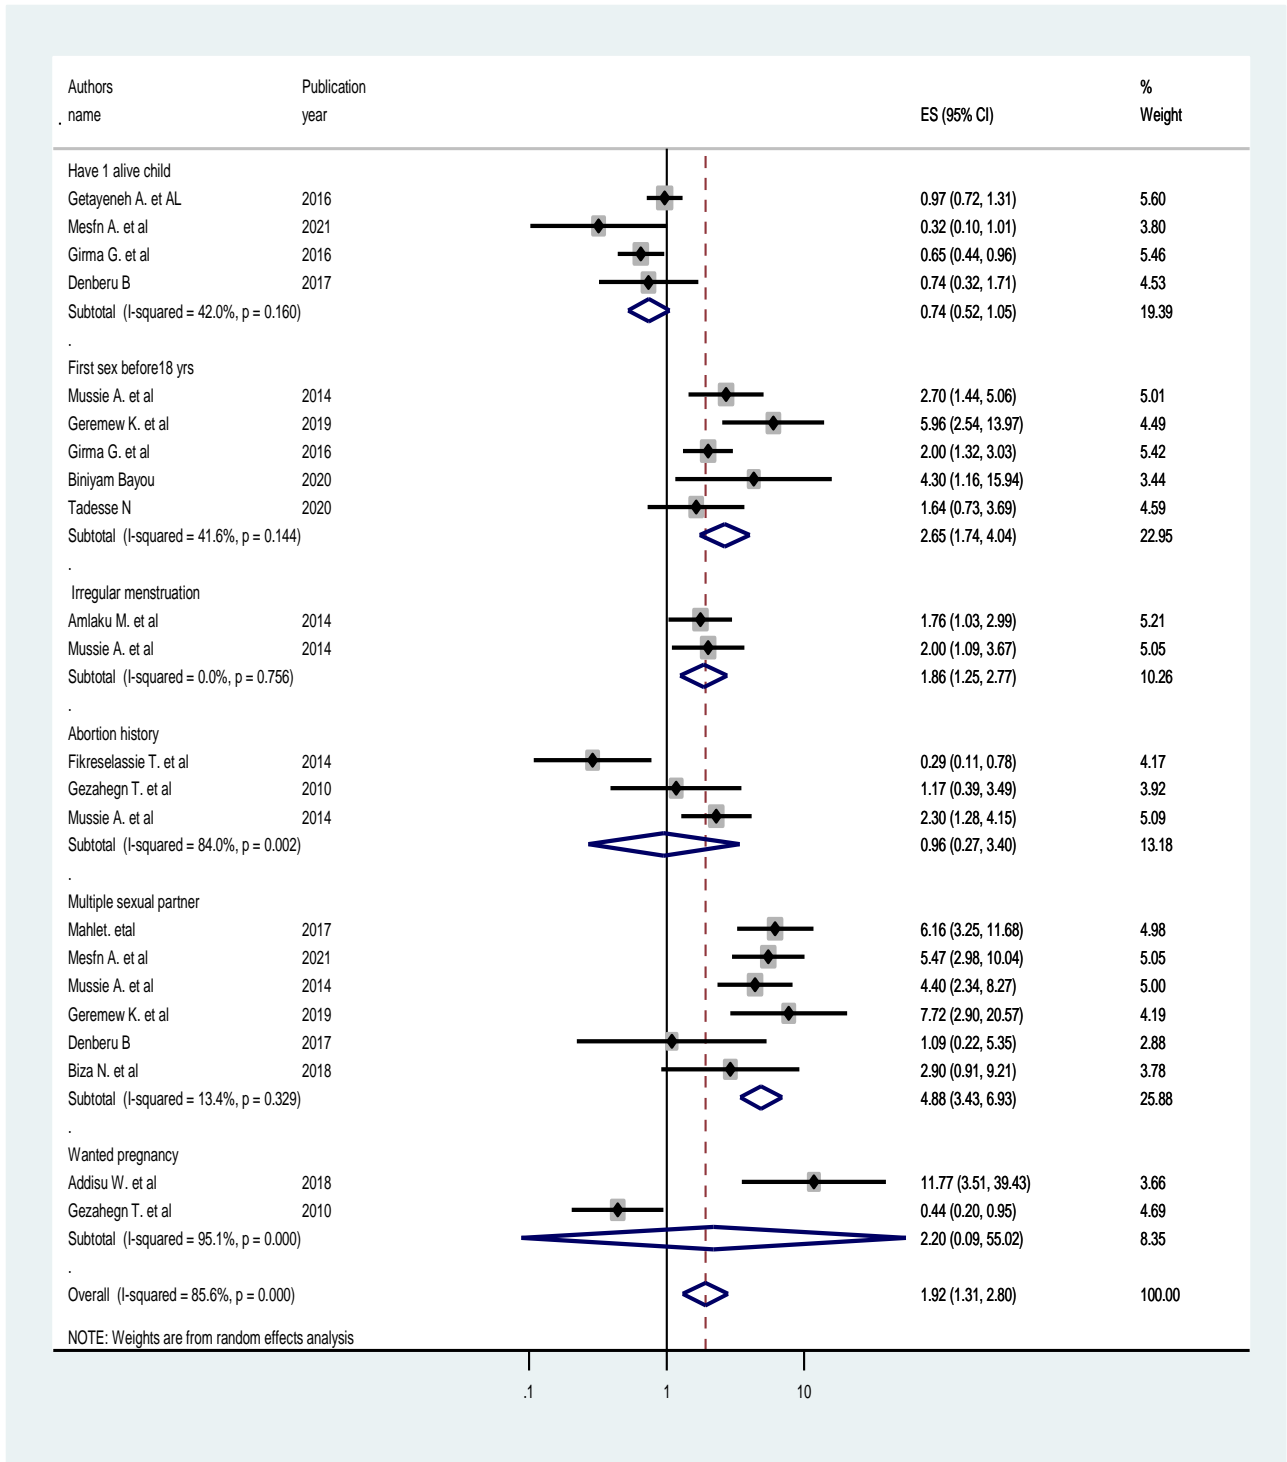

Figure-10: Forest plot of odds ratio for the association of selected reproductive characteristics and pregnancy termination in Ethiopia, 2023

# BMJ Open

## Prevalence and determinants of pregnancy termination in Ethiopia: A systematic review and meta-analysis

|                                 |                                                                                                                                                                                                                                                  |
|---------------------------------|--------------------------------------------------------------------------------------------------------------------------------------------------------------------------------------------------------------------------------------------------|
| Journal:                        | <i>BMJ Open</i>                                                                                                                                                                                                                                  |
| Manuscript ID                   | bmjopen-2023-073799.R1                                                                                                                                                                                                                           |
| Article Type:                   | Original research                                                                                                                                                                                                                                |
| Date Submitted by the Author:   | 03-Oct-2023                                                                                                                                                                                                                                      |
| Complete List of Authors:       | Kumsa, Henok; Woldia University<br>Arage, Mulugeta; Woldia University, Midwifery<br>Misl, Esuyawkal; Woldia University, Midwifery<br>Kidie, Atitegeb; Woldia University<br>Hailu, Tilahun; Woldia University<br>tenaw, lebeza; Woldia University |
| <b>Primary Subject Heading</b>: | Obstetrics and gynaecology                                                                                                                                                                                                                       |
| Secondary Subject Heading:      | Sexual health, Reproductive medicine, Public health                                                                                                                                                                                              |
| Keywords:                       | Adolescent, Public health < INFECTIOUS DISEASES, Sexual and Gender Minorities                                                                                                                                                                    |
|                                 |                                                                                                                                                                                                                                                  |

SCHOLARONE™  
Manuscripts



I, the Submitting Author has the right to grant and does grant on behalf of all authors of the Work (as defined in the below author licence), an exclusive licence and/or a non-exclusive licence for contributions from authors who are: i) UK Crown employees; ii) where BMJ has agreed a CC-BY licence shall apply, and/or iii) in accordance with the terms applicable for US Federal Government officers or employees acting as part of their official duties; on a worldwide, perpetual, irrevocable, royalty-free basis to BMJ Publishing Group Ltd ("BMJ") its licensees and where the relevant Journal is co-owned by BMJ to the co-owners of the Journal, to publish the Work in this journal and any other BMJ products and to exploit all rights, as set out in our [licence](#).

The Submitting Author accepts and understands that any supply made under these terms is made by BMJ to the Submitting Author unless you are acting as an employee on behalf of your employer or a postgraduate student of an affiliated institution which is paying any applicable article publishing charge ("APC") for Open Access articles. Where the Submitting Author wishes to make the Work available on an Open Access basis (and intends to pay the relevant APC), the terms of reuse of such Open Access shall be governed by a Creative Commons licence – details of these licences and which [Creative Commons](#) licence will apply to this Work are set out in our licence referred to above.

Other than as permitted in any relevant BMJ Author's Self Archiving Policies, I confirm this Work has not been accepted for publication elsewhere, is not being considered for publication elsewhere and does not duplicate material already published. I confirm all authors consent to publication of this Work and authorise the granting of this licence.

1  
2  
3 **Prevalence and determinants of pregnancy termination in Ethiopia: A systematic review**  
4 **and meta-analysis**  
5

6  
7 Henok Kumsa<sup>1</sup>, Esuyawkal Mislu<sup>1</sup>, Wodaje Mulugeta Arage<sup>1</sup>, Atitegeb Abera<sup>2</sup>, Tilahun Hailu<sup>2</sup>,  
8 and Lebeza Alemu Tenaw<sup>2</sup>  
9

10  
11  
12 *Affiliations* invaluable  
13

14 <sup>1</sup>School of Midwifery, College of Health Science, Woldia University, Ethiopia  
15

16  
17 <sup>2</sup>School of Public health, College of Health Science, Woldia University, Ethiopia  
18

19  
20 Email Address

21 HK: [henokkumsa@gmail.com](mailto:henokkumsa@gmail.com)  
22

23 EM: [esuyawkalmislu@gmail.com](mailto:esuyawkalmislu@gmail.com)  
24

25 MWA: [mulewodaje@gmail.com](mailto:mulewodaje@gmail.com)  
26

27 AA: [atitegebabera@gmail.com](mailto:atitegebabera@gmail.com)  
28

29 TH: [lemaryam01@gmail.com](mailto:lemaryam01@gmail.com)  
30

31 LAT: [lebezaa@gmail.com](mailto:lebezaa@gmail.com)  
32

33 \*Corresponding author: Lebeza Alemu Tenaw  
34

35 Email: [lebezaa@gmail.com](mailto:lebezaa@gmail.com)  
36  
37  
38  
39  
40  
41  
42  
43  
44  
45  
46  
47  
48  
49  
50  
51  
52  
53  
54  
55  
56  
57  
58  
59  
60

## Abstract

Objective: This review aims to determine the prevalence of pregnancy termination and its determinant factors in Ethiopia.

Data sources: Relevant articles were retrieved from PubMed, EMBASE, Medline, and other search engines.

Eligibility criteria for selecting studies: The research design for this study had no restrictions, allowing for the inclusion of cross-sectional and case-control studies that examined the prevalence or determinants of pregnancy termination. However, case reports, case series, reviews, editorials, and studies published as abstracts only were excluded from the analysis.

Data extraction and synthesis: The review precisely in accordance with PRISMA criteria, and the quality of the review was assessed using the Joanna Briggs Institute critical appraisal checklist. Heterogeneity was indicated by the p-value for I2 statistics less than 0.05. Data were entered into Microsoft Excel, and the analysis was conducted using Stata 16.

Results: The pooled prevalence pregnancy termination in Ethiopia was 21.52% (95% CI: 15.01, 28.03). Women who had their first sexual initiation before the age of 18 (OR = 1.78; 95% CI = 1.13, 2.82, P=0.144), had irregular menstrual bleeding (OR = 1.86; 95% CI = 1.25, 2.77, P=0.756), being a student (OR: 4.85; 95% CI: 1.98, 11.91, P=0.201), and had multiple sexual partners (OR: 4.88; 95% CI: 3.43, 6.93, P=0.329) were significantly associated with pregnancy termination.

Conclusions: One in five women terminated their pregnancies, which is higher than in other sub-Saharan countries. Being a student, irregular menstrual bleeding, early initiation of sexual intercourse, and multiple sexual partners were determinants of pregnancy termination. Special attention is needed in avoiding early sexual initiation and in reducing sexual risk behaviors.

Strength and limitation of this review:

- Both published and unpublished literature are included in this study.
- The authors extracted the whole literature separately to ensure data quality
- The review includes only observational studies

**Keywords:** Pregnancy termination, Determinantss, Systematic review and meta analysis, Ethiopia

## Introduction

Pregnancy termination is a delicate and divisive determinants topic having political, cultural, moral, and religious implications. Also, it presents a significant public health concern in developing countries (1). Above 60% of unintended pregnancies result in pregnancy termination, with the majority of those being unsafe (2). Developing countries bear the burden of 97% of all unsafe abortions which contributes to 220 deaths per 100,000 live births (3).

Moreover, pregnancy termination imposes an additional burden on health institutions and individuals; in developing countries alone, each year an estimated 7 million women seek treatment in health facilities for the complication of pregnancy termination (4). It is estimated that health-care systems will spend \$553 million per year on post-abortion complications and will lose \$922 million in income due to long-term disability caused by unsafe termination (5). Additionally, a woman who undergo pregnancy termination, particularly through methods such as mechanical dilation and curettage, face an increased risk of experiencing preterm birth and repeated pregnancy loss (6).

Though the burden of pregnancy termination in Ethiopia is a significant contributor to maternal mortality and morbidity (7). Previous studies conducted in Ethiopia have shown that the prevalence of pregnancy termination and its negative consequences are increasing over time (8, 9), and repeated pregnancy termination also accounts significant amount (10-12). Several variables, including early age marriage, low level of education, early sexual intercourse initiation, violence/rape, emotional well-being, educational status, employment status, and resources, and sexual intercourse relationship, have been implicated as factors of pregnancy termination in studies conducted across Ethiopia (13-16).

However, at the national level, illustrative evidence is lacking in Ethiopia regarding the level and underlying factors of pregnancy termination. Thus, this systematic review and meta-analysis aimed to assess the prevalence of pregnancy termination and its determinant factors in Ethiopia. The findings of this study provide evidence for intervention to reduce the burden of pregnancy termination, its complications, and its economic impact in the country. Additionally, this study will help to design strategies and monitor the progress of programs aimed at achieving the maternal mortality reduction targets of the sustainable development goals.

## Methods

### Study design and setting

This systematic review and meta-analysis included cross sectional, and case control studies which has been conducted in Ethiopia. Systematic review and meta-analysis using computerized databases; searches were performed to estimate the prevalence and identify the determinants of pregnancy termination in Ethiopia.

### Search strategy

For this review, a comprehensive search was conducted using various searching strategies to identify relevant articles. Published articles were searched in well-known online databases including EMBASE, Medline, Google, PubMed, Google Scholar, African Journal Online, and Science Direct databases. Additionally, the search was expanded by examining the reference lists of eligible articles to retrieve and extract potential articles. This systematic review was conducted using the preferred reporting items for systematic Reviews and Meta-Analyses PRISMA guidelines. Similarly, the quality of our systematic review and meta-analysis was assessed using the Joanna Briggs Institute (JBI) critical appraisal checklist (17).

Searching was done by using Medical Subject Heading (MeSH) terms related with determinants of pregnancy termination. MeSH terms enables us to select related research articles. We conducted the search for terms using Boolean operators "AND" and "OR," both separately and in combinations. We used the search terms “((((((Abortion) OR (termination of pregnancy)) OR (miscarriage)) AND (determinant factors)) OR (determinants)) OR (associated factors)) OR (influencing factors)) AND (Amhara) OR (Oromia) OR (Tigray) OR (Southern nation, nationalities and people’s) OR (Afar) OR (Benshagul gumuz) OR (Gamabella) OR (Somali) OR (Dire dawa) OR (Addis Ababa) OR (Hareri) OR (Ethiopia)”.

### Eligibility criteria

#### Inclusion criteria

There were no restrictions on research design. We included cross-sectional and case-control studies that showed the prevalence of or determinants of pregnancy termination. Additionally, Only articles reported in the English language and conducted studies until February 2023 were included.



### **Exclusion criteria**

Case reports, case series, reviews, editorials, and studies published as abstracts only were excluded. Agreements on the inclusion and exclusion of the articles were held through the participation of all authors.

### **Quality assessment and data extraction**

Articles were screened using their titles, abstracts, and full paper reviews before being included in the meta-analysis. The quality of included studies was evaluated using the Joanna Briggs Institute (JBI) critical appraisal checklist (17). The quality scores of included studies were assessed and presented using the mean scores to designate them as high- or low-quality. The JBI tool for prevalence and determinat studies was used as a guideline for data extraction from the final selected articles. The data extraction tool contains information on the author and year of the study, the title, the year the study was conducted and the year of publication, the study area and region, the study design and type, the study population, the sample size, the response rate, the outcome measured, and the prevalence and determinats of pregnancy termination. Moreover, all authors independently reviewed the titles and abstracts of studies to be included in this systematic review and meta-analysis. Agreements on the inclusion and exclusion of the articles were reached with the participation of all authors.

### **Measurement of the outcome variable**

In this study, termination of pregnancy is the removal of pregnancy tissue, conception products, or fetus, and placenta from the uterus. The term 'fetus' and 'placenta' is commonly used after eight weeks of pregnancy. Pregnancy tissue and products of conception are the tissues that are produced by the union of an egg and sperm before eight weeks. Terminating a pregnancy is a deliberate action taken by a health professional or the woman herself (18).

### **Registration and protocol**

This review has not previously registered or prepared a protocol. As a result, no adjustments have been made.

**Patient and Public Involvement:** not applicable

### Statistical methods and analysis

The meta-analysis was conducted using Stata 16 software after entering data into Microsoft Excel. Forest plots were used to demonstrate the prevalence of pregnancy termination in Ethiopia. The random effect model of analysis was utilized as a method of meta-analysis to minimize the heterogeneity of included studies (19). The study setting, population, and study period were used to conduct sub-group analysis. The presentation of pregnancy termination determinants was based on odds ratios (ORs) with a 95% confidence interval(CI).

The heterogeneity of the studies included was assessed using the I<sup>2</sup> statistics. The presence of heterogeneity was determined by using a p-value for I<sup>2</sup> statistics that was less than 0.05. Based on the I<sup>2</sup> test statistics results, the heterogeneity is categorized as low (25%), moderate (50%), and high (75%) (19). Furthermore, the Egger regression asymmetry test was used to evaluate the publication bias (20, 21). When the Egger test result's P-value is less than 0.05, there is a declaration of publication bias. The Duval and Tweedie nonparametric trim and fill analysis using the random effect analysis was conducted to detect the presence of publication bias (22).

## Result

### Study selection

This systematic review and meta-analysis included published studies on the termination of pregnancy in Ethiopia. A total of 12,242 records were retrieved through electronic database searching, and only 33 articles were included in the final analysis (Figure 1).

### Characteristics of included studies

This review included Thirty-three studies conducted in various regions of Ethiopia. Of all the studies, 8 (24.24%) were from the Amhara Region (11, 12, 15, 16, 23-26), South Nations and Nationalities Peoples accounted for 9 (27.27%) of the total (13, 27-34), 1 was from Oromia (35), 5 (15.15%) from Addis Ababa city administration (10, 14, 36-38), 3 (9.09%) were from Harari region (39-41), 3 (9.09%) were from Tigray region (42-44), 1 (3.03%) was from Afar region (45), 3 (9.09) were from National data (46-48). Twenty-eight (84.85%) of the included articles were cross-sectional studies (10-13, 15, 23-31, 33-35, 37-42, 44-48), and remains five (15.15%) were case-control studies(14, 16, 32, 36, 43) (**supplementary material 1**).

As well, twenty-seven of the studies were institution-based (10-16, 24, 27-33, 35-46), while six were community-based studies(23, 25, 26, 34, 47, 48). The sample size of the included studies ranged from a minimum of 124 in a study conducted in southwest Ethiopia (34) and and to a maximum of 12,378 in a study conducted using DHS data (48). Overall, a total of 40,116 study participants were included in this review.

### Prevalence of pregnancy termination in Ethiopia

Based on the random effect model, the overall pooled prevalence of termination of pregnancy among women in Ethiopia was 21.52% (95% CI: 15.01–28.03). The meta-analysis included studies with significant heterogeneity: I<sup>2</sup> value of 99.8%,  $p < 0.000$ . Publication biases among the included studies were examined using funnel plots and Egger's regression test. The results of funnel plots showed an asymmetric shape, which indicates the presence of publication bias among those included studies. Additionally, the Duval and Tweedie nonparametric trim and fill analysis was applied to correct publication bias among the studies, but no trimming was performed since the data is unchanged (**supplementary material 2**).

1  
2  
3  
4  
5  
6 Objective assessments of publication bias by Egger's regression test also showed the presence of  
7 publication bias across studies ( $p$ -value < 0.001). After conducting the trim and fill analysis to  
8 address publication bias, the final pooled prevalence of pregnancy termination in Ethiopia was  
9 adjusted to 21.52% (95% CI: 15.01–28.03) (**supplementary material 2**).

### 12 13 **Subgroup analysis**

14  
15 We performed subgroup analysis based on the region, study population, and study setting of the  
16 included studies. Table 1 shows the pooled prevalence was highest, 35.60% (95% CI: 28.86,  
17 42.34) in the Oromia region, followed by 34.17% (95% CI: 17.67, 86.01) in the Tigray region,  
18 24.63% (95% CI: 10.52, 37.75) in the South Nation and Nationalities People Region, and the  
19 lowest was seen in three studies conducted using demographic health data, 12.10% (95% CI:  
20 5.66, 18.50) (**supplementary material 2**).

21  
22 Furthermore, subgroup analysis reveals that the highest pooled prevalence of abortion was seen  
23 among gynecological admitted patients, at 60.60% (95% CI: 59.47, 61.73), followed by 25.38%  
24 (95% CI: 9.39, 41.32) among university/college students, and 27.90% (95% CI: 20.01, 35.79)  
25 among insecurely housed women, with the lowest pooled prevalence being seen among pregnant  
26 women and youth women. Additionally, subgroup analysis was conducted based on the year  
27 before and after the Millennium Development Goals' implementation. The pooled prevalence of  
28 pregnancy termination before and after MDGs was 20.55% (95% CI: 16.10–24.99) and 21.61%  
29 (95% CI: 15.01–28.03), respectively (**supplementary material 2**).

Table 1: Subgroup analysis for the prevalence of pregnancy termination in Ethiopia, 2004-2022

| Subgroup                      | Number of studies | Total Sample | Prevalence (95%CI)          | Heterogeneity  |                   |
|-------------------------------|-------------------|--------------|-----------------------------|----------------|-------------------|
|                               |                   |              |                             | I <sup>2</sup> | p-value           |
| <b>By region</b>              |                   |              |                             |                |                   |
| Addis Ababa                   | 2                 | 855          | 25.49(10.39, 40.09)         | 92.4           | < 0.001           |
| Amhara                        | 6                 | 2371         | 18.06(6.27, 29.85)          | 99.0           | < 0.001           |
| SNNP                          | 8                 | 3678         | 24.63(95% CI: 10.52, 37.75) | 99.4           | < 0.001           |
| National Data                 | 3                 | 19854        | 12.10(5.70, 18.50)          | 99.7           | < 0.001           |
| Tigray                        | 2                 | 7463         | 34.17(17.6, 86.01)          | 99.9           | < 0.001           |
| Harari                        | 2                 | 1835         | 16.13(12.21, 20.05)         | 81.2           | < 0.001           |
| Oromia                        | 1                 | 194          | 35.60(28.86, 42.34)         | .              | .                 |
| Afar                          | 1                 | 509          | 8.80(6.34, 11.26)           | .              | .                 |
| <b>By publication year</b>    |                   |              |                             |                |                   |
| 2016 to 2022 (post MDG)       | 15                | 24234        | 20.55(16.10, 24.99)         | 99.3           | < 0.001           |
| Before MDG                    | 10                | 12525        | 22.61(4.55, 40.66)          | 99.9           | < 0.001           |
| <b>Study population</b>       |                   |              |                             |                |                   |
| Reproductive age              | 8                 | 4426         | 17.03(8.55, 25.52)          | 99.0           | < 0.001           |
| Pregnant women                | 1                 | 12378        | 8.90(8.40, 9.40)            | .              | .                 |
| Abortion care seeker          | 7                 | 2990         | 21.19(14.65, 27.72)         | 95.3           | < 0.001           |
| University or college student | 6                 | 3237         | 25.36(9.39, 41.32)          | 99.5           | < 0.001           |
| Gynecological patient         | 1                 | 7203         | 60.60(59.47, 61.73)         | .              | .                 |
| Youth women                   | 1                 | 6401         | 2.50(2.12, 2.88)            | .              | .                 |
| Insecurely housed women*      | 1                 | 124          | 27.90(20.01, 35.79)         | .              | .                 |
| <b>Total</b>                  | <b>25</b>         | <b>36759</b> | <b>21.52(15.01, 28.03)</b>  | <b>99.8</b>    | <b>&lt; 0.001</b> |

\*Insecurely household women: it means women who live or spend their time on the street.

## Determinants of pregnancy termination

### Socio-demographic characteristics

The sociodemographic factors included in this analysis were the place of residence, age, marital, occupational, and educational status of the women. A separate analysis was conducted for each variable. Finally, a meta-analysis of (16, 39) two studies showed that being a student was significantly associated with pregnancy termination (OR: 4.85; 95% CI: 1.98, 11.91). There was moderate heterogeneity ( $I^2 = 39\%$ ) (**supplementary material 2**).

### Reproductive characteristics

A total of 5 articles (15, 24, 28, 43, 47) were included to assess the association between first sexual initiation before the age of 18 and pregnancy termination. The pooled meta-analysis found that women who had their first sexual experience before the age of 18 were twice as likely as those who had their first sexual experience after the age of 18 to have their pregnancy terminated (OR = 1.78; 95% CI = 1.13, 2.82). There was moderate heterogeneity ( $I^2 = 41.6\%$ ). Moreover, two articles (11, 43) were also included to determine the association between irregular menstrual bleeding and pregnancy termination. The final pooled meta-analysis using data from the two articles found that pregnancy termination was nearly two times more likely to occur in women with irregular menstrual bleeding than in those who had regular menstrual bleeding, (OR = 1.86; 95% CI = 1.25, 2.77). Similarly, a meta-analysis of six studies (14, 15, 24, 32, 34, 43) showed that women who had multiple sexual partners were significantly associated with pregnancy termination (OR: 4.88; 95% CI: 3.43, 6.93). There was low heterogeneity ( $I^2 = 13.4\%$ ) (**supplementary material 2**).

## Discussion

Pregnancy termination is a major public health concern in Ethiopia (49). In this systematic review and meta-analysis, the overall magnitude of pregnancy termination was pooled from 25 published articles in Ethiopia, and significant determinants of pregnancy termination were identified using different articles. Being a student increased the rate of termination of pregnancy nearly five times. In addition, first sexual initiation before the age of 18, women with irregular menstrual bleeding, and multiple sexual partners were determinants of pregnancy termination in Ethiopia. The findings of this review revealed evidence to help reduce the impact of pregnancy termination in Ethiopia by aiming at the main determinants for pregnancy termination.

In Ethiopia various studies have been conducted on the issue of pregnancy termination, involving different settings such as the community, healthcare institutions, and higher education institutions. These studies have yielded varying figures regarding the prevalence of pregnancy termination in the country. However, this particular study revealed Ethiopia has a higher prevalence of pregnancy termination compared to other low- and middle-income countries.

The study found that the pooled prevalence of termination of pregnancy in Ethiopia was 21.52%. This finding is lower compared to a study done in Ghana at 25% (50), higher than in Mozambique at 9 % ( $\times 2.33$ ) (50), and in India at 1.7% ( $\times 12$ ) (51). The difference could be attributed to various factors like; study population, study design, study area, socio-demographic characteristics, and the differences in health policies of the countries. Additionally, the current study utilized a meta-analysis approach at the national level, incorporating community or institutional studies, while the study in Ghana and Mozambique was conducted using demographic health data with a small sample size compared to the current study (50). Additionally, in our study, huge variations were seen across the regions. A spatial analysis study conducted in Ethiopia using national DHS data also also showed variation even within the regions of the country (48). Thus, acting according to the needs of the region and age-specific policy is important during national policy or guideline development.

1  
2  
3 Our study observed that being a student was significantly associated with the termination of  
4 pregnancy. One of the possible explanations could be that students are likely to be adolescents,  
5 belonging to the younger age category. In addition, adolescent girls are remaining in school  
6 longer, which may factor into their decisions to postpone childbearing and terminate unintended  
7 pregnancies (52). Likewise, a study conducted in India shows the tendency for pregnancy  
8 termination is high in this age category since the rate of unintended pregnancies and unmet needs  
9 for family planning are high in this age group (53). The higher rate of pregnancy termination  
10 could also be attributed to a failure to provide education about the risks of pregnancy termination  
11 and ways of prevention for unintended pregnancy (54).  
12  
13  
14  
15  
16  
17  
18

19 Additionally, the idea supported by Van Rensburg that societal poverty, unemployment, and  
20 other socio-demographic factors affect youth pregnancies and it might prone to pregnancy  
21 termination (55). In addition, a review from the late 1990s found that young women often cited a  
22 desire to stay in school as a major reason for pregnancy termination (56). Moreover, many  
23 adolescents continue to have difficulty accessing contraception, often as a result of stigma and/or  
24 a lack of resources (57).  
25  
26  
27  
28  
29

30 The study from Nigeria indicated that 15–24-year old women are still being left behind on  
31 reproductive health matters despite increasing global attention to prioritizing their health (58).  
32 Studies found that educational programs aimed at reducing sexual risk behaviors and preventing  
33 pregnancy among young people can effectively reduce pregnancy rates among teenagers (59).  
34 Also, programs aimed at abstinence-centered sexuality education are effective in preventing  
35 adolescent pregnancy (60). Thus, this implies a future focus on reproductive health issues  
36 specific to students to address their needs. Additionally, future researchers should better focus on  
37 possible interventions to reduce the risk of pregnancy and pregnancy termination among students.  
38  
39  
40  
41  
42  
43  
44

45 This review also assessed the association of selected variables with pregnancy termination.  
46 Women under the age of 18 at first sex were significantly more likely to terminate their  
47 pregnancy. This finding is consistent with studies conducted in Nigeria and Peru that reported a  
48 higher rate of pregnancy termination among women who had their age at first sex before 18  
49 years old (61-63). Studies also revealed that early sexual debuts are significantly associated with  
50 adolescent pregnancies, which are usually unwanted (64, 65). As well, a study conducted in  
51  
52  
53  
54  
55  
56  
57  
58  
59  
60



1  
2  
3 Ethiopia shown initiation of sexual intercourse before the age of 18 years was found significant  
4 association with repeated pregnancy termination (66).  
5  
6

7 In many low income countries, rising ages at first marriage combined with increasing levels of  
8 premarital sex continue to result in unintended pregnancies among adolescents (67). Thus,  
9 improving the knowledge of adolescents about sexual and reproductive health issues, and  
10 increasing contraceptive access and use among young people, are important to prevent unsafe  
11 abortion or pregnancy termination (68). This necessitates the development of reproductive health  
12 education specifically for adolescent girls. Future researchers should also address the gap in  
13 studies on the needs of adolescent girls and possible interventions needed to reduce sexual  
14 initiation before the age of 18 years.  
15  
16

17 Furthermore, at the individual level, we found that pregnancy termination was significantly  
18 associated with women who had multiple sexual partners. Likewise, a study conducted in Peru  
19 indicated that as the number of sexual partners increased, the odds of getting a pregnancy  
20 termination increased (69). Studies conducted in Cambodia, China, and the United Kingdom also  
21 have found that having multiple sexual partners is associated with a higher rate of repeated  
22 pregnancy termination. (54, 70, 71). The government shall be emphasized reproductive health  
23 education, particularly for women regarding the risks of multiple sexual partners, the access  
24 where, and how to get counseling on how to prevent pregnancy.  
25  
26

27 This study also found that pregnancy termination was two times higher among women who had  
28 menstrual irregularities compared to their counterparts. Lastly, this systematic review and meta-  
29 analysis indicated that there were no statistical association between the termination of pregnancy  
30 and rural residents, marital status, women's age, educational status, primiparous, history of  
31 abortion, and wanted pregnancy.  
32  
33

34 As a limitation, this finding might be prone to the risk of bias due to the significant heterogeneity  
35 of articles included from a different region of Ethiopia. In addition, differences in the study  
36 population, setting, and design within the included studies might influence the results of this  
37 review. Moreover, studies conducted in health institutions, Colleges, or higher education might  
38 affect the pooled estimates. Additionally, in this review, only published articles were included.  
39  
40  
41  
42  
43  
44  
45

1  
2  
3 Also, this review didn't include qualitative studies on the explanations for pregnancy  
4 termination.  
5  
6

7  
8 Future research must explain the relationship between pregnancy termination and other  
9 determinants such as social, economic, substance use, peer pressure, alcohol use, sexual or  
10 physical violence, and knowledge of sexual and reproductive health issues such as family  
11 planning and fertility.  
12  
13  
14

## 15 16 **Conclusions**

17  
18 One in every five women had their pregnancies terminated, which is a high rate when compared  
19 to Sub-Saharan countries. Being a student was significantly associated with the termination of a  
20 pregnancy. In addition, irregular menstrual bleeding, early initiation of sexual intercourse, and  
21 multiple sexual partners were important determinants of pregnancy termination.  
22  
23  
24  
25

26  
27 **Abbreviations:** OR: odds ratios; CI: confidence interval; JBI: Joanna Briggs Institute; MDG:  
28 Millennium Development Goals'  
29  
30

## 31 32 **Declarations**

33 **Ethical approval:** This article was conducted using published articles. Therefore, it don't  
34 required ethical approval.  
35

36 **Funding:** No funding was used in this study.  
37

38 **Availability of data and materials:** The datasets used and analyzed during the review are  
39 available from the corresponding author upon reasonable request.  
40  
41

42 **Competing interests:** None declared.

43 **Author contributions:** HK, MWA, AB, EM, TH, and LAT conducted the data curation and  
44 extraction. HK, LAT, EM, and MWA. wrote the original and final draft of the research. LAT, EM,  
45 MWA and HK were conducted formal analyses and data interpretation. All authors read and  
46 approved the final manuscript.  
47  
48  
49

50  
51 **Supplementary file :** The supplementary file contains the data extraction sheet for the study  
52 included in the review.  
53  
54  
55  
56  
57

## References

1. Mesce D, Clifto D. Abortion facts and figures; population reference bureau. Geneva: WHO. 2011.
2. Bearak J, Popinchalk A, Ganatra B, Moller A-B, Tunçalp Ö, Beavin C, et al. Unintended pregnancy and abortion by income, region, and the legal status of abortion: estimates from a comprehensive model for 1990–2019. *The Lancet Global Health*. 2020;8(9):e1152-e61.
3. Ganatra B, Gerdtts C, Rossier C, Johnson Jr BR, Tunçalp Ö, Assifi A, et al. Global, regional, and subregional classification of abortions by safety, 2010–14: estimates from a Bayesian hierarchical model. *The Lancet*. 2017;390(10110):2372-81.
4. Singh S, Maddow - Zimet I. Facility - based treatment for medical complications resulting from unsafe pregnancy termination in the developing world, 2012: a review of evidence from 26 countries. *BJOG: An International Journal of Obstetrics & Gynaecology*. 2016;123(9):1489-98.
5. Vlassoff M, Shearer J, Walker D, Lucas H. Economic impact of unsafe abortion-related morbidity and mortality: evidence and estimation challenges: Institute of Development Studies Brighton, UK; 2008.
6. DeCherney AH NL, Laufer N, Roman AS. Contraception and family, gynecology. pcdatioa, 2007. teUSTM-HC.
7. Ababa A. Federal democratic republic of Ethiopia ministry of health. Ethiopia: Postnatal Care. 2003.
8. Gebrehiwot Y, Fetters T, Gebreselassie H, Moore A, Hailemariam M, Dibaba Y, et al. Changes in Morbidity and Abortion Care in Ethiopia After Legal Reform: National Results from 2008 and 2014. *Int Perspect Sex Reprod Health*. 2016;42(3):121-30.
9. Singh S, Fetters T, Gebreselassie H, Abdella A, Gebrehiwot Y, Kumbi S, et al. The estimated incidence of induced abortion in Ethiopia, 2008. *International perspectives on sexual and reproductive health*. 2010:16-25.
10. Alemayehu B, Addissie A, Ayele W, Tiroro S, Woldeyohannes D. Magnitude and associated factors of repeat induced abortion among reproductive age group women who seeks abortion Care Services at Marie Stopes International Ethiopia Clinics in Addis Ababa, Ethiopia. *Reproductive health*. 2019;16(1):1-10.
11. Mulat A, Bayu H, Mellie H, Alemu A. Induced second trimester abortion and associated factors in Amhara region referral hospitals. *BioMed research international*. 2015;2015:256534.
12. Tesfaye B, Tewabe M, Ferede A, Dawson A. Induced second trimester abortion and associated factors at debre Markos referral hospital: cross-sectional study. *Women's Health*. 2020;16:1745506520929546.
13. Tesfaye G, Hambisa MT, Semahegn A. Induced abortion and associated factors in health facilities of Guraghe zone, southern Ethiopia. *Journal of pregnancy*. 2014;2014.
14. Denberu B, Alemseged F, Segni H. Determinants of abortion among youth seeking reproductive health Care in Selected Health Facilities, in Addis Ababa, Ethiopia. *Global Journal of Reproductive Medicine*. 2017;1(2):27-38.
15. Behulu GK, Fenta EA, Aynalem GL. Repeat induced abortion and associated factors among reproductive age women who seek abortion services in Debre Berhan town health institutions, Central Ethiopia, 2019. *BMC research notes*. 2019;12(1):1-5.
16. Tilahun F, Dadi AF, Shiferaw G. Determinants of abortion among clients coming for abortion service at felegehiwot referral hospital, northwest Ethiopia: a case control study. *Contraception and reproductive medicine*. 2017;2(1):1-6.
17. Aromataris E, Munn Z. Joanna Briggs Institute reviewer's manual. The Joanna Briggs Institute. 2017;2018.
18. 2014 KAAOBAftooARA.

19. Higgins JP, Thompson SG, Deeks JJ, Altman DG. Measuring inconsistency in meta-analyses. *Bmj*. 2003;327(7414):557-60.
20. Begg CB, Mazumdar M. Operating characteristics of a rank correlation test for publication bias. *Biometrics*. 1994;1088-101.
21. Egger M, Smith GD, Schneider M, Minder C. Bias in meta-analysis detected by a simple, graphical test. *Bmj*. 1997;315(7109):629-34.
22. Duval S, Tweedie R. A nonparametric "trim and fill" method of accounting for publication bias in meta-analysis. *Journal of the american statistical association*. 2000;95(449):89-98.
23. Ayenew G, Gedefaw M, Berhe R, Nigusie A. Current Status, and Correlates of Abortion among Rural Women of Gonji Kollala District, Northwest Ethiopia. *Open Journal of Epidemiology*. 2015;5:136-46.
24. Waktola MI, Mekonen DG, Nigussie TS, Cherkose EA, Abate AT. Repeat induced abortion and associated factors among women seeking abortion care services at Debre Markos town health institutions, Amhara regional state, Ethiopia, 2017. *BMC Res Notes*. 2020;13(1):44-.
25. Mariam T, Melkamu S, Yetwale F, Abdela M, Getnet M. Prevalence and Associated Factors of Unsafe Abortion among Women of Reproductive Age Group in Gondar Town, Northwest Ethiopia, 2017: A Community-based Cross-sectional Study. *Journal of Advances in Medicine and Medical Research*. 2018;28:1-7.
26. Getahun H, Berhane Y. Abortion among rural women in north Ethiopia. *International Journal of Gynecology & Obstetrics*. 2000;71(3):265-6.
27. Animaw W, Bogale B. Abortion in university and college female students of Arba Minch town, Ethiopia, 2011. *Sexual & Reproductive Healthcare*. 2014;5(1):17-22.
28. Beyene BB, Meshesha B. Magnitude And Associated Factors Of Induced Abortion Among Regular Undergraduate Students Of Dilla University. *International journal of scientific and research publications*. 2020;10:10032.
29. Sahile A, Shiferaw M. Magnitude of Induced Abortion and Associated Factors among Female Students of Hawassa University, Southern Region, Ethiopia, 2019. *Journal of pregnancy*. 2020;2020:1-6.
30. Gelaye AA, Taye KN, Mekonen T. Magnitude and risk factors of abortion among regular female students in Wolaita Sodo University, Ethiopia. *BMC Women's Health*. 2014;14(1):50.
31. Nigussie T, Feyisa M, Yosef T, Berhanu M, Asefa A. Prevalence of induced abortion and its associated factors among female students of health science in South West Ethiopia. *The Open Nursing Journal*. 2020;14(1).
32. Abebe M, Mersha A, Degefa N, Gebremeskel F, Kefelew E, Molla W. Determinants of induced abortion among women received maternal health care services in public hospitals of Arba Minch and Wolayita Sodo town, southern Ethiopia: unmatched case-control study. *BMC women's health*. 2022;22(1):1-12.
33. Lentiro K, Gebru T, Worku A, Asfaw A, Gebremariam T, Tesfaye A. Risk factors of induced abortion among preparatory school student in Guraghe zone, Southern region, Ethiopia: a cross-sectional study. *BMC Women's Health*. 2019;19(1):1-7.
34. Alemu K, Birhanu S, Fekadu L, Endale F, Tamene A, Habte A. Safe abortion service utilization and associated factors among insecurely housed women who experienced abortion in southwest Ethiopia, 2021: A community-based cross-sectional study. *Plos one*. 2022;17(8):e0272939.
35. Gebeyehu D, Admassu B, Sinega M, Haile M. Assessment of Prevalence and Reasons for Termination of Pregnancy at Jimma University Teaching Hospital, Ethiopia. *Universal Journal of Public Health*. 2015;3:251-5.
36. Megersa BS, Ojengbede OA, Deckert A, Fawole OI. Factors associated with induced abortion among women of reproductive age attending selected health facilities in Addis Ababa, Ethiopia: a case control study. *BMC Women's Health*. 2020;20(1):1-11.

37. Wassie AY, Lemlem SB, Boka A. Knowledge, Practice and Associated Factors Towards Medication Abortion Among Reproductive-Age Women in Sexual and Reproductive Health Clinics of Addis Ababa, Ethiopia, 2018: Cross-Sectional Study. *International Journal of Women's Health*. 2021;13:489.
38. Bulti F, Gela D, Dinagde N. Knowledge of Safe Abortion Care Services and Associated Factors Among Women of Reproductive Age Working at Non-Health Sector Public Institutions in Addis Ababa, Ethiopia. 2021.
39. Jamie AH, Abdosh MZ. Prevalence of induced abortion and associated factors among women of reproductive age in Harari region, Ethiopia. *Public Health of Indonesia*. 2020;6(2):35-40.
40. Mohammed M, Wesenu M. Prevalence and determinants associated with second trimester termination of pregnancy in Harari city, Ethiopia; Cross sectional study. 2021.
41. Worku S, Fantahun M. Unintended pregnancy and induced abortion in a town with accessible family planning services: the case of Harar in eastern Ethiopia. *Ethiopian Journal of Health Development*. 2006;20(2):79-83.
42. Abera GB, Berhanu B, Kahsay AB, Gebru HB, Aregay A. Assessment of determinants of induced abortion among child bearing age women attending maternal and child health clinic in Mekelle town, Tigray, Ethiopia: a cross sectional study. *International Journal of Pharmaceutical Sciences and Research*. 2012;3(12):4745.
43. Alemayehu M, Yebyo H, Medhanyie AA, Bayray A, Fantahun M, Goba GK. Determinants of repeated abortion among women of reproductive age attending health facilities in Northern Ethiopia: a case-control study. *BMC Public Health*. 2017;17(1):1-8.
44. Gessesew A. Abortion and unwanted pregnancy in Adigrat zonal hospital, Tigray, north Ethiopia. *African journal of reproductive health*. 2010;14(3):183-8.
45. Biza N, Habib Y, Bayray A, Reddy PS. MAGNITUDE AND ASSOCIATED FACTORS OF ABORTION AMONG REGULAR FEMALE STUDENTS OF SAMARA UNIVERSITY, AFAR, ETHIOPIA, 2016. *Medico Research Chronicles*. 2018;5(3):191-201.
46. Mekbib T-A, Hiwot YG, Fantahun M. SURVEY OF UNSAFE ABORTION IN SELECTED HEALTH FACILITIES IN ETHIOPIA. *Ethiopian Journal of Reproductive Health*. 2007;1(1):11-.
47. Gilano G, Hailegebreal S. Determinants of abortion among youth 15–24 in Ethiopia: A multilevel analysis based on EDHS 2016. *PloS one*. 2021;16(3):e0248228.
48. Tesema GA, Mekonnen TH, Teshale AB. Spatial distribution and determinants of abortion among reproductive age women in Ethiopia, evidence from Ethiopian Demographic and Health Survey 2016 data: Spatial and mixed-effect analysis. *PloS one*. 2020;15(6):e0235382.
49. Abdella A. Maternal mortality trend in Ethiopia. *Ethiopian Journal of Health Development*. 2010;24(1).
50. Dickson KS, Adde KS, Ahinkorah BO. Socio-economic determinants of abortion among women in Mozambique and Ghana: evidence from demographic and health survey. *Archives of Public Health*. 2018;76(1):1-10.
51. Pallikadavath S, Stones RW. Maternal and social factors associated with abortion in India: a population-based study. *International Family Planning Perspectives*. 2006:120-5.
52. Grant MJ, Behrman JR. Gender gaps in educational attainment in less developed countries. *Population and development review*. 2010;36(1):71-89.
53. Jiang L, Hardee K. Women's education, family planning, or both? Application of multistate demographic projections in India. *International journal of population research*. 2014;2014.
54. Demographic E. Addis Ababa, Ethiopia, and Rockville. Maryland, MA, USA: CSA and ICF. 2016.
55. van Rensburg HC. South Africa's protracted struggle for equal distribution and equitable access—still not there. *Human resources for health*. 2014;12(1):1-16.
56. Bankole A, Singh S, Haas T. Reasons why women have induced abortions: evidence from 27 countries. *International family planning perspectives*. 1998:117-52.

- 1  
2  
3 57. Woog V, Susheela S, Alyssa B, Jesse P. Adolescent womens need for and use of sexual and  
4 reproductive health services in developing countries: Citeseer; 2015.
- 5 58. Onukwugha FI, Magadi MA, Sarki AM, Smith L. Trends in and predictors of pregnancy  
6 termination among 15–24 year-old women in Nigeria: a multi-level analysis of demographic and health  
7 surveys 2003–2018. *BMC Pregnancy and Childbirth*. 2020;20(1):550.
- 8 59. Coyle K, Basen-Enquis K, Kirby D, Parcel G, Banspach S, Collins JL, Baumler ER, Caravajal S,  
9 Harrist, RB. Safer Choices: Long-term impact of a multicomponent school-based HIV, STD, and pregnancy  
10 prevention program. *Public Health Reports*. 2001;116(Suppl 1):82-93.
- 11 60. Cabezón C, Vigil P, Rojas I, Leiva ME, Riquelme R, Aranda W, et al. Adolescent pregnancy  
12 prevention: An abstinence-centered randomized controlled intervention in a Chilean public high school.  
13 *Journal of Adolescent Health*. 2005;36(1):64-9.
- 14 61. Onukwugha FI, Magadi MA, Sarki AM, Smith L. Trends in and predictors of pregnancy  
15 termination among 15–24 year-old women in Nigeria: a multi-level analysis of demographic and health  
16 surveys 2003–2018. *BMC pregnancy and childbirth*. 2020;20(1):1-13.
- 17 62. Cadmus E, Owoaje E. Knowledge about complications and practice of abortion among female  
18 undergraduates in the University of Ibadan, Nigeria. *Annals of Ibadan postgraduate medicine*.  
19 2011;9(1):19-23.
- 20 63. Ahmed S, Ray R. Determinants of pregnancy and induced and spontaneous abortion in a jointly  
21 determined framework: evidence from a country-wide, district-level household survey in India. *Journal*  
22 *of biosocial science*. 2014;46(4):480-517.
- 23 64. Morhe ES, Tagbor HK, Ankobea FK, Danso KA. Reproductive experiences of teenagers in the  
24 Ejisu-Juabeng district of Ghana. *International Journal of Gynecology & Obstetrics*. 2012;118(2):137-40.
- 25 65. Mulugeta Y, Berhane Y. Factors associated with pre-marital sexual debut among unmarried high  
26 school female students in bahir Dar town, Ethiopia: cross-sectional study. *Reproductive health*.  
27 2014;11(1):1-6.
- 28 66. Mekie M, Addisu D, Dagnew E, Necho W. The level and deriving factors of repeat-induced  
29 abortion in Ethiopia: A systematic review and meta-analysis. *Heliyon*. 2021;7(1):e05984.
- 30 67. Wellings K, Collumbien M, Slaymaker E, Singh S, Hodges Z, Patel D, et al. Sexual behaviour in  
31 context: a global perspective. *The Lancet*. 2006;368(9548):1706-28.
- 32 68. WHO. Adolescent pregnancy fact sheet: World Health Organization; 2022 [updated 15  
33 September 2022. Available from: [https://www.who.int/en/news-room/fact-sheets/detail/adolescent-](https://www.who.int/en/news-room/fact-sheets/detail/adolescent-pregnancy)  
34 [pregnancy](https://www.who.int/en/news-room/fact-sheets/detail/adolescent-pregnancy).
- 35 69. Bernabé-Ortiz A, White PJ, Carcamo CP, Hughes JP, Gonzales MA, Garcia PJ, et al. Clandestine  
36 induced abortion: prevalence, incidence and risk factors among women in a Latin American country.  
37 *Cmaj*. 2009;180(3):298-304.
- 38 70. Cheng Y, Wang X, Lv Y, Cai Y, Li Y, Guo X, et al. Study on the risk factors of repeated abortion  
39 among unmarried adolescents. *Zhonghua liu xing bing xue za zhi= Zhonghua liuxingbingxue zazhi*.  
40 2006;27(8):669-72.
- 41 71. Yi S, Tuot S, Chhoun P, Pal K, Tith K, Brody C. Factors associated with induced abortion among  
42 female entertainment workers: a cross-sectional study in Cambodia. *BMJ open*. 2015;5(7):e007947.
- 43  
44  
45  
46  
47  
48  
49  
50  
51  
52  
53  
54  
55  
56  
57  
58  
59  
60

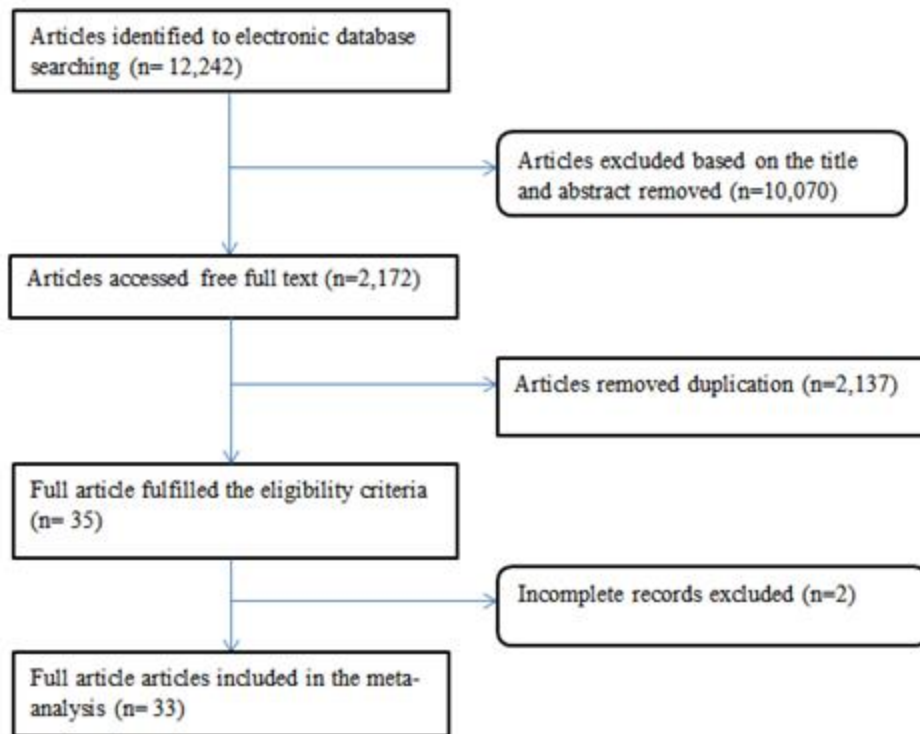

Figure 1. Flow chart of describing the selection of studies for the systematic review and meta-analysis of the prevalence of pregnancy termination and associated factors in Ethiopia, 2023

Table 2: Characteristics of the studies for the prevalence of pregnancy termination in Ethiopia, 2004-2022

| Authors name            | Publication year | Study area                       | Region        | Study design    | Study setting | Study population               | Sample size |
|-------------------------|------------------|----------------------------------|---------------|-----------------|---------------|--------------------------------|-------------|
| Addisu W. et al         | 2018             | Addis Ababa                      | Addis Ababa   | Cross-sectional | Institutional | Reproductive age group         | 423         |
| Mahlet T. et al.        | 2017             | Debre Markos                     | Amhara        | Cross-sectional | Institutional | Reproductive age group         | 567         |
| Fikreselassie T. et al. | 2014             | Bahr Dar                         | Amhara        | Case-control    | Institutional | Pregnant women                 | 175         |
| Gezahegn T. et al.      | 2010             | Guraghe Zone                     | SNNP          | Cross-sectional | Institutional | Abortion care service seekers  | 422         |
| Bekele T. et al.        | 2017             | Debre Markos                     | Amhara        | Cross-sectional | Institutional | Abortion care service seekers  | 262         |
| Getayeneh A. et al.     | 2016             | Ethiopia                         | National data | Cross-sectional | Community     | Pregnant women                 | 12378       |
| Addisu T. et al.        | 2019             | Hawassa                          | SNNP          | Cross-sectional | Institutional | University/College students    | 422         |
| Amlaku M. et al.        | 2014             | Amhara region referral hospitals | Amhara        | Cross-sectional | Institutional | Abortion care service seekers  | 422         |
| Birye D. et al.         | 2019             | Gondar                           | Amhara        | Cross-sectional | Institutional | University/College students    | 648         |
| Amanuel G. et al.       | 2004             | Adigrat                          | Tigray        | Cross-sectional | Institutional | Women with Gynecologic problem | 7203        |
| Endalew S. et al.       | 2021             | Addis Ababa                      | Addis Ababa   | Cross-sectional | Institutional | Reproductive age               | 432         |
| Worku A. et al.         | 2011             | Arba Minch                       | SNNP          | Cross-sectional | Institutional | University/College students    | 845         |
| Mesfn A. et al.         | 2021             | Arba minch & Wolayita Sodo town  | SNNP          | Case control    | Institutional | Reproductive age group         | 413         |
| Bethelihem A. et al.    | 2015             | Addis Ababa                      | Addis Ababa   | Cross-sectional | Institutional | Abortion care service seekers  | 429         |
| Mussie A. et al.        | 2014             | Tigray region health hospitals   | Tigray        | Case control    | Institutional | Abortion care service seekers  | 309         |



|                        |      |                                       |               |                 |               |                               |      |
|------------------------|------|---------------------------------------|---------------|-----------------|---------------|-------------------------------|------|
| Geremew K. et al.      | 2019 | Debre Berhan town health institutions | Amhara        | Cross-sectional | Institutional | Abortion care service seekers | 355  |
| Amha A. et al.         | 2011 | Hawassa University                    | SNNP*         | Cross-sectional | Institutional | University/College students   | 493  |
| Girma G. et al.        | 2016 | Ethiopia                              | National data | Cross-sectional | Community     | Youth women                   | 6401 |
| Kifle L. et al.        | 2017 | Guraghe zone                          | SNNP          | Cross-sectional | Institutional | Reproductive age              | 404  |
| Arif H. et al.         | 2020 | Harari                                | Harari        | Cross-sectional | Institutional | Reproductive age group        | 611  |
| Biniyam B. et al.      | 2020 | Dilla University                      | SNNPR         | Cross-sectional | Institutional | University/College students   | 548  |
| Denberu B. et al       | 2017 | Addis Ababa                           | Addis Ababa   | Case control    | Institutional | Youth women                   | 330  |
| Diriba G. et al.       | 2015 | Jimma                                 | Oromia        | Cross-sectional | Institutional | Abortion care service seekers | 194  |
| Girum M. et al.        | 2015 | Gonji Kollela District                | Amhara        | Cross-sectional | Community     | Reproductive age group        | 611  |
| Murad M. et al.        | 2020 | Harar                                 | Harari        | Cross-sectional | Institutional | Reproductive age group        | 835  |
| Tekleab M. et al.      | 2007 | Ethiopia                              | National data | Cross-sectional | Institutional | Abortion care service seekers | 1075 |
| Tadesse N. et al.      | 2020 | Mizan Tepi University                 | SNNP          | Cross-sectional | Institutional | University/College students   | 420  |
| Tesfamichael G. et al. | 2017 | Gondar                                | Amhara        | Cross-sectional | Community     | Reproductive age              | 154  |
| Kidist A. et al        | 2022 | Jimma, Bonga, and Mizan-Aman          | SNNPR         | Cross-sectional | Community     | Insecurely housed women       | 124  |
| Solomon W. et al       | 2006 | Harer                                 | Harari        | Cross-sectional | Community     | Reproductive age              | 1000 |
| Biza N. et al.         | 2018 | Semera                                | Afar          | Cross-sectional | Institutional | University/College students   | 509  |
| Abera et al.           | 2012 | Mekelle                               | Tigray        | Cross-sectional | Institutional | Abortion care seekers         | 260  |

\*SNNP: South Nations and Nationalities Peoples

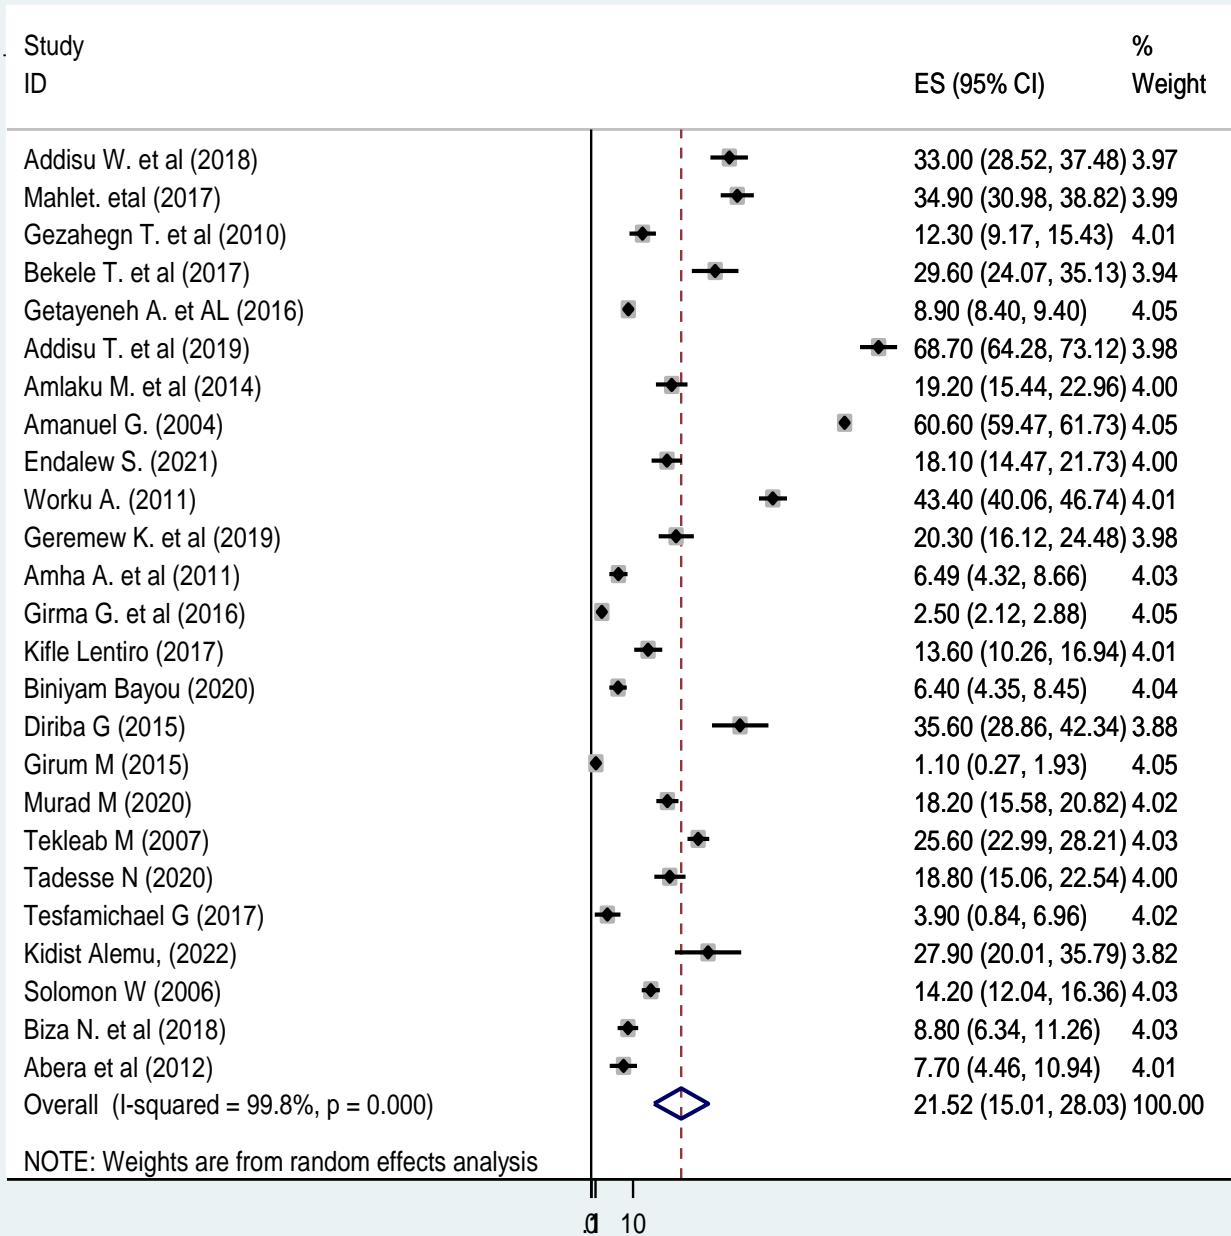

Figure-1: Forest plot of the pooled prevalence of pregnancy termination in Ethiopia, 2023

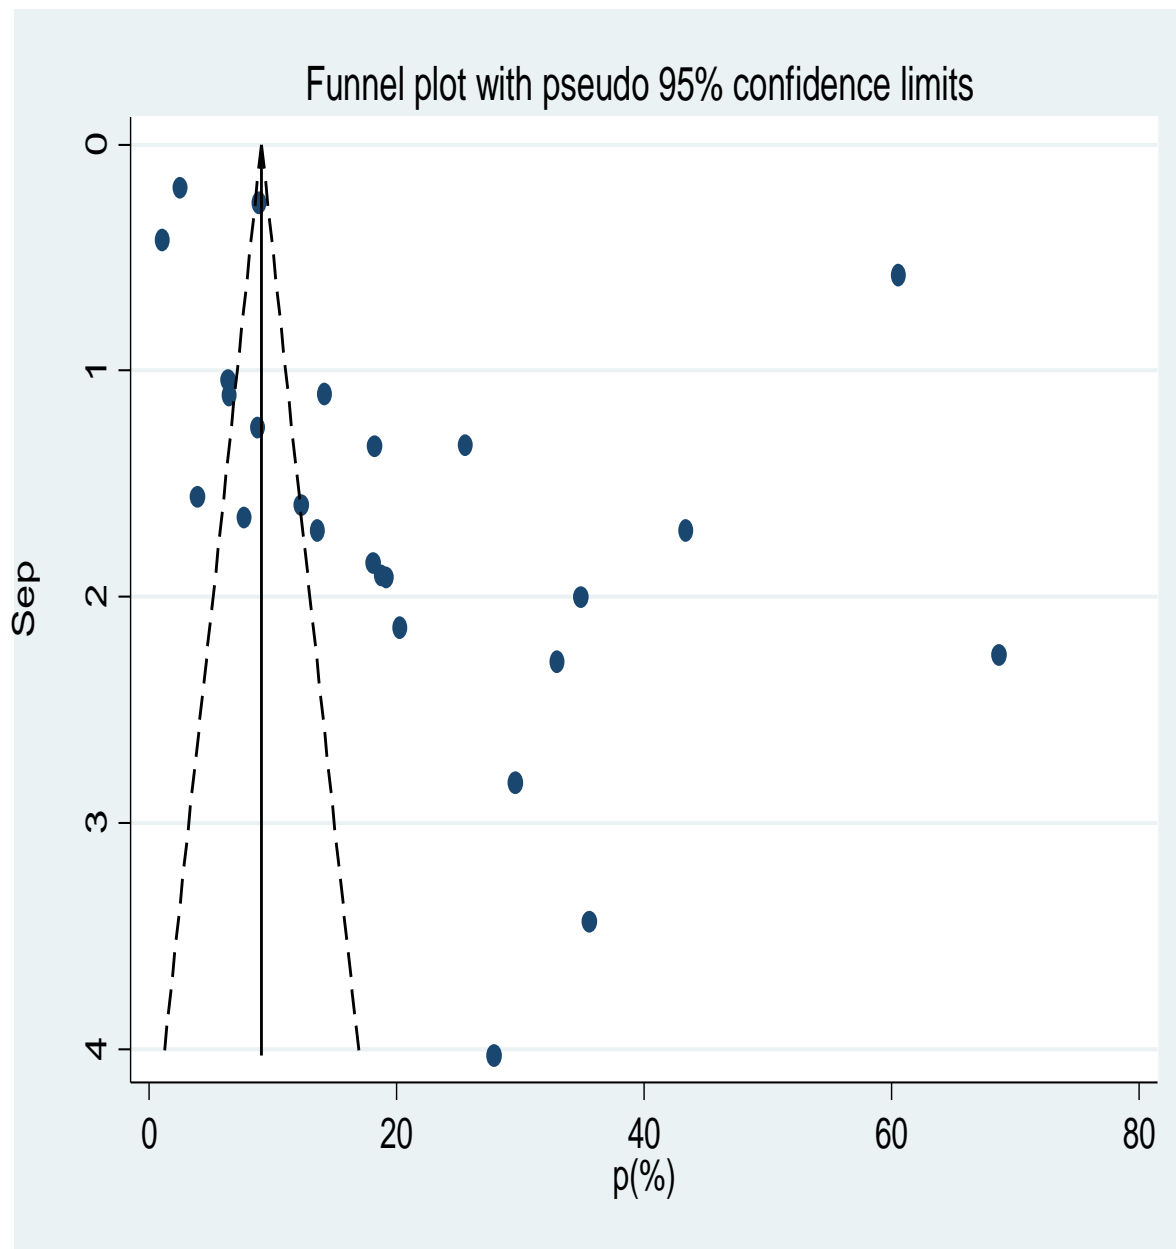

Figure-2: Funnel plot to test publication bias of pregnancy termination in Ethiopia, 2023

1  
2  
3  
4  
5  
6  
7  
8  
9  
10  
11  
12  
13  
14  
15  
16  
17  
18  
19  
20  
21  
22  
23  
24  
25  
26  
27  
28  
29  
30  
31  
32  
33  
34  
35  
36  
37  
38  
39  
40  
41  
42  
43  
44  
45  
46  
47  
48  
49  
50  
51  
52  
53  
54  
55  
56  
57  
58  
59  
60

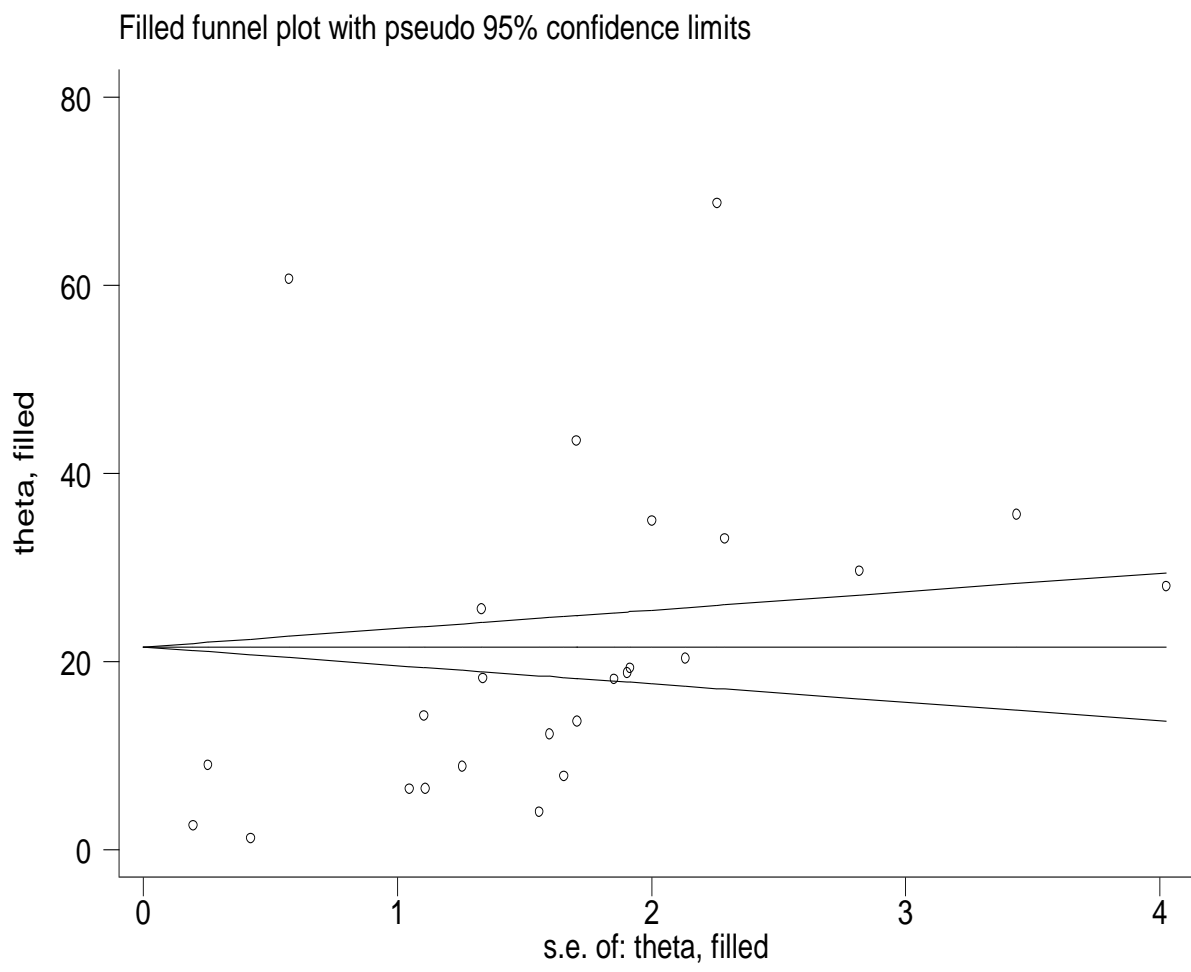

Figure-3: The Duval and Tweedie nonparametric trim and fill analysis of abortion among women in Ethiopia, 2023

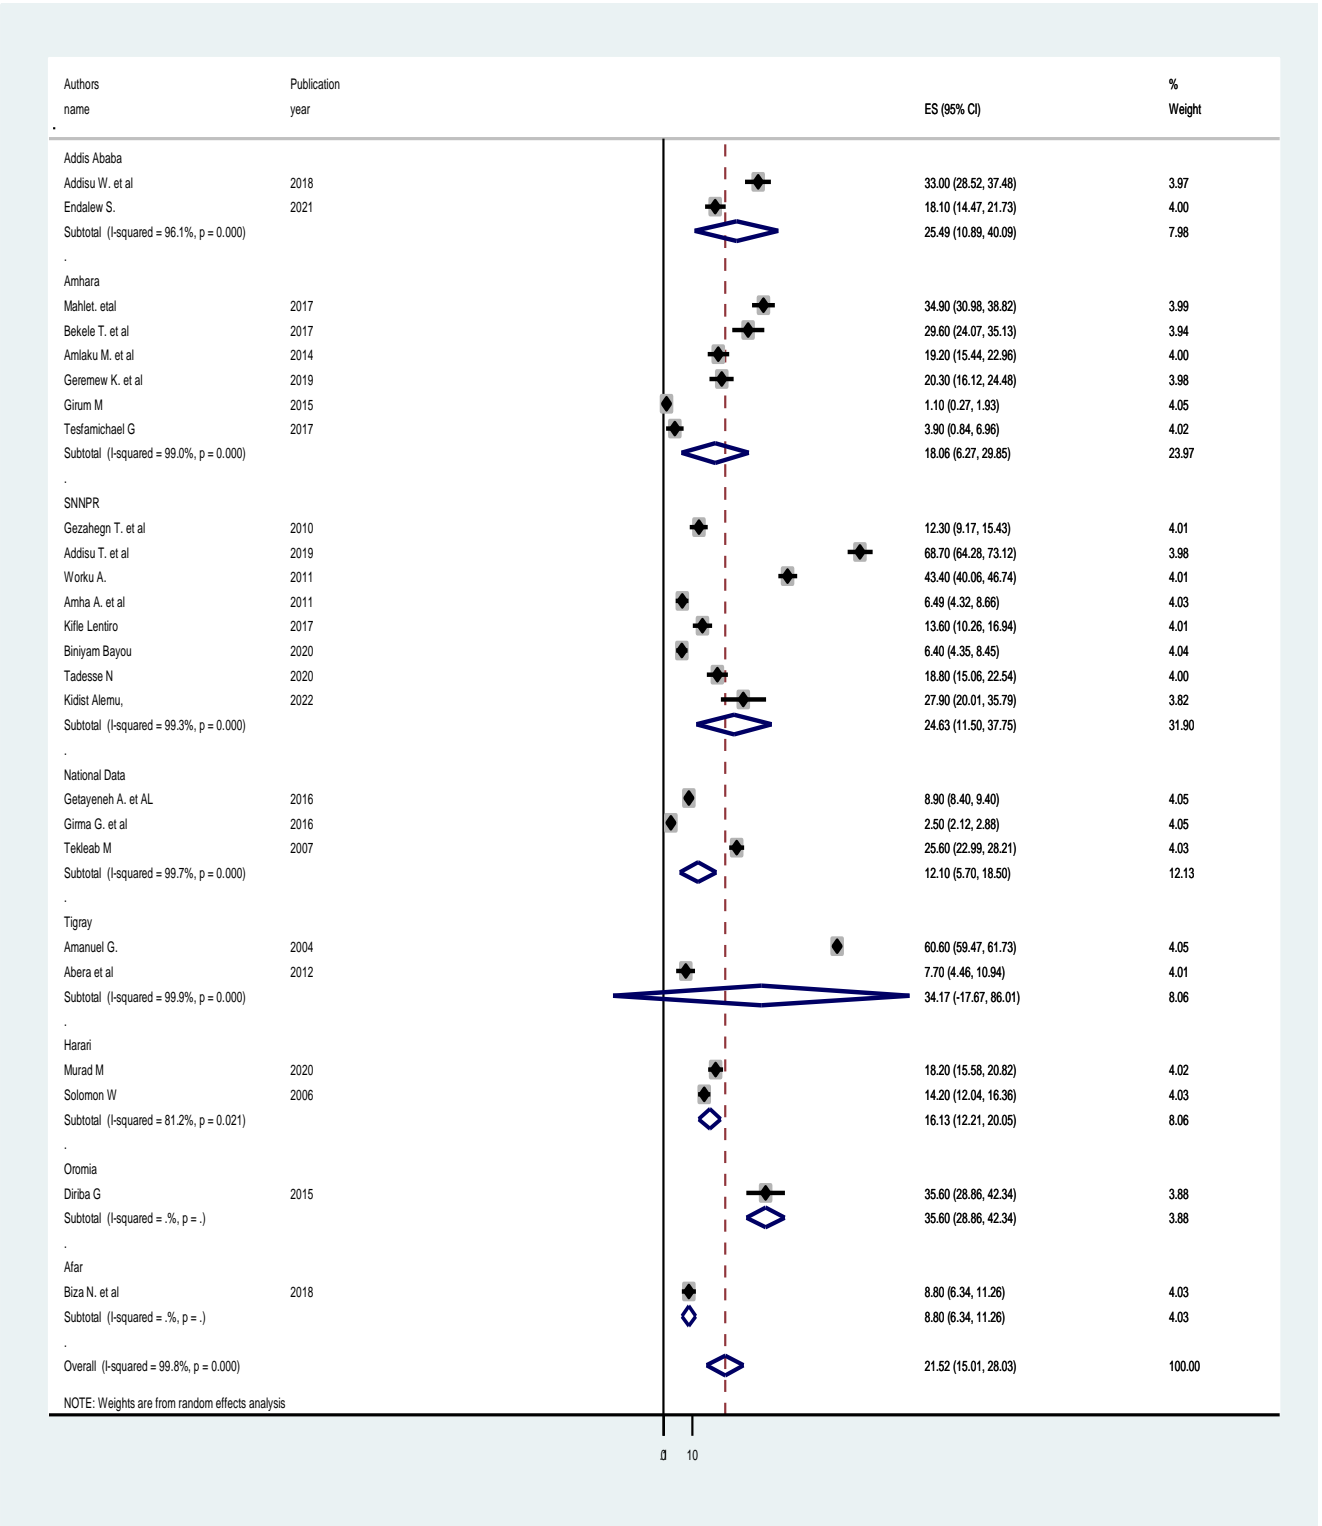

Figure-4: Subgroup analysis of the pregnancy termination based on regional distribution in Ethiopia, 2023

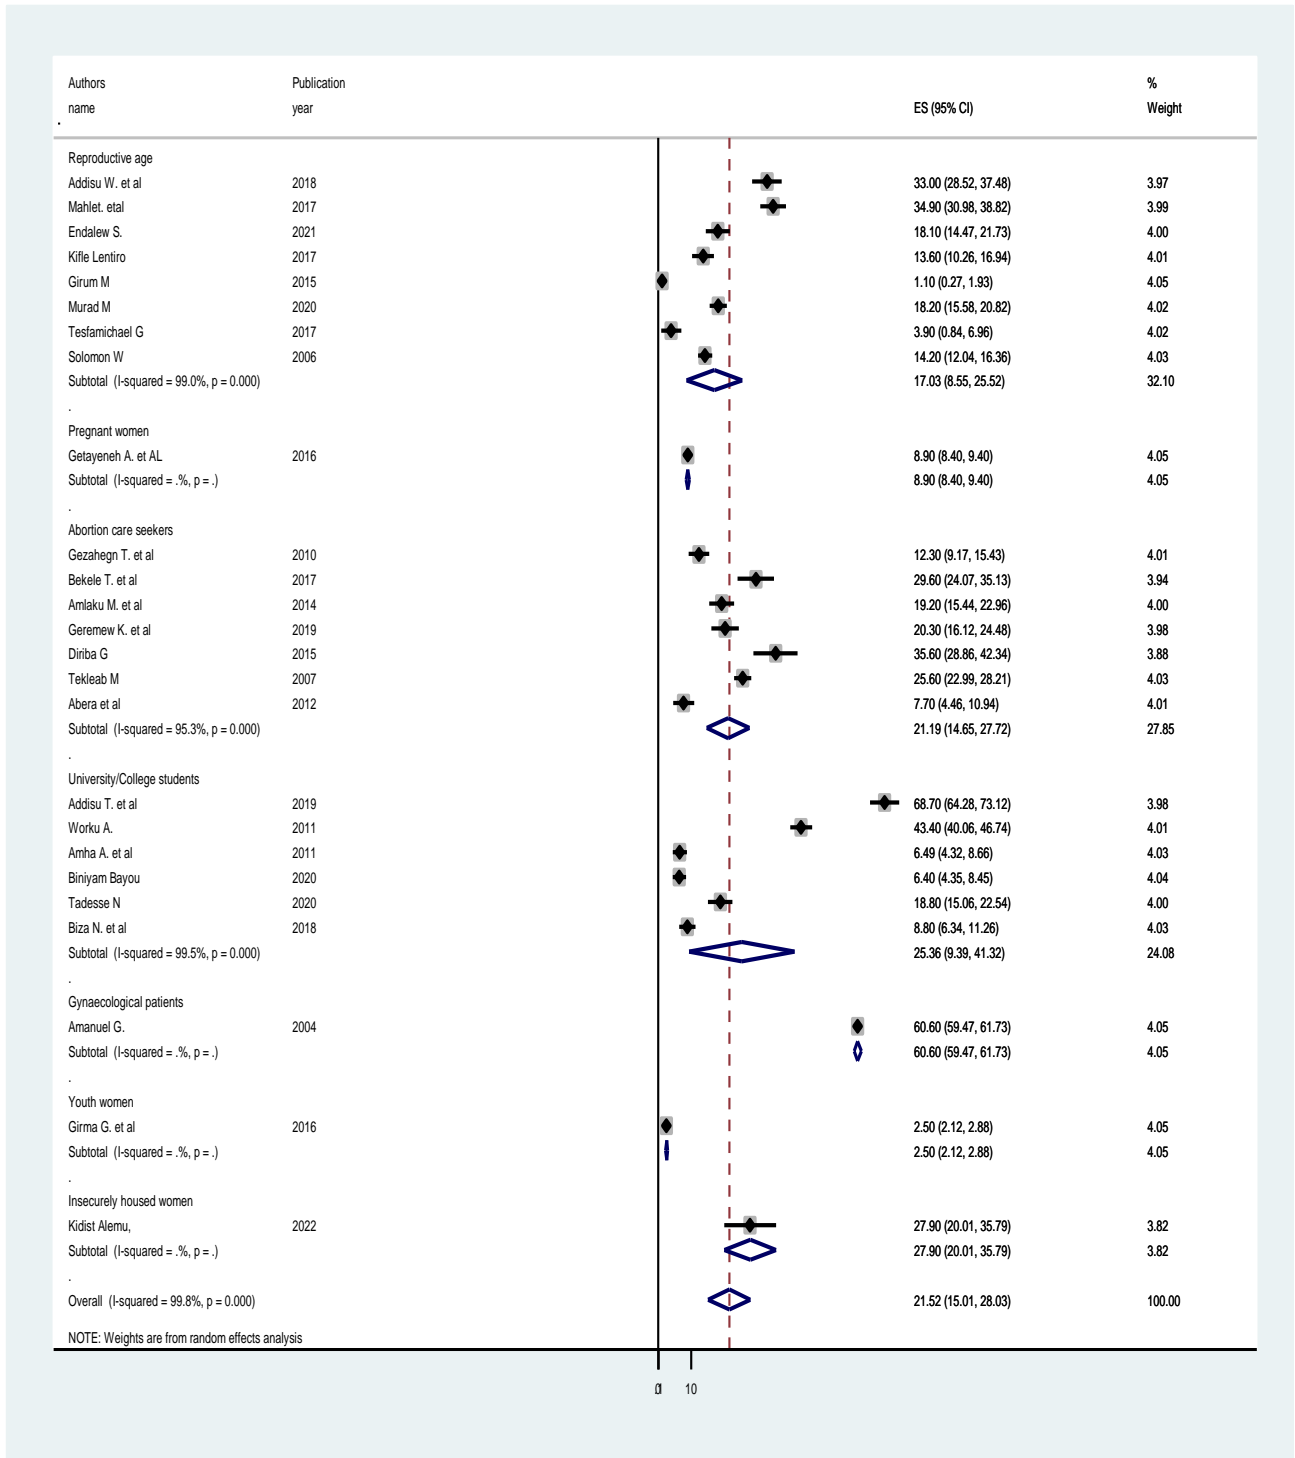

Figure-5: Subgroup analysis of the prevalence of pregnancy termination based on study population in Ethiopia, 2022

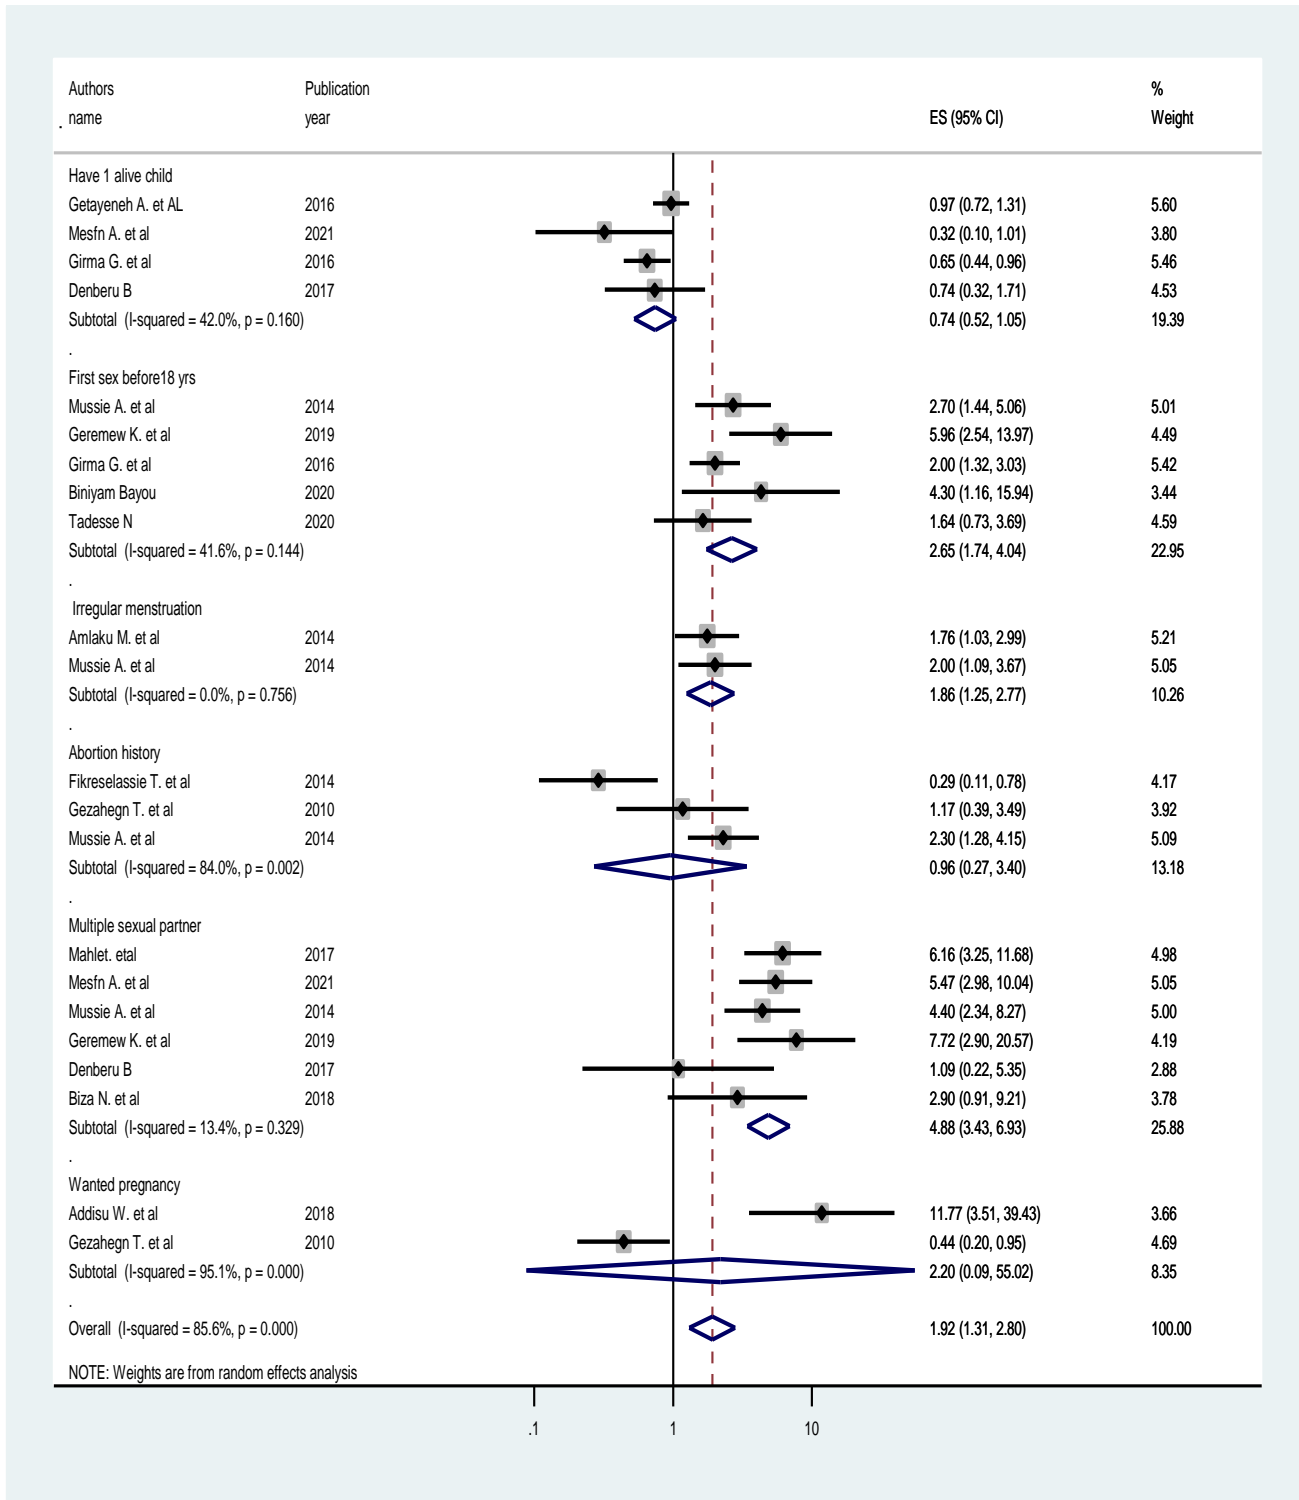

Figure-6: Subgroup analysis of the prevalence of pregnancy termination based on before and after MDG in Ethiopia, 2023

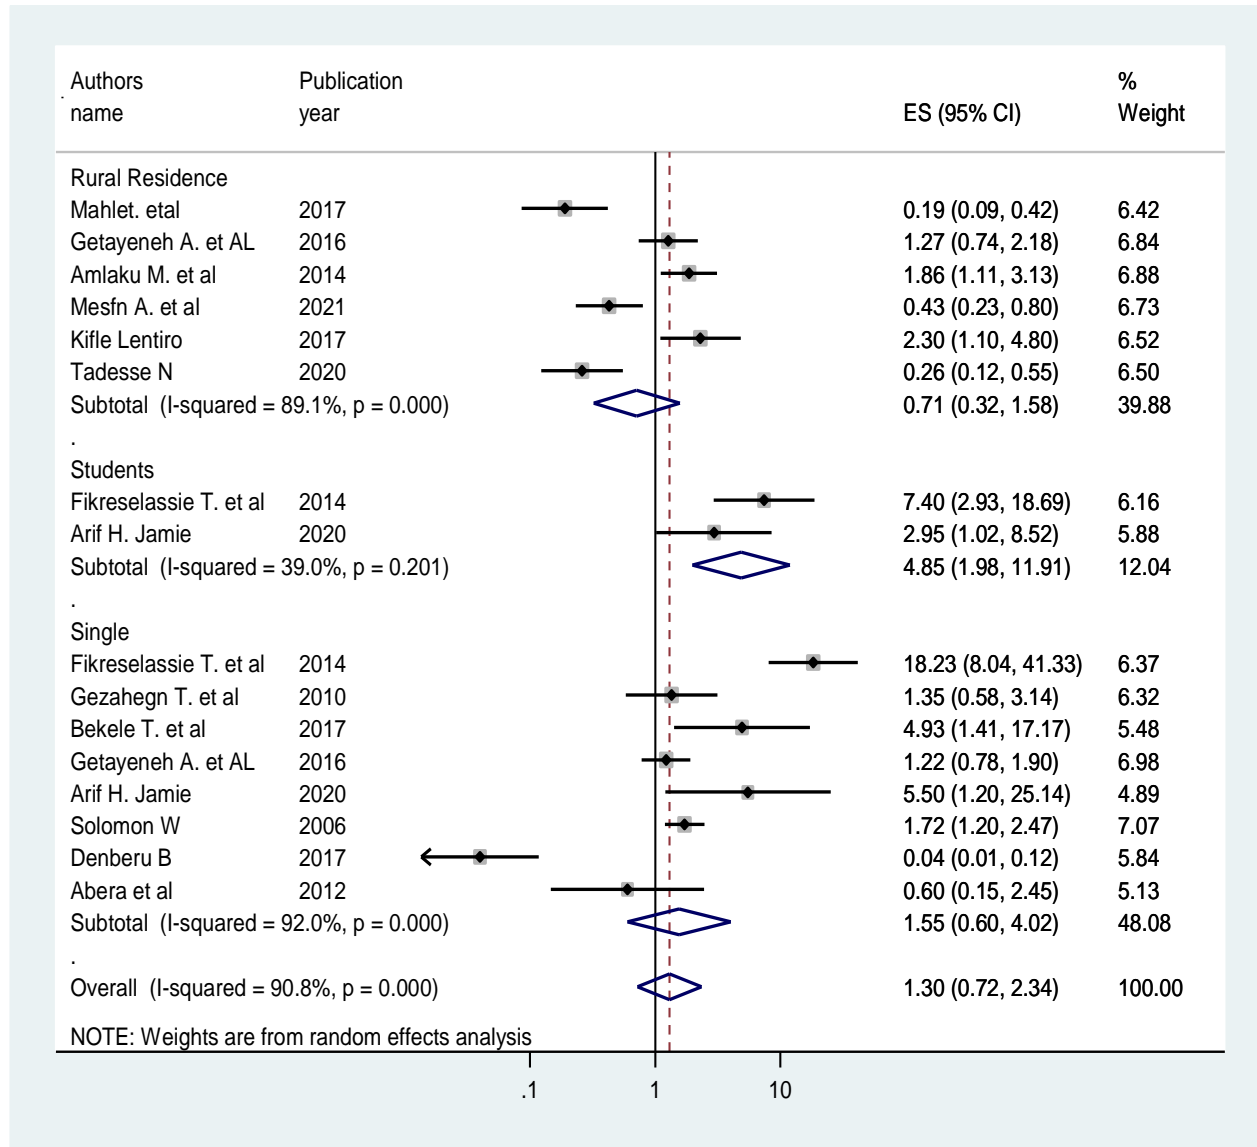

Figure-7: Forest plot of odds ratio for the association of selected socio-demographic characteristics and pregnancy termination in Ethiopia, 2023



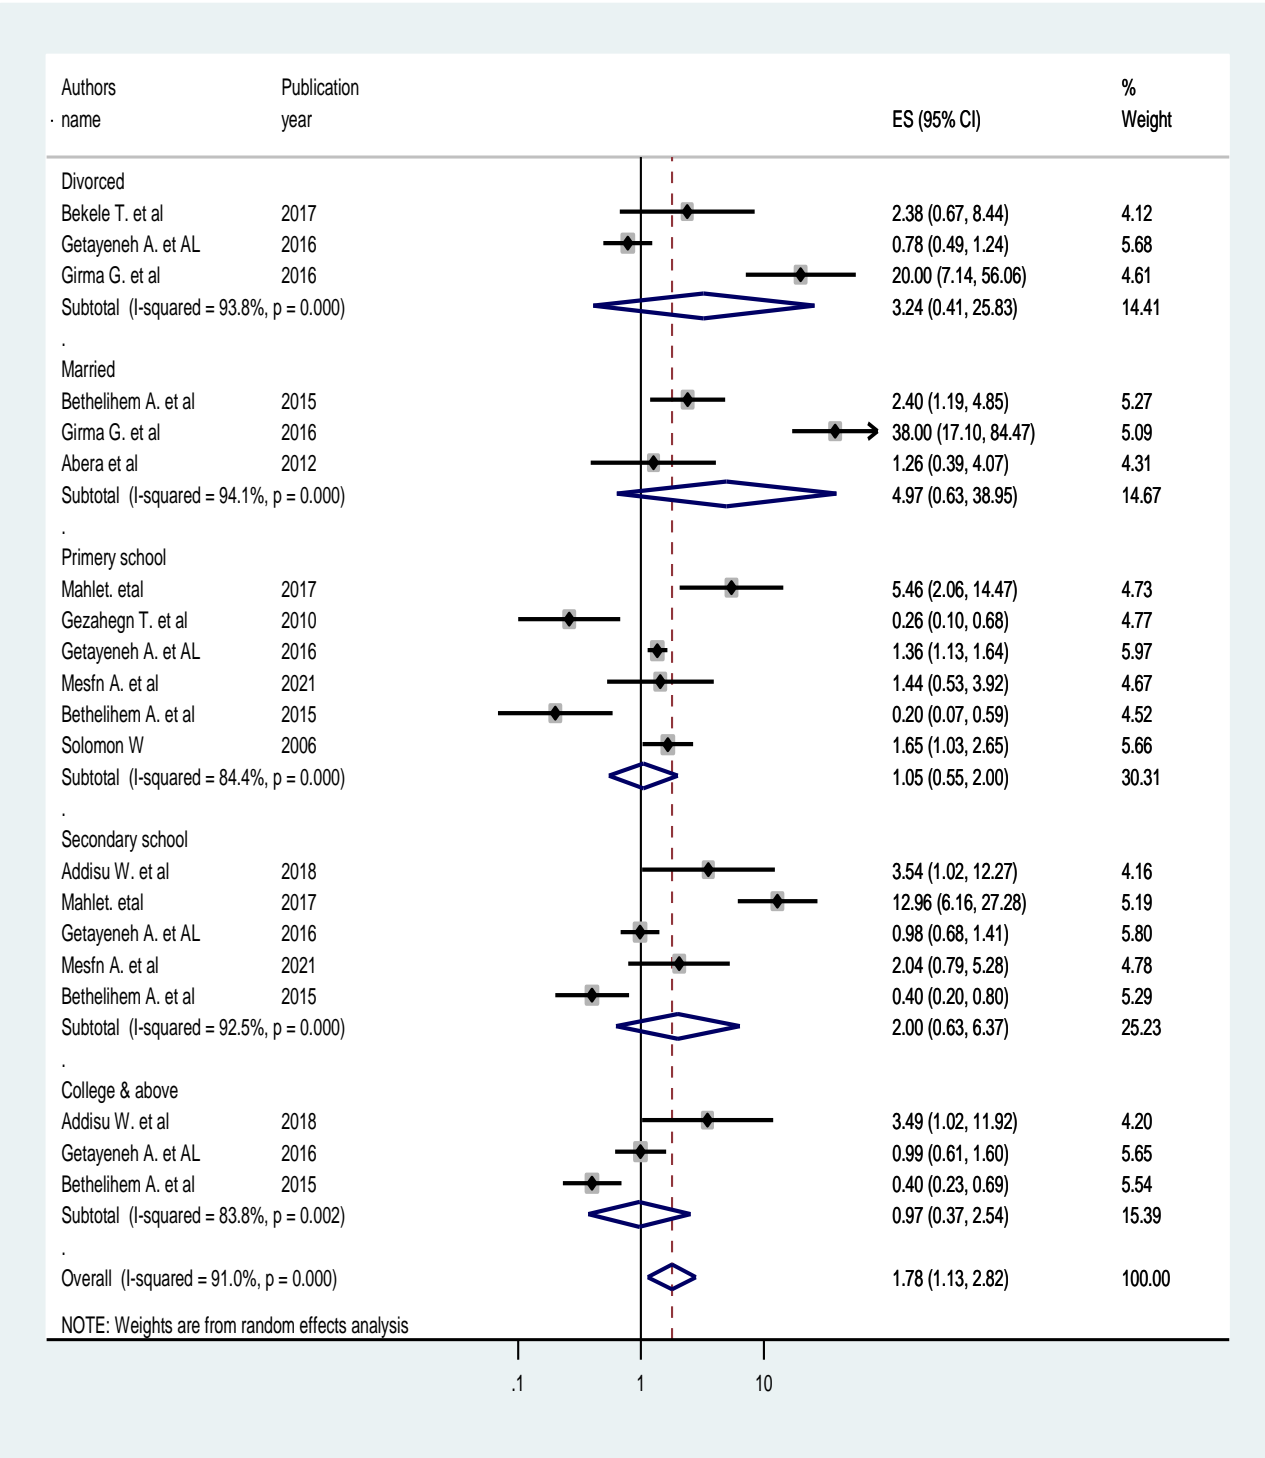

Figure-8: Forest plot of odds ratio for the association of selected socio-demographic characteristics and pregnancy termination in Ethiopia, 2023

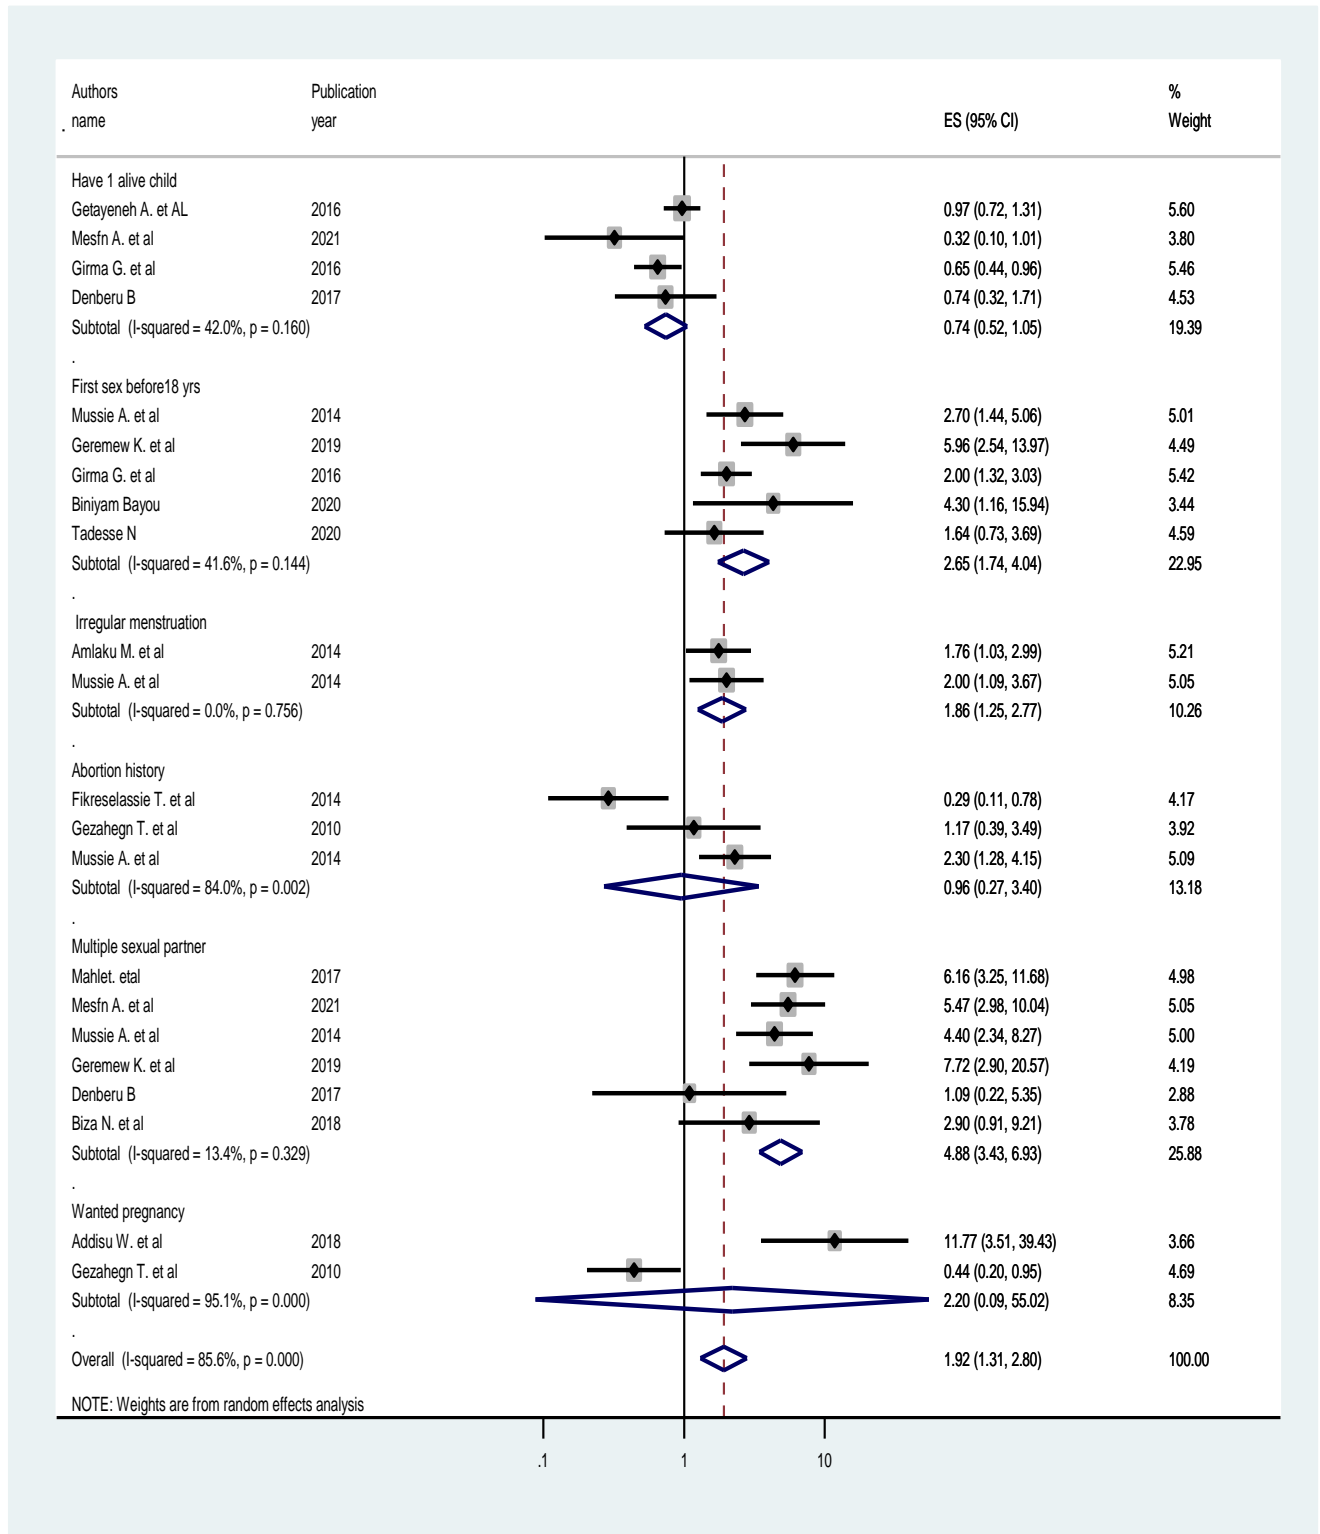

Figure-9: Forest plot of odds ratio for the association of selected reproductive characteristics and pregnancy termination in Ethiopia, 2023

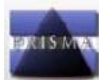

# PRISMA 2020 Checklist

1  
2  
3  
4  
5  
6  
7  
8  
9  
10  
11  
12  
13  
14  
15  
16  
17  
18  
19  
20  
21  
22  
23  
24  
25  
26  
27  
28  
29  
30  
31  
32  
33  
34  
35  
36  
37  
38  
39  
40  
41  
42  
43  
44  
45  
46  
47

| Section and Topic             | Item # | Checklist item                                                                                                                                                                                                                                                                                       | Location where item is reported |
|-------------------------------|--------|------------------------------------------------------------------------------------------------------------------------------------------------------------------------------------------------------------------------------------------------------------------------------------------------------|---------------------------------|
| <b>TITLE</b>                  |        |                                                                                                                                                                                                                                                                                                      |                                 |
| Title                         | 1      | Identify the report as a systematic review.                                                                                                                                                                                                                                                          | 1                               |
| <b>ABSTRACT</b>               |        |                                                                                                                                                                                                                                                                                                      |                                 |
| Abstract                      | 2      | See the PRISMA 2020 for Abstracts checklist.                                                                                                                                                                                                                                                         | 2                               |
| <b>INTRODUCTION</b>           |        |                                                                                                                                                                                                                                                                                                      |                                 |
| Rationale                     | 3      | Describe the rationale for the review in the context of existing knowledge.                                                                                                                                                                                                                          | 3                               |
| Objectives                    | 4      | Provide an explicit statement of the objective(s) or question(s) the review addresses.                                                                                                                                                                                                               | 3                               |
| <b>METHODS</b>                |        |                                                                                                                                                                                                                                                                                                      |                                 |
| Eligibility criteria          | 5      | Specify the inclusion and exclusion criteria for the review and how studies were grouped for the syntheses.                                                                                                                                                                                          | 4-5                             |
| Information sources           | 6      | Specify all databases, registers, websites, organisations, reference lists and other sources searched or consulted to identify studies. Specify the date when each source was last searched or consulted.                                                                                            | 4                               |
| Search strategy               | 7      | Present the full search strategies for all databases, registers and websites, including any filters and limits used.                                                                                                                                                                                 | 4                               |
| Selection process             | 8      | Specify the methods used to decide whether a study met the inclusion criteria of the review, including how many reviewers screened each record and each report retrieved, whether they worked independently, and if applicable, details of automation tools used in the process.                     | 5                               |
| Data collection process       | 9      | Specify the methods used to collect data from reports, including how many reviewers collected data from each report, whether they worked independently, any processes for obtaining or confirming data from study investigators, and if applicable, details of automation tools used in the process. | 5                               |
| Data items                    | 10a    | List and define all outcomes for which data were sought. Specify whether all results that were compatible with each outcome domain in each study were sought (e.g. for all measures, time points, analyses), and if not, the methods used to decide which results to collect.                        | 5                               |
|                               | 10b    | List and define all other variables for which data were sought (e.g. participant and intervention characteristics, funding sources). Describe any assumptions made about any missing or unclear information.                                                                                         | 5                               |
| Study risk of bias assessment | 11     | Specify the methods used to assess risk of bias in the included studies, including details of the tool(s) used, how many reviewers assessed each study and whether they worked independently, and if applicable, details of automation tools used in the process.                                    | 6                               |
| Effect measures               | 12     | Specify for each outcome the effect measure(s) (e.g. risk ratio, mean difference) used in the synthesis or presentation of results.                                                                                                                                                                  | 6                               |
| Synthesis methods             | 13a    | Describe the processes used to decide which studies were eligible for each synthesis (e.g. tabulating the study intervention characteristics and comparing against the planned groups for each synthesis (item #5)).                                                                                 | 6                               |
|                               | 13b    | Describe any methods required to prepare the data for presentation or synthesis, such as handling of missing summary statistics, or data conversions.                                                                                                                                                | 6                               |
|                               | 13c    | Describe any methods used to tabulate or visually display results of individual studies and syntheses.                                                                                                                                                                                               | 6                               |
|                               | 13d    | Describe any methods used to synthesize results and provide a rationale for the choice(s). If meta-analysis was performed, describe the model(s), method(s) to identify the presence and extent of statistical heterogeneity, and software package(s) used.                                          | 6                               |
|                               | 13e    | Describe any methods used to explore possible causes of heterogeneity among study results (e.g. subgroup analysis, meta-regression).                                                                                                                                                                 | 6                               |
|                               | 13f    | Describe any sensitivity analyses conducted to assess robustness of the synthesized results.                                                                                                                                                                                                         | 6                               |
| Reporting bias assessment     | 14     | Describe any methods used to assess risk of bias due to missing results in a synthesis (arising from reporting biases).                                                                                                                                                                              | 6                               |
| Certainty                     | 15     | Describe any methods used to assess certainty (or confidence) in the body of evidence for an outcome.                                                                                                                                                                                                | 6                               |

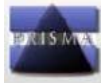

## PRISMA 2020 Checklist

| Section and Topic                              | Item # | Checklist item                                                                                                                                                                                                                                                                       | Location where item is reported |
|------------------------------------------------|--------|--------------------------------------------------------------------------------------------------------------------------------------------------------------------------------------------------------------------------------------------------------------------------------------|---------------------------------|
| assessment                                     |        |                                                                                                                                                                                                                                                                                      |                                 |
| <b>RESULTS</b>                                 |        |                                                                                                                                                                                                                                                                                      |                                 |
| Study selection                                | 16a    | Describe the results of the search and selection process, from the number of records identified in the search to the number of studies included in the review, ideally using a flow diagram.                                                                                         | 7                               |
|                                                | 16b    | Cite studies that might appear to meet the inclusion criteria, but which were excluded, and explain why they were excluded.                                                                                                                                                          | 7                               |
| Study characteristics                          | 17     | Cite each included study and present its characteristics.                                                                                                                                                                                                                            | 7                               |
| Risk of bias in studies                        | 18     | Present assessments of risk of bias for each included study.                                                                                                                                                                                                                         | 7                               |
| Results of individual studies                  | 19     | For all outcomes, present, for each study: (a) summary statistics for each group (where appropriate) and (b) an effect estimate and its precision (e.g. confidence/credible interval), ideally using structured tables or plots.                                                     | 7-9                             |
| Results of syntheses                           | 20a    | For each synthesis, briefly summarise the characteristics and risk of bias among contributing studies.                                                                                                                                                                               | 7-9 & 14                        |
|                                                | 20b    | Present results of all statistical syntheses conducted. If meta-analysis was done, present for each the summary estimate and its precision (e.g. confidence/credible interval) and measures of statistical heterogeneity. If comparing groups, describe the direction of the effect. | 7-9 & 14                        |
|                                                | 20c    | Present results of all investigations of possible causes of heterogeneity among study results.                                                                                                                                                                                       | 7-9 & 14                        |
|                                                | 20d    | Present results of all sensitivity analyses conducted to assess the robustness of the synthesized results.                                                                                                                                                                           | 7-9 & 14                        |
| Reporting biases                               | 21     | Present assessments of risk of bias due to missing results (arising from reporting biases) for each synthesis assessed.                                                                                                                                                              | 7-9                             |
| Certainty of evidence                          | 22     | Present assessments of certainty (or confidence) in the body of evidence for each outcome assessed.                                                                                                                                                                                  | 7-9                             |
| <b>DISCUSSION</b>                              |        |                                                                                                                                                                                                                                                                                      |                                 |
| Discussion                                     | 23a    | Provide a general interpretation of the results in the context of other evidence.                                                                                                                                                                                                    | 11-13                           |
|                                                | 23b    | Discuss any limitations of the evidence included in the review.                                                                                                                                                                                                                      | 11-13                           |
|                                                | 23c    | Discuss any limitations of the review processes used.                                                                                                                                                                                                                                | 13                              |
|                                                | 23d    | Discuss implications of the results for practice, policy, and future research.                                                                                                                                                                                                       | 111-13                          |
| <b>OTHER INFORMATION</b>                       |        |                                                                                                                                                                                                                                                                                      |                                 |
| Registration and protocol                      | 24a    | Provide registration information for the review, including register name and registration number, or state that the review was not registered.                                                                                                                                       | 5                               |
|                                                | 24b    | Indicate where the review protocol can be accessed, or state that a protocol was not prepared.                                                                                                                                                                                       | 5                               |
|                                                | 24c    | Describe and explain any amendments to information provided at registration or in the protocol.                                                                                                                                                                                      | 5                               |
| Support                                        | 25     | Describe sources of financial or non-financial support for the review, and the role of the funders or sponsors in the review.                                                                                                                                                        | 14                              |
| Competing interests                            | 26     | Declare any competing interests of review authors.                                                                                                                                                                                                                                   | 14                              |
| Availability of data, code and other materials | 27     | Report which of the following are publicly available and where they can be found: template data collection forms; data extracted from included studies; data used for all analyses; analytic code; any other materials used in the review.                                           | 14                              |

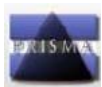

## PRISMA 2020 Checklist

- 1
- 2
- 3
- 4
- 5
- 6
- 7
- 8
- 9
- 10
- 11
- 12
- 13
- 14
- 15
- 16
- 17
- 18
- 19
- 20
- 21
- 22
- 23
- 24
- 25
- 26
- 27
- 28
- 29
- 30
- 31
- 32
- 33
- 34
- 35
- 36
- 37
- 38
- 39
- 40
- 41
- 42
- 43
- 44
- 45
- 46
- 47

10.1136/bmj.n71

For more information, visit: <http://www.prisma-statement.org/>

For peer review only

# BMJ Open

## Prevalence and determinants of pregnancy termination in Ethiopia: A systematic review and meta-analysis

|                                 |                                                                                                                                                                                                                                                  |
|---------------------------------|--------------------------------------------------------------------------------------------------------------------------------------------------------------------------------------------------------------------------------------------------|
| Journal:                        | <i>BMJ Open</i>                                                                                                                                                                                                                                  |
| Manuscript ID                   | bmjopen-2023-073799.R2                                                                                                                                                                                                                           |
| Article Type:                   | Original research                                                                                                                                                                                                                                |
| Date Submitted by the Author:   | 08-Dec-2023                                                                                                                                                                                                                                      |
| Complete List of Authors:       | Kumsa, Henok; Woldia University<br>Misl, Esuyawkal; Woldia University, Midwifery<br>Arage, Mulugeta; Woldia University, Midwifery<br>Kidie, Atitegeb; Woldia University<br>Hailu, Tilahun; Woldia University<br>tenaw, lebeza; Woldia University |
| <b>Primary Subject Heading</b>: | Obstetrics and gynaecology                                                                                                                                                                                                                       |
| Secondary Subject Heading:      | Sexual health, Reproductive medicine, Public health                                                                                                                                                                                              |
| Keywords:                       | Adolescent, Public health < INFECTIOUS DISEASES, Sexual and Gender Minorities                                                                                                                                                                    |
|                                 |                                                                                                                                                                                                                                                  |

SCHOLARONE™  
Manuscripts



I, the Submitting Author has the right to grant and does grant on behalf of all authors of the Work (as defined in the below author licence), an exclusive licence and/or a non-exclusive licence for contributions from authors who are: i) UK Crown employees; ii) where BMJ has agreed a CC-BY licence shall apply, and/or iii) in accordance with the terms applicable for US Federal Government officers or employees acting as part of their official duties; on a worldwide, perpetual, irrevocable, royalty-free basis to BMJ Publishing Group Ltd ("BMJ") its licensees and where the relevant Journal is co-owned by BMJ to the co-owners of the Journal, to publish the Work in this journal and any other BMJ products and to exploit all rights, as set out in our [licence](#).

The Submitting Author accepts and understands that any supply made under these terms is made by BMJ to the Submitting Author unless you are acting as an employee on behalf of your employer or a postgraduate student of an affiliated institution which is paying any applicable article publishing charge ("APC") for Open Access articles. Where the Submitting Author wishes to make the Work available on an Open Access basis (and intends to pay the relevant APC), the terms of reuse of such Open Access shall be governed by a Creative Commons licence – details of these licences and which [Creative Commons](#) licence will apply to this Work are set out in our licence referred to above.

Other than as permitted in any relevant BMJ Author's Self Archiving Policies, I confirm this Work has not been accepted for publication elsewhere, is not being considered for publication elsewhere and does not duplicate material already published. I confirm all authors consent to publication of this Work and authorise the granting of this licence.

1  
2  
3 **Prevalence and determinants of pregnancy termination in Ethiopia: A systematic review**  
4 **and meta-analysis**  
5

6  
7 Henok Kumsa<sup>1</sup>, Esuyawkal Mislu<sup>1</sup>, Mulugeta Wodaje Arage<sup>1</sup>, Atitegeb Abera<sup>2</sup>, Tilahun Hailu<sup>2</sup>,  
8 and Lebeza Alemu Tenaw<sup>2</sup>  
9

10  
11  
12 *Affiliations* invaluable  
13

14 <sup>1</sup>School of Midwifery, College of Health Science, Woldia University, Ethiopia  
15

16  
17 <sup>2</sup> School of Public health, College of Health Science, Woldia University, Ethiopia  
18

19 Email Address  
20

21 HK: [henokkumsa@gmail.com](mailto:henokkumsa@gmail.com)  
22

23 EM: [esuyawkalmislu@gmail.com](mailto:esuyawkalmislu@gmail.com)  
24

25 MWA: [mulewodaje@gmail.com](mailto:mulewodaje@gmail.com)  
26

27 AA: [atitegebabera@gmail.com](mailto:atitegebabera@gmail.com)  
28

29 TH: [lemaryam01@gmail.com](mailto:lemaryam01@gmail.com)  
30

31 LAT: [lebezaa@gmail.com](mailto:lebezaa@gmail.com)  
32

33 \*Corresponding author: Lebeza Alemu Tenaw  
34

35 Email: [lebezaa@gmail.com](mailto:lebezaa@gmail.com)  
36  
37  
38  
39  
40  
41  
42  
43  
44  
45  
46  
47  
48  
49  
50  
51  
52  
53  
54  
55  
56  
57  
58  
59  
60



## Abstract

**Objective:** This review aims to determine the prevalence of pregnancy termination and its determinant factors in Ethiopia.

**Design:** Systematic review and meta-analysis

**Data sources:** Relevant articles were retrieved from databases such as PubMed, EMBASE, Medline, and other search engines.

**Eligibility criteria for selecting studies:** The research design for this study had no restrictions, allowing for the inclusion of cross-sectional and case-control studies that examined the prevalence or determinants of pregnancy termination. However, case reports, case series, reviews, editorials, and studies published as abstracts only were excluded from the analysis.

**Data extraction and synthesis:** The review precisely in accordance with PRISMA criteria, and the quality of the review was assessed using the Joanna Briggs Institute critical appraisal checklist. Heterogeneity was indicated by the p-value for  $I^2$  statistics less than 0.05. Data were entered into Microsoft Excel, and the analysis was conducted using Stata 16.

**Results:** The pooled prevalence pregnancy termination in Ethiopia was 21.52% (95% CI: 15.01, 28.03). Women who had their first sexual initiation before the age of 18 (OR = 1.78; 95% CI = 1.13, 2.82, P=0.144), had irregular menstrual bleeding (OR = 1.86; 95% CI = 1.25, 2.77, P=0.756), being a student (OR: 4.85; 95% CI: 1.98, 11.91, P=0.201), and had multiple sexual partners (OR: 4.88; 95% CI: 3.43, 6.93, P=0.329) were significantly associated with pregnancy termination.

**Conclusions:** One in five women terminated their pregnancies, which is higher than in other sub-Saharan countries. Being a student, irregular menstrual bleeding, early initiation of sexual intercourse, and multiple sexual partners were determinants of pregnancy termination. Special attention is needed in avoiding early sexual initiation and in reducing sexual risk behaviors.

**Keywords:** Pregnancy termination, Determinantss, Systematic review and meta analysis, Ethiopia

## Introduction

Pregnancy termination is a sensitive and contentious issue with religious, moral, cultural, and political dimensions. Also, it presents a significant public health concern in developing countries (1). Above 60% of unintended pregnancies result in pregnancy termination, with the majority of those being unsafe (2). Developing countries bear the burden of 97% of all unsafe abortions which contributes to 220 deaths per 100,000 live births (3).

Moreover, pregnancy termination imposes an additional burden on health institutions and individuals; in developing countries alone, each year an estimated 7 million women seek treatment in health facilities for the complication of pregnancy termination (4). It is estimated that health-care systems will spend \$553 million per year on post-abortion complications and will lose \$922 million in income due to long-term disability caused by unsafe termination (5). Additionally, a woman who undergo pregnancy termination, particularly through methods such as mechanical dilation and curettage, face an increased a risk of experiencing preterm birth and repeated pregnancy loss (6).

Though the burden of pregnancy termination in Ethiopia is a significant contributor to maternal mortality and morbidity (7). Previous studies conducted in Ethiopia have shown that the prevalence of pregnancy termination and its negative consequences are increasing over time (8, 9), and repeated pregnancy termination also accounts significant amount (10-12). Several variables, including early age marriage, low level of education, early sexual intercourse initiation, violence/rape, emotional well-being, educational status, employment status, and resources, and sexual intercourse relationship, have been implicated as factors of pregnancy termination in studies conducted across Ethiopia (13-16).

However, at the national level, illustrative evidence is lacking in Ethiopia regarding the level and underlying factors of pregnancy termination. Thus, this systematic review and meta-analysis aimed to assess the prevalence of pregnancy termination and its determinant factors in Ethiopia. The findings of this study provide evidence for intervention to reduce the burden of pregnancy termination, its complications, and its economic impact in the country. Additionally, this study will help to design strategies and monitor the progress of programs aimed at achieving the maternal mortality reduction targets of the sustainable development goals.

## Methods

### Study design and setting

This systematic review and meta-analysis included cross sectional, and case control studies which has been conducted in Ethiopia. Systematic review and meta-analysis using computerized databases; searches were performed to estimate the prevalence and identify the determinants of pregnancy termination in Ethiopia.

### Search strategy

For this review, a comprehensive search was conducted using various searching strategies to identify relevant articles. Published articles were searched in well-known online databases including EMBASE, Medline, Google, PubMed, Google Scholar, African Journal Online, and Science Direct databases. Additionally, the search was expanded by examining the reference lists of eligible articles to retrieve and extract potential articles. This systematic review was conducted using the preferred reporting items for systematic Reviews and Meta-Analyses PRISMA guidelines. Similarly, the quality of our systematic review and meta-analysis was assessed using the Joanna Briggs Institute (JBI) critical appraisal checklist (17).

Searching was done by using Medical Subject Heading (MeSH) terms related with determinants of pregnancy termination. MeSH terms enables us to select related research articles. We conducted the search for terms using Boolean operators "AND" and "OR," both separately and in combinations. We used the search terms “(((((((Abortion) OR (termination of pregnancy)) OR (miscarriage)) AND (determinant factors)) OR (determinants)) OR (associated factors)) OR (influencing factors)) AND (Amhara) OR (Oromia) OR (Tigray) OR (Southern nation, nationalities and people’s) OR (Afar) OR (Benshagul gumuz) OR (Gamabella) OR (Somali) OR (Dire dawa) OR (Addis Ababa) OR (Hareri) OR (Ethiopia)”.

### Eligibility criteria

### Inclusion criteria

There were no restrictions on research design. We included cross-sectional and case-control studies that showed the prevalence of or determinants of pregnancy termination. Additionally,

1  
2  
3 Only articles reported in the English language and conducted studies until February 2023 were  
4 included.  
5

### 6 7 **Exclusion criteria** 8

9  
10 Case reports, case series, reviews, editorials, and studies published as abstracts only were  
11 excluded. Agreements on the inclusion and exclusion of the articles were held through the  
12 participation of all authors.  
13  
14

### 15 16 **Quality assessment and data extraction** 17

18  
19 Articles were screened using their titles, abstracts, and full paper reviews before being included  
20 in the meta-analysis. The quality of included studies was evaluated using the Joanna Briggs  
21 Institute (JBI) critical appraisal checklist (17). The quality scores of included studies were  
22 assessed and presented using the mean scores to designate them as high- or low-quality. The JBI  
23 tool for prevalence and determinat studies was used as a guideline for data extraction from the  
24 final selected articles. The extraction sheet contains name of authors, study year, publication  
25 year, region of study, study design, sample size, prevalence in percentage or proportion, odd  
26 ratio of factors, confidence intervals both the upper and lower bound of each corresponding odds  
27 ratio. The odd ratio of each factors are transformed as log (OR). The lower and upper  
28 confidence intervals are log transformed as log (upper confidence interval), and log (lower  
29 confidence interval). The standard error for the proportion was also created as: Standard error =  
30  $\sqrt{\frac{p(1-p)}{n}}$ . And then the standard error of the confidence intervals were also estimated using the  
31 log transformed upper and lower limits which is calculated as  $SE = (\log UCL - \log LCL) / 3.92$ .  
32 Finally for pooled prevalence estimation, the proportion and its corresponding standard errors  
33 were used. For factors, the log transformed odd ratios and the standard error of their  
34 corresponding confidence intervals were used to estimate the effect sizes. Moreover, all authors  
35 independently reviewed the titles and abstracts of studies to be included in this systematic review  
36 and meta-analysis. Agreements on the inclusion and exclusion of the articles were reached with  
37 the participation of all authors.  
38  
39  
40  
41  
42  
43  
44  
45  
46  
47  
48  
49  
50  
51  
52  
53  
54  
55  
56  
57  
58  
59  
60

### Measurement of the outcome variable

In this study, termination of pregnancy is the removal of pregnancy tissue, conception products, or fetus, and placenta from the uterus. The term 'fetus' and 'placenta' is commonly used after eight weeks of pregnancy. Pregnancy tissue and products of conception are the tissues that are produced by the union of an egg and sperm before eight weeks. Terminating a pregnancy is a deliberate action taken by a health professional or the woman herself (18).

### Registration and protocol

This review has not previously registered or prepared a protocol. As a result, no adjustments have been made.

**Patient and Public Involvement:** not applicable

### Statistical methods and analysis

The meta-analysis was conducted using Stata 16 software after entering data into Microsoft Excel. Forest plots were used to demonstrate the prevalence of pregnancy termination in Ethiopia. The random effect model of analysis was utilized as a method of meta-analysis to minimize the heterogeneity of included studies (19). The study setting, population, and study period were used to conduct sub-group analysis. The presentation of pregnancy termination determinants was based on odds ratios (ORs) with a 95% confidence interval(CI).

The heterogeneity of the studies included was assessed using the  $I^2$  statistics. The presence of heterogeneity was determined by using a p-value for  $I^2$  statistics that was less than 0.05. Based on the  $I^2$  test statistics results, the heterogeneity is categorized as low (25%), moderate (50%), and high (75%) (19). Furthermore, the Egger regression asymmetry test was used to evaluate the publication bias (20, 21). When the Egger test result's P-value is less than 0.05, there is a declaration of publication bias. The Duval and Tweedie nonparametric trim and fill analysis using the random effect analysis was conducted to detect the presence of publication bias (22).

## Result

### Study selection

This systematic review and meta-analysis included published studies on the termination of pregnancy in Ethiopia. A total of 12,242 records were retrieved through electronic database searching, and only 33 articles were included in the final analysis (supplementary figure 1).

### Characteristics of included studies

This review included Thirty-three studies conducted in various regions of Ethiopia. Of all the studies, 8 (24.24%) were from the Amhara Region (11, 12, 15, 16, 23-26), South Nations and Nationalities Peoples accounted for 9 (27.27%) of the total (13, 27-34), 1 was from Oromia (35), 5 (15.15%) from Addis Ababa city administration (10, 14, 36-38), 3 (9.09%) were from Harari region (39-41), 3 (9.09%) were from Tigray region (42-44), 1 (3.03%) was from Afar region (45), 3 (9.09) were from National data (46-48). Twenty-eight (84.85%) of the included articles were cross-sectional studies (10-13, 15, 23-31, 33-35, 37-42, 44-48), and remains five (15.15%) were case-control studies(14, 16, 32, 36, 43).

As well, twenty-seven of the studies were institution-based (10-16, 24, 27-33, 35-46), while six were community-based studies(23, 25, 26, 34, 47, 48). The sample size of the included studies ranged from a minimum of 124 in a study conducted in southwest Ethiopia (34) and to a maximum of 12,378 in a study conducted using DHS data (48). Overall, a total of 40,116 study participants were included in this review detail is available in supplementary table 1.

### Prevalence of pregnancy termination in Ethiopia

Based on the random effect model, the overall pooled prevalence of termination of pregnancy among women in Ethiopia was 21.52% (95% CI: 15.01–28.03) (supplementary figure 2). The meta-analysis included studies with significant heterogeneity:  $I^2$  value of 99.8%,  $p < 0.000$ . Publication biases among the included studies were examined using funnel plots and Egger's regression test. The results of funnel plots showed an asymmetric shape, which indicates the presence of publication bias among those included studies. Additionally, the Duval and Tweedie nonparametric trim and fill analysis was applied to correct publication bias among the studies, but no trimming was performed since the data is unchanged (supplementary figures 3 and 4).

1  
2  
3  
4  
5  
6 Objective assessments of publication bias by Egger's regression test also showed the presence of  
7 publication bias across studies ( $p$ -value < 0.001). After conducting the trim and fill analysis to  
8 address publication bias, the final pooled prevalence of pregnancy termination in Ethiopia was  
9 adjusted to 21.52% (95% CI: 15.01–28.03).  
10  
11

### 12 **Subgroup analysis**

13  
14  
15 We performed subgroup analysis based on the region, study population, and study setting of the  
16 included studies. Table 1 shows the pooled prevalence was highest, 35.60% (95% CI: 28.86,  
17 42.34) in the Oromia region, followed by 34.17% (95% CI: 17.67, 86.01) in the Tigray region,  
18 24.63% (95% CI: 10.52, 37.75) in the South Nation and Nationalities People Region, and the  
19 lowest was seen in three studies conducted using demographic health data, 12.10% (95% CI:  
20 5.66, 18.50) (supplementary figure 5).  
21  
22  
23  
24  
25  
26

27 Furthermore, subgroup analysis reveals that the highest pooled prevalence of abortion was seen  
28 among gynecological admitted patients, at 60.60% (95% CI: 59.47, 61.73), followed by 25.38%  
29 (95% CI: 9.39, 41.32) among university/college students, and 27.90% (95% CI: 20.01, 35.79)  
30 among insecurely housed women, with the lowest pooled prevalence being seen among pregnant  
31 women and youth women (supplementary figure 6). Additionally, subgroup analysis was  
32 conducted based on the year before and after the Millennium Development Goals'  
33 implementation. The pooled prevalence of pregnancy termination before and after MDGs was  
34 20.55% (95% CI: 16.10–24.99) and 21.61% (95% CI: 15.01–28.03), respectively (supplementary  
35 figure 7).  
36  
37  
38  
39  
40  
41  
42  
43  
44  
45  
46  
47  
48  
49  
50  
51  
52  
53  
54  
55  
56  
57  
58  
59  
60

Table 1: Subgroup analysis for the prevalence of pregnancy termination in Ethiopia, 2004-2022

| Subgroup                      | Number of studies | Total Sample | Prevalence (95%CI)          | Heterogeneity  |                   |
|-------------------------------|-------------------|--------------|-----------------------------|----------------|-------------------|
|                               |                   |              |                             | I <sup>2</sup> | p-value           |
| <b>By region</b>              |                   |              |                             |                |                   |
| Addis Ababa                   | 2                 | 855          | 25.49(10.39, 40.09)         | 92.4           | < 0.001           |
| Amhara                        | 6                 | 2371         | 18.06(6.27, 29.85)          | 99.0           | < 0.001           |
| SNNP                          | 8                 | 3678         | 24.63(95% CI: 10.52, 37.75) | 99.4           | < 0.001           |
| National Data                 | 3                 | 19854        | 12.10(5.70, 18.50)          | 99.7           | < 0.001           |
| Tigray                        | 2                 | 7463         | 34.17(17.6, 86.01)          | 99.9           | < 0.001           |
| Harari                        | 2                 | 1835         | 16.13(12.21, 20.05)         | 81.2           | < 0.001           |
| Oromia                        | 1                 | 194          | 35.60(28.86, 42.34)         | .              | .                 |
| Afar                          | 1                 | 509          | 8.80(6.34, 11.26)           | .              | .                 |
| <b>By publication year</b>    |                   |              |                             |                |                   |
| 2016 to 2022 (post MDG)       | 15                | 24234        | 20.55(16.10, 24.99)         | 99.3           | < 0.001           |
| Before MDG                    | 10                | 12525        | 22.61(4.55, 40.66)          | 99.9           | < 0.001           |
| <b>Study population</b>       |                   |              |                             |                |                   |
| Reproductive age              | 8                 | 4426         | 17.03(8.55, 25.52)          | 99.0           | < 0.001           |
| Pregnant women                | 1                 | 12378        | 8.90 (8.40, 9.40)           | .              | .                 |
| Abortion care seeker          | 7                 | 2990         | 21.19(14.65, 27.72)         | 95.3           | < 0.001           |
| University or college student | 6                 | 3237         | 25.36 (9.39, 41.32)         | 99.5           | < 0.001           |
| Gynecological patient         | 1                 | 7203         | 60.60 (59.47, 61.73)        | .              | .                 |
| Youth women                   | 1                 | 6401         | 2.50 (2.12, 2.88)           | .              | .                 |
| Insecurely housed women       | 1                 | 124          | 27.90 (20.01, 35.79)        | .              | .                 |
| <b>Total</b>                  | <b>25</b>         | <b>36759</b> | <b>21.52(15.01, 28.03)</b>  | <b>99.8</b>    | <b>&lt; 0.001</b> |

Insecurely household women: it means women who live or spend their time on the street.

## Determinants of pregnancy termination

### Socio-demographic characteristics

The sociodemographic factors included in this analysis were the place of residence, age, marital, occupational, and educational status of the women. A separate analysis was conducted for each variable. Finally, a meta-analysis of (16, 39) two studies showed that being a student was



1  
2  
3 significantly associated with pregnancy termination (OR: 4.85; 95% CI: 1.98, 11.91). There was  
4 moderate heterogeneity ( $I^2 = 39\%$ ) (supplementary figures 8 and 9).  
5  
6

### 7 **Reproductive characteristics**

8  
9  
10 A total of 5 articles (15, 24, 28, 43, 47) were included to assess the association between first  
11 sexual initiation before the age of 18 and pregnancy termination. The pooled meta-analysis found  
12 that women who had their first sexual experience before the age of 18 were twice as likely as  
13 those who had their first sexual experience after the age of 18 to have their pregnancy terminated  
14 (OR = 1.78; 95% CI = 1.13, 2.82). There was moderate heterogeneity ( $I^2 = 41.6\%$ ). Moreover,  
15 two articles (11, 43) were also included to determine the association between irregular menstrual  
16 bleeding and pregnancy termination. The final pooled meta-analysis using data from the two  
17 articles found that pregnancy termination was nearly two times more likely to occur in women  
18 with irregular menstrual bleeding than in those who had regular menstrual bleeding, (OR = 1.86;  
19 95% CI = 1.25, 2.77). Similarly, a meta-analysis of six studies (14, 15, 24, 32, 34, 43) showed  
20 that women who had multiple sexual partners were significantly associated with pregnancy  
21 termination (OR: 4.88; 95% CI: 3.43, 6.93). There was low heterogeneity ( $I^2 = 13.4\%$ )  
22 (supplementary figures 10).  
23  
24  
25  
26  
27  
28  
29  
30  
31  
32  
33  
34  
35  
36  
37  
38  
39  
40  
41  
42  
43  
44  
45  
46  
47  
48  
49  
50  
51  
52  
53  
54  
55  
56  
57  
58  
59  
60

## Discussion

Pregnancy termination is a major public health concern in Ethiopia (49). In this systematic review and meta-analysis, the overall magnitude of pregnancy termination was pooled from 25 published articles in Ethiopia, and significant determinants of pregnancy termination were identified using different articles. Being a student increased the rate of termination of pregnancy nearly five times. In addition, first sexual initiation before the age of 18, women with irregular menstrual bleeding, and multiple sexual partners were determinants of pregnancy termination in Ethiopia. The findings of this review revealed evidence to help reduce the impact of pregnancy termination in Ethiopia by aiming at the main determinants for pregnancy termination.

In Ethiopia various studies have been conducted on the issue of pregnancy termination, involving different settings such as the community, healthcare institutions, and higher education institutions. These studies have yielded varying figures regarding the prevalence of pregnancy termination in the country. However, this particular study revealed Ethiopia has a higher prevalence of pregnancy termination compared to other low- and middle-income countries.

The study found that the pooled prevalence of termination of pregnancy in Ethiopia was 21.52%. This finding is lower compared to a study done in Ghana at 25% (50), higher than in Mozambique at 9 % ( $\times 2.33$ ) (50), and in India at 1.7% ( $\times 12$ ) (51). The difference could be attributed to various factors like; study population, study design, study area, socio-demographic characteristics, and the differences in health policies of the countries. Additionally, the current study utilized a meta-analysis approach at the national level, incorporating community or institutional studies, while the study in Ghana and Mozambique was conducted using demographic health data with a small sample size compared to the current study (50). Additionally, in our study, huge variations were seen across the regions. A spatial analysis study conducted in Ethiopia using national DHS data also also showed variation even within the regions of the country (48). Thus, acting according to the needs of the region and age-specific policy is important during national policy or guideline development.

Our study observed that being a student was significantly associated with the termination of pregnancy. One of the possible explanations could be that students are likely to be adolescents, belonging to the younger age category. In addition, adolescent girls are remaining in school

1  
2  
3 longer, which may factor into their decisions to postpone childbearing and terminate unintended  
4 pregnancies (52). Likewise, a study conducted in India shows the tendency for pregnancy  
5 termination is high in this age category since the rate of unintended pregnancies and unmet needs  
6 for family planning are high in this age group (53). The higher rate of pregnancy termination  
7 could also be attributed to a failure to provide education about the risks of pregnancy termination  
8 and ways of prevention for unintended pregnancy (54).  
9

10  
11  
12  
13  
14 Additionally, the idea supported by Van Rensburg that societal poverty, unemployment, and  
15 other socio-demographic factors affect youth pregnancies and it might prone to pregnancy  
16 termination (55). In addition, a review from the late 1990s found that young women often cited a  
17 desire to stay in school as a major reason for pregnancy termination (56). Moreover, many  
18 adolescents continue to have difficulty accessing contraception, often as a result of stigma and/or  
19 a lack of resources (57).  
20  
21  
22  
23  
24

25  
26 The study from Nigeria indicated that 15–24-year old women are still being left behind on  
27 reproductive health matters despite increasing global attention to prioritizing their health (58).  
28 Studies found that educational programs aimed at reducing sexual risk behaviors and preventing  
29 pregnancy among young people can effectively reduce pregnancy rates among teenagers (59).  
30 Also, programs aimed at abstinence-centered sexuality education are effective in preventing  
31 adolescent pregnancy (60). Thus, this implies a future focus on reproductive health issues  
32 specific to students to address their needs. Additionally, future researchers should better focus on  
33 possible interventions to reduce the risk of pregnancy and pregnancy termination among students.  
34  
35  
36  
37  
38  
39

40  
41 This review also assessed the association of selected variables with pregnancy termination.  
42 Women under the age of 18 at first sex were significantly more likely to terminate their  
43 pregnancy. This finding is consistent with studies conducted in Nigeria and Peru that reported a  
44 higher rate of pregnancy termination among women who had their age at first sex before 18  
45 years old (61-63). Studies also revealed that early sexual debuts are significantly associated with  
46 adolescent pregnancies, which are usually unwanted (64, 65). As well, a study conducted in  
47 Ethiopia shown initiation of sexual intercourse before the age of 18 years was found significant  
48 association with repeated pregnancy termination (66).  
49  
50  
51  
52  
53  
54  
55  
56  
57  
58  
59  
60

1  
2  
3 In many low income countries, rising ages at first marriage combined with increasing levels of  
4 premarital sex continue to result in unintended pregnancies among adolescents (67). Thus,  
5 improving the knowledge of adolescents about sexual and reproductive health issues, and  
6 increasing contraceptive access and use among young people, are important to prevent unsafe  
7 abortion or pregnancy termination (68). This necessitates the development of reproductive health  
8 education specifically for adolescent girls. Future researchers should also address the gap in  
9 studies on the needs of adolescent girls and possible interventions needed to reduce sexual  
10 initiation before the age of 18 years.  
11

12  
13 Furthermore, at the individual level, we found that pregnancy termination was significantly  
14 associated with women who had multiple sexual partners. Likewise, a study conducted in Peru  
15 indicated that as the number of sexual partners increased, the odds of getting a pregnancy  
16 termination increased (69). Studies conducted in Cambodia, China, and the United Kingdom also  
17 have found that having multiple sexual partners is associated with a higher rate of repeated  
18 pregnancy termination. (54, 70, 71). The government shall be emphasized reproductive health  
19 education, particularly for women regarding the risks of multiple sexual partners, the access  
20 where, and how to get counseling on how to prevent pregnancy.  
21

22  
23 This study also found that pregnancy termination was two times higher among women who had  
24 menstrual irregularities compared to their counterparts. Lastly, this systematic review and meta-  
25 analysis indicated that there were no statistical association between the termination of pregnancy  
26 and rural residents, marital status, women's age, educational status, primiparous, history of  
27 abortion, and wanted pregnancy.  
28

29  
30 As a limitation, this finding might be prone to the risk of bias due to the significant heterogeneity  
31 of articles included from a different region of Ethiopia. In addition, differences in the study  
32 population, setting, and design within the included studies might influence the results of this  
33 review. Moreover, studies conducted in health institutions, Colleges, or higher education might  
34 affect the pooled estimates. Additionally, in this review, only published articles were included.  
35 Also, this review didn't include qualitative studies on the explanations for pregnancy  
36 termination.  
37  
38  
39  
40  
41  
42  
43  
44  
45  
46  
47  
48  
49  
50  
51  
52  
53  
54  
55  
56  
57  
58  
59  
60

1  
2  
3 Future research must explain the relationship between pregnancy termination and other  
4 determinants such as social, economic, substance use, peer pressure, alcohol use, sexual or  
5 physical violence, and knowledge of sexual and reproductive health issues such as family  
6 planning and fertility.  
7  
8  
9

## 10 11 **Conclusions**

12  
13  
14 One in every five women had their pregnancies terminated, which is a high rate when compared  
15 to Sub-Saharan countries. Being a student was significantly associated with the termination of a  
16 pregnancy. In addition, irregular menstrual bleeding, early initiation of sexual intercourse, and  
17 multiple sexual partners were important determinants of pregnancy termination.  
18  
19  
20

## 21 22 **Abbreviations**

23  
24  
25 OR: odds ratios; CI: confidence interval; JBI: Joanna Briggs Institute; MDG: Millennium  
26 Development Goals'  
27  
28  
29

## 30 31 **Declarations**

32  
33 **Ethical approval:** This article was conducted using published articles. Therefore, it don't  
34 required ethical approval.  
35

36 **Funding:** No funding was used in this study.

37  
38 **Availability of data and materials:** The datasets used and analyzed during the review are  
39 available from the corresponding author upon reasonable request.  
40

41 **Competing interests:** None declared.

42  
43 **Author contributions:** HK, MWA, AB, EM, TH, and LAT conducted the data curation and  
44 extraction. HK, LAT, EM, and MWA. wrote the original and final draft of the research. LAT, EM,  
45 MWA and HK were conducted formal analyses and data interpretation. All authors read and  
46 approved the final manuscript.  
47  
48  
49

## 50 51 **Supplementary file**

52  
53 The supplementary file contains the data extraction sheet for the study included in the review as  
54 supplementary table 1 and supplementary figures 1-10.  
55  
56  
57

## References

1. Mesce D, Clifto D. Abortion facts and figures; population reference bureau. Geneva: WHO. 2011.
2. Bearak J, Popinchalk A, Ganatra B, Moller A-B, Tunçalp Ö, Beavin C, et al. Unintended pregnancy and abortion by income, region, and the legal status of abortion: estimates from a comprehensive model for 1990–2019. *The Lancet Global Health*. 2020;8(9):e1152-e61.
3. Ganatra B, Gerdtts C, Rossier C, Johnson Jr BR, Tunçalp Ö, Assifi A, et al. Global, regional, and subregional classification of abortions by safety, 2010–14: estimates from a Bayesian hierarchical model. *The Lancet*. 2017;390(10110):2372-81.
4. Singh S, Maddow - Zimet I. Facility - based treatment for medical complications resulting from unsafe pregnancy termination in the developing world, 2012: a review of evidence from 26 countries. *BJOG: An International Journal of Obstetrics & Gynaecology*. 2016;123(9):1489-98.
5. Vlassoff M, Shearer J, Walker D, Lucas H. Economic impact of unsafe abortion-related morbidity and mortality: evidence and estimation challenges: Institute of Development Studies Brighton, UK; 2008.
6. DeCherney AH NL, Laufer N, Roman AS. Contraception and family, gynecology. pcdatioa, 2007. teUSTM-HC.
7. Ababa A. Federal democratic republic of Ethiopia ministry of health. Ethiopia: Postnatal Care. 2003.
8. Gebrehiwot Y, Fetters T, Gebreselassie H, Moore A, Hailemariam M, Dibaba Y, et al. Changes in Morbidity and Abortion Care in Ethiopia After Legal Reform: National Results from 2008 and 2014. *Int Perspect Sex Reprod Health*. 2016;42(3):121-30.
9. Singh S, Fetters T, Gebreselassie H, Abdella A, Gebrehiwot Y, Kumbi S, et al. The estimated incidence of induced abortion in Ethiopia, 2008. *International perspectives on sexual and reproductive health*. 2010:16-25.
10. Alemayehu B, Addissie A, Ayele W, Tiroro S, Woldeyohannes D. Magnitude and associated factors of repeat induced abortion among reproductive age group women who seeks abortion Care Services at Marie Stopes International Ethiopia Clinics in Addis Ababa, Ethiopia. *Reproductive health*. 2019;16(1):1-10.
11. Mulat A, Bayu H, Mellie H, Alemu A. Induced second trimester abortion and associated factors in Amhara region referral hospitals. *BioMed research international*. 2015;2015:256534.
12. Tesfaye B, Tewabe M, Ferede A, Dawson A. Induced second trimester abortion and associated factors at debre Markos referral hospital: cross-sectional study. *Women's Health*. 2020;16:1745506520929546.
13. Tesfaye G, Hambisa MT, Semahegn A. Induced abortion and associated factors in health facilities of Guraghe zone, southern Ethiopia. *Journal of pregnancy*. 2014;2014.
14. Denberu B, Alemseged F, Segni H. Determinants of abortion among youth seeking reproductive health Care in Selected Health Facilities, in Addis Ababa, Ethiopia. *Global Journal of Reproductive Medicine*. 2017;1(2):27-38.
15. Behulu GK, Fenta EA, Aynalem GL. Repeat induced abortion and associated factors among reproductive age women who seek abortion services in Debre Berhan town health institutions, Central Ethiopia, 2019. *BMC research notes*. 2019;12(1):1-5.
16. Tilahun F, Dadi AF, Shiferaw G. Determinants of abortion among clients coming for abortion service at felegehiwot referral hospital, northwest Ethiopia: a case control study. *Contraception and reproductive medicine*. 2017;2(1):1-6.
17. Aromataris E, Munn Z. Joanna Briggs Institute reviewer's manual. The Joanna Briggs Institute. 2017;2018.
18. 2014 KAAOBAftooARA.

19. Higgins JP, Thompson SG, Deeks JJ, Altman DG. Measuring inconsistency in meta-analyses. *Bmj*. 2003;327(7414):557-60.
20. Begg CB, Mazumdar M. Operating characteristics of a rank correlation test for publication bias. *Biometrics*. 1994;1088-101.
21. Egger M, Smith GD, Schneider M, Minder C. Bias in meta-analysis detected by a simple, graphical test. *Bmj*. 1997;315(7109):629-34.
22. Duval S, Tweedie R. A nonparametric "trim and fill" method of accounting for publication bias in meta-analysis. *Journal of the american statistical association*. 2000;95(449):89-98.
23. Ayenew G, Gedefaw M, Berhe R, Nigusie A. Current Status, and Correlates of Abortion among Rural Women of Gonji Kollala District, Northwest Ethiopia. *Open Journal of Epidemiology*. 2015;5:136-46.
24. Waktola MI, Mekonen DG, Nigussie TS, Cherkose EA, Abate AT. Repeat induced abortion and associated factors among women seeking abortion care services at Debre Markos town health institutions, Amhara regional state, Ethiopia, 2017. *BMC Res Notes*. 2020;13(1):44-.
25. Mariam T, Melkamu S, Yetwale F, Abdela M, Getnet M. Prevalence and Associated Factors of Unsafe Abortion among Women of Reproductive Age Group in Gondar Town, Northwest Ethiopia, 2017: A Community-based Cross-sectional Study. *Journal of Advances in Medicine and Medical Research*. 2018;28:1-7.
26. Getahun H, Berhane Y. Abortion among rural women in north Ethiopia. *International Journal of Gynecology & Obstetrics*. 2000;71(3):265-6.
27. Animaw W, Bogale B. Abortion in university and college female students of Arba Minch town, Ethiopia, 2011. *Sexual & Reproductive Healthcare*. 2014;5(1):17-22.
28. Beyene BB, Meshesha B. Magnitude And Associated Factors Of Induced Abortion Among Regular Undergraduate Students Of Dilla University. *International journal of scientific and research publications*. 2020;10:10032.
29. Sahile A, Shiferaw M. Magnitude of Induced Abortion and Associated Factors among Female Students of Hawassa University, Southern Region, Ethiopia, 2019. *Journal of pregnancy*. 2020;2020:1-6.
30. Gelaye AA, Taye KN, Mekonen T. Magnitude and risk factors of abortion among regular female students in Wolaita Sodo University, Ethiopia. *BMC Women's Health*. 2014;14(1):50.
31. Nigussie T, Feyisa M, Yosef T, Berhanu M, Asefa A. Prevalence of induced abortion and its associated factors among female students of health science in South West Ethiopia. *The Open Nursing Journal*. 2020;14(1).
32. Abebe M, Mersha A, Degefa N, Gebremeskel F, Kefelew E, Molla W. Determinants of induced abortion among women received maternal health care services in public hospitals of Arba Minch and Wolayita Sodo town, southern Ethiopia: unmatched case-control study. *BMC women's health*. 2022;22(1):1-12.
33. Lentiro K, Gebru T, Worku A, Asfaw A, Gebremariam T, Tesfaye A. Risk factors of induced abortion among preparatory school student in Guraghe zone, Southern region, Ethiopia: a cross-sectional study. *BMC Women's Health*. 2019;19(1):1-7.
34. Alemu K, Birhanu S, Fekadu L, Endale F, Tamene A, Habte A. Safe abortion service utilization and associated factors among insecurely housed women who experienced abortion in southwest Ethiopia, 2021: A community-based cross-sectional study. *Plos one*. 2022;17(8):e0272939.
35. Gebeyehu D, Admassu B, Sinega M, Haile M. Assessment of Prevalence and Reasons for Termination of Pregnancy at Jimma University Teaching Hospital, Ethiopia. *Universal Journal of Public Health*. 2015;3:251-5.
36. Megersa BS, Ojengbede OA, Deckert A, Fawole OI. Factors associated with induced abortion among women of reproductive age attending selected health facilities in Addis Ababa, Ethiopia: a case control study. *BMC Women's Health*. 2020;20(1):1-11.

- 1  
2  
3 37. Wassie AY, Lemlem SB, Boka A. Knowledge, Practice and Associated Factors Towards Medication  
4 Abortion Among Reproductive-Age Women in Sexual and Reproductive Health Clinics of Addis Ababa,  
5 Ethiopia, 2018: Cross-Sectional Study. *International Journal of Women's Health*. 2021;13:489.
- 6 38. Bulti F, Gela D, Dinagde N. Knowledge of Safe Abortion Care Services and Associated Factors  
7 Among Women of Reproductive Age Working at Non-Health Sector Public Institutions in Addis Ababa,  
8 Ethiopia. 2021.
- 9 39. Jamie AH, Abdosh MZ. Prevalence of induced abortion and associated factors among women of  
10 reproductive age in Harari region, Ethiopia. *Public Health of Indonesia*. 2020;6(2):35-40.
- 11 40. Mohammed M, Wesenu M. Prevalence and determinants associated with second trimester  
12 termination of pregnancy in Harari city, Ethiopia; Cross sectional study. 2021.
- 13 41. Worku S, Fantahun M. Unintended pregnancy and induced abortion in a town with accessible  
14 family planning services: the case of Harar in eastern Ethiopia. *Ethiopian Journal of Health Development*.  
15 2006;20(2):79-83.
- 16 42. Abera GB, Berhanu B, Kahsay AB, Gebru HB, Aregay A. Assessment of determinants of induced  
17 abortion among child bearing age women attending maternal and child health clinic in Mekelle town,  
18 Tigray, Ethiopia: a cross sectional study. *International Journal of Pharmaceutical Sciences and Research*.  
19 2012;3(12):4745.
- 20 43. Alemayehu M, Yebyo H, Medhanyie AA, Bayray A, Fantahun M, Goba GK. Determinants of  
21 repeated abortion among women of reproductive age attending health facilities in Northern Ethiopia: a  
22 case-control study. *BMC Public Health*. 2017;17(1):1-8.
- 23 44. Gessesew A. Abortion and unwanted pregnancy in Adigrat zonal hospital, Tigray, north Ethiopia.  
24 *African journal of reproductive health*. 2010;14(3):183-8.
- 25 45. Biza N, Habib Y, Bayray A, Reddy PS. MAGNITUDE AND ASSOCIATED FACTORS OF ABORTION  
26 AMONG REGULAR FEMALE STUDENTS OF SAMARA UNIVERSITY, AFAR, ETHIOPIA, 2016. *Medico*  
27 *Research Chronicles*. 2018;5(3):191-201.
- 28 46. Mekbib T-A, Hiwot YG, Fantahun M. SURVEY OF UNSAFE ABORTION IN SELECTED HEALTH  
29 FACILITIES IN ETHIOPIA. *Ethiopian Journal of Reproductive Health*. 2007;1(1):11-.
- 30 47. Gilano G, Hailegebreal S. Determinants of abortion among youth 15–24 in Ethiopia: A multilevel  
31 analysis based on EDHS 2016. *PloS one*. 2021;16(3):e0248228.
- 32 48. Tesema GA, Mekonnen TH, Teshale AB. Spatial distribution and determinants of abortion among  
33 reproductive age women in Ethiopia, evidence from Ethiopian Demographic and Health Survey 2016  
34 data: Spatial and mixed-effect analysis. *PloS one*. 2020;15(6):e0235382.
- 35 49. Abdella A. Maternal mortality trend in Ethiopia. *Ethiopian Journal of Health Development*.  
36 2010;24(1).
- 37 50. Dickson KS, Adde KS, Ahinkorah BO. Socio-economic determinants of abortion among women in  
38 Mozambique and Ghana: evidence from demographic and health survey. *Archives of Public Health*.  
39 2018;76(1):1-10.
- 40 51. Pallikadavath S, Stones RW. Maternal and social factors associated with abortion in India: a  
41 population-based study. *International Family Planning Perspectives*. 2006:120-5.
- 42 52. Grant MJ, Behrman JR. Gender gaps in educational attainment in less developed countries.  
43 *Population and development review*. 2010;36(1):71-89.
- 44 53. Jiang L, Hardee K. Women's education, family planning, or both? Application of multistate  
45 demographic projections in India. *International journal of population research*. 2014;2014.
- 46 54. Demographic E. Addis Ababa, Ethiopia, and Rockville. Maryland, MA, USA: CSA and ICF. 2016.
- 47 55. van Rensburg HC. South Africa's protracted struggle for equal distribution and equitable access-  
48 still not there. *Human resources for health*. 2014;12(1):1-16.
- 49 56. Bankole A, Singh S, Haas T. Reasons why women have induced abortions: evidence from 27  
50 countries. *International family planning perspectives*. 1998:117-52.
- 51  
52  
53  
54  
55  
56  
57  
58  
59  
60



- 1  
2  
3 57. Woog V, Susheela S, Alyssa B, Jesse P. Adolescent womens need for and use of sexual and  
4 reproductive health services in developing countries: Citeseer; 2015.
- 5 58. Onukwugha FI, Magadi MA, Sarki AM, Smith L. Trends in and predictors of pregnancy  
6 termination among 15–24 year-old women in Nigeria: a multi-level analysis of demographic and health  
7 surveys 2003–2018. *BMC Pregnancy and Childbirth*. 2020;20(1):550.
- 8 59. Coyle K, Basen-Enquis K, Kirby D, Parcel G, Banspach S, Collins JL, Baumler ER, Caravajal S,  
9 Harrist, RB. Safer Choices: Long-term impact of a multicomponent school-based HIV, STD, and pregnancy  
10 prevention program. *Public Health Reports*. 2001;116(Suppl 1):82-93.
- 11 60. Cabezón C, Vigil P, Rojas I, Leiva ME, Riquelme R, Aranda W, et al. Adolescent pregnancy  
12 prevention: An abstinence-centered randomized controlled intervention in a Chilean public high school.  
13 *Journal of Adolescent Health*. 2005;36(1):64-9.
- 14 61. Onukwugha FI, Magadi MA, Sarki AM, Smith L. Trends in and predictors of pregnancy  
15 termination among 15–24 year-old women in Nigeria: a multi-level analysis of demographic and health  
16 surveys 2003–2018. *BMC pregnancy and childbirth*. 2020;20(1):1-13.
- 17 62. Cadmus E, Owoaje E. Knowledge about complications and practice of abortion among female  
18 undergraduates in the University of Ibadan, Nigeria. *Annals of Ibadan postgraduate medicine*.  
19 2011;9(1):19-23.
- 20 63. Ahmed S, Ray R. Determinants of pregnancy and induced and spontaneous abortion in a jointly  
21 determined framework: evidence from a country-wide, district-level household survey in India. *Journal*  
22 *of biosocial science*. 2014;46(4):480-517.
- 23 64. Morhe ES, Tagbor HK, Ankobea FK, Danso KA. Reproductive experiences of teenagers in the  
24 Ejisu-Juabeng district of Ghana. *International Journal of Gynecology & Obstetrics*. 2012;118(2):137-40.
- 25 65. Mulugeta Y, Berhane Y. Factors associated with pre-marital sexual debut among unmarried high  
26 school female students in bahir Dar town, Ethiopia: cross-sectional study. *Reproductive health*.  
27 2014;11(1):1-6.
- 28 66. Mekie M, Addisu D, Dagnew E, Necho W. The level and deriving factors of repeat-induced  
29 abortion in Ethiopia: A systematic review and meta-analysis. *Heliyon*. 2021;7(1):e05984.
- 30 67. Wellings K, Collumbien M, Slaymaker E, Singh S, Hodges Z, Patel D, et al. Sexual behaviour in  
31 context: a global perspective. *The Lancet*. 2006;368(9548):1706-28.
- 32 68. WHO. Adolescent pregnancy fact sheet: World Health Organization; 2022 [updated 15  
33 September 2022. Available from: [https://www.who.int/en/news-room/fact-sheets/detail/adolescent-](https://www.who.int/en/news-room/fact-sheets/detail/adolescent-pregnancy)  
34 [pregnancy](https://www.who.int/en/news-room/fact-sheets/detail/adolescent-pregnancy).
- 35 69. Bernabé-Ortiz A, White PJ, Carcamo CP, Hughes JP, Gonzales MA, Garcia PJ, et al. Clandestine  
36 induced abortion: prevalence, incidence and risk factors among women in a Latin American country.  
37 *Cmaj*. 2009;180(3):298-304.
- 38 70. Cheng Y, Wang X, Lv Y, Cai Y, Li Y, Guo X, et al. Study on the risk factors of repeated abortion  
39 among unmarried adolescents. *Zhonghua liu xing bing xue za zhi= Zhonghua liuxingbingxue zazhi*.  
40 2006;27(8):669-72.
- 41 71. Yi S, Tuot S, Chhoun P, Pal K, Tith K, Brody C. Factors associated with induced abortion among  
42 female entertainment workers: a cross-sectional study in Cambodia. *BMJ open*. 2015;5(7):e007947.
- 43  
44  
45  
46  
47  
48  
49  
50  
51  
52  
53  
54  
55  
56  
57  
58  
59  
60

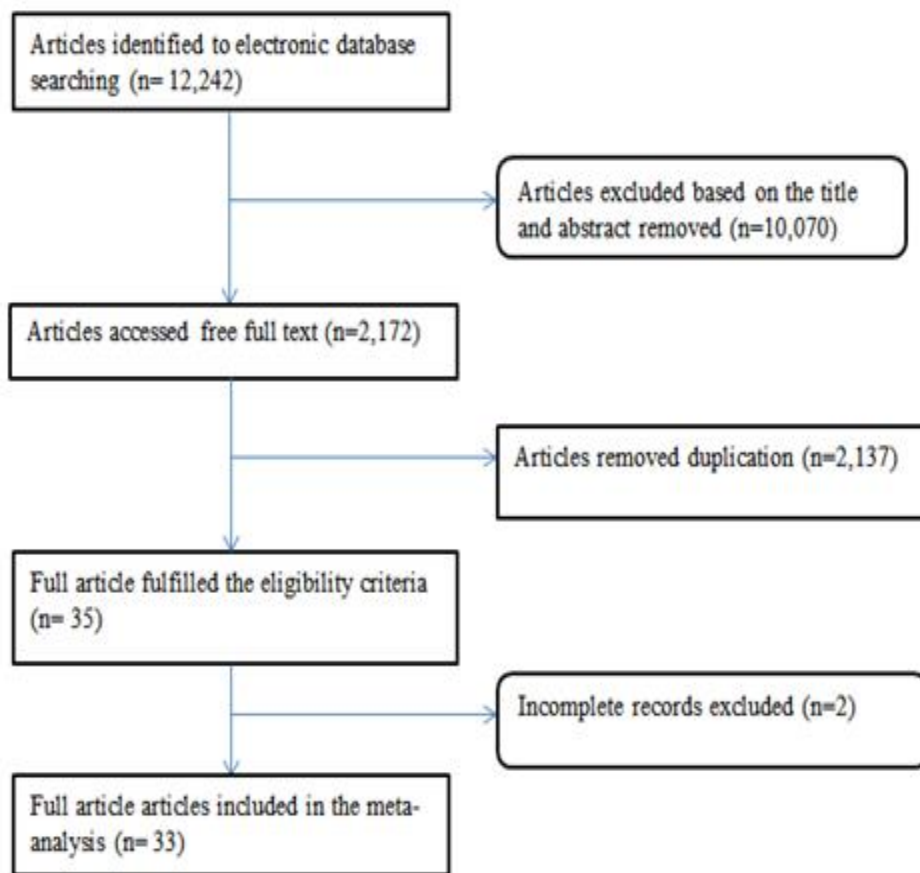

Figure 1. Flow chart of describing the selection of studies for the systematic review and meta-analysis of the prevalence of pregnancy termination and associated factors in Ethiopia, 2023

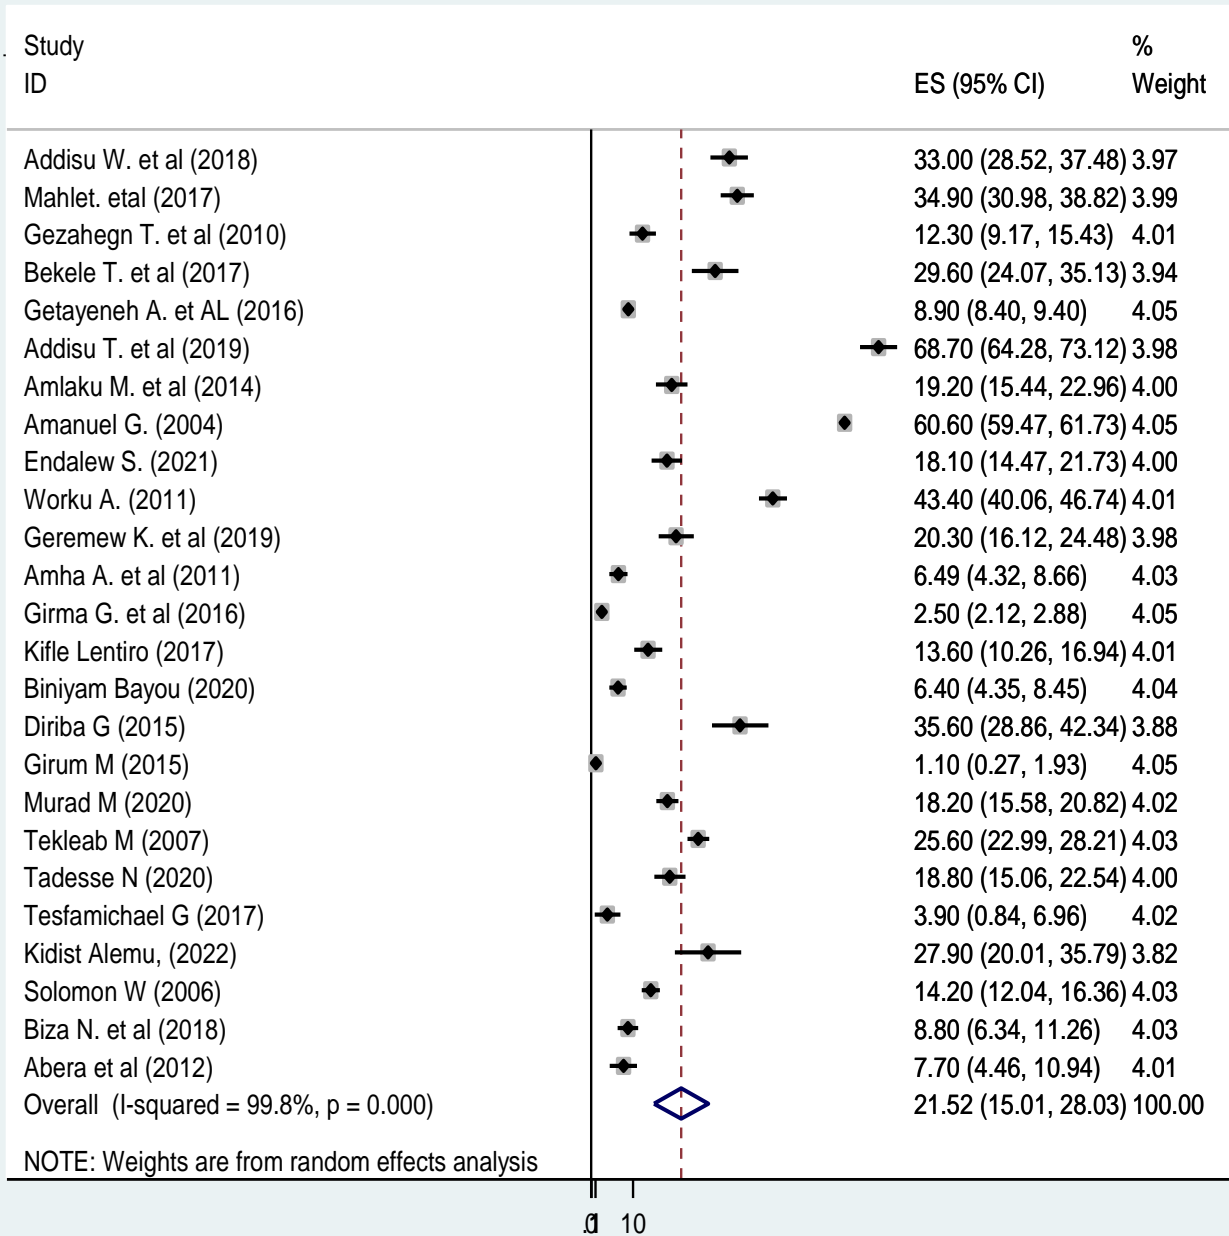

Figure 2: Forest plot of the pooled prevalence of pregnancy termination in Ethiopia, 2023

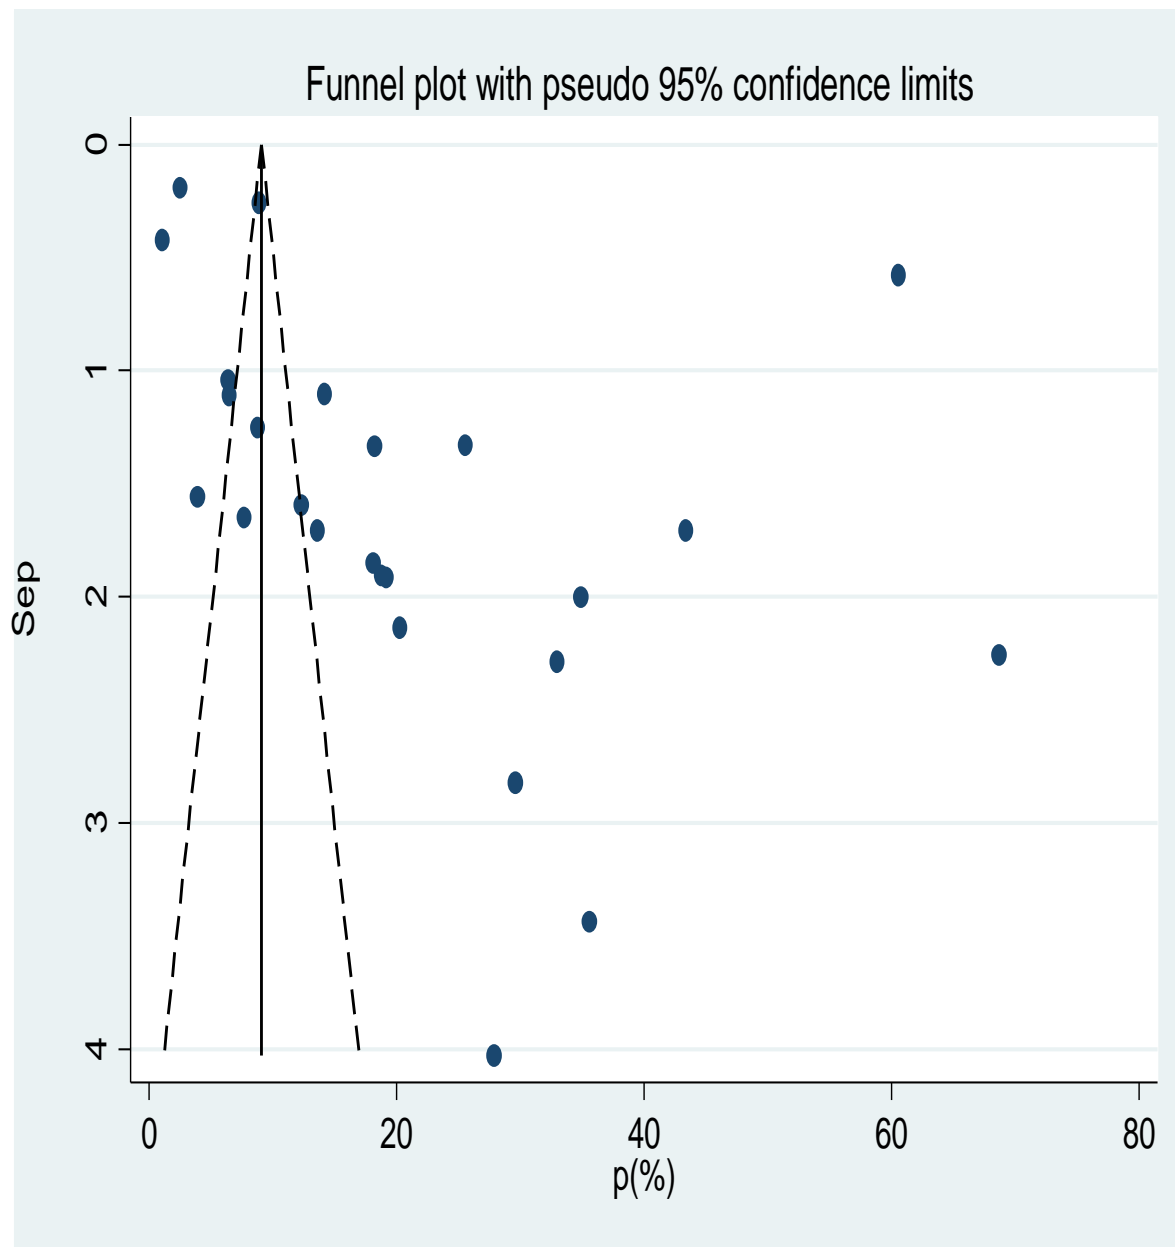

Figure 3: Funnel plot to test publication bias of pregnancy termination in Ethiopia, 2023

1  
2  
3  
4  
5  
6  
7  
8  
9  
10  
11  
12  
13  
14  
15  
16  
17  
18  
19  
20  
21  
22  
23  
24  
25  
26  
27  
28  
29  
30  
31  
32  
33  
34  
35  
36  
37  
38  
39  
40  
41  
42  
43  
44  
45  
46  
47  
48  
49  
50  
51  
52  
53  
54  
55  
56  
57  
58  
59  
60



Figure 4: The Duval and Tweedie nonparametric trim and fill analysis of abortion among women in Ethiopia, 2023

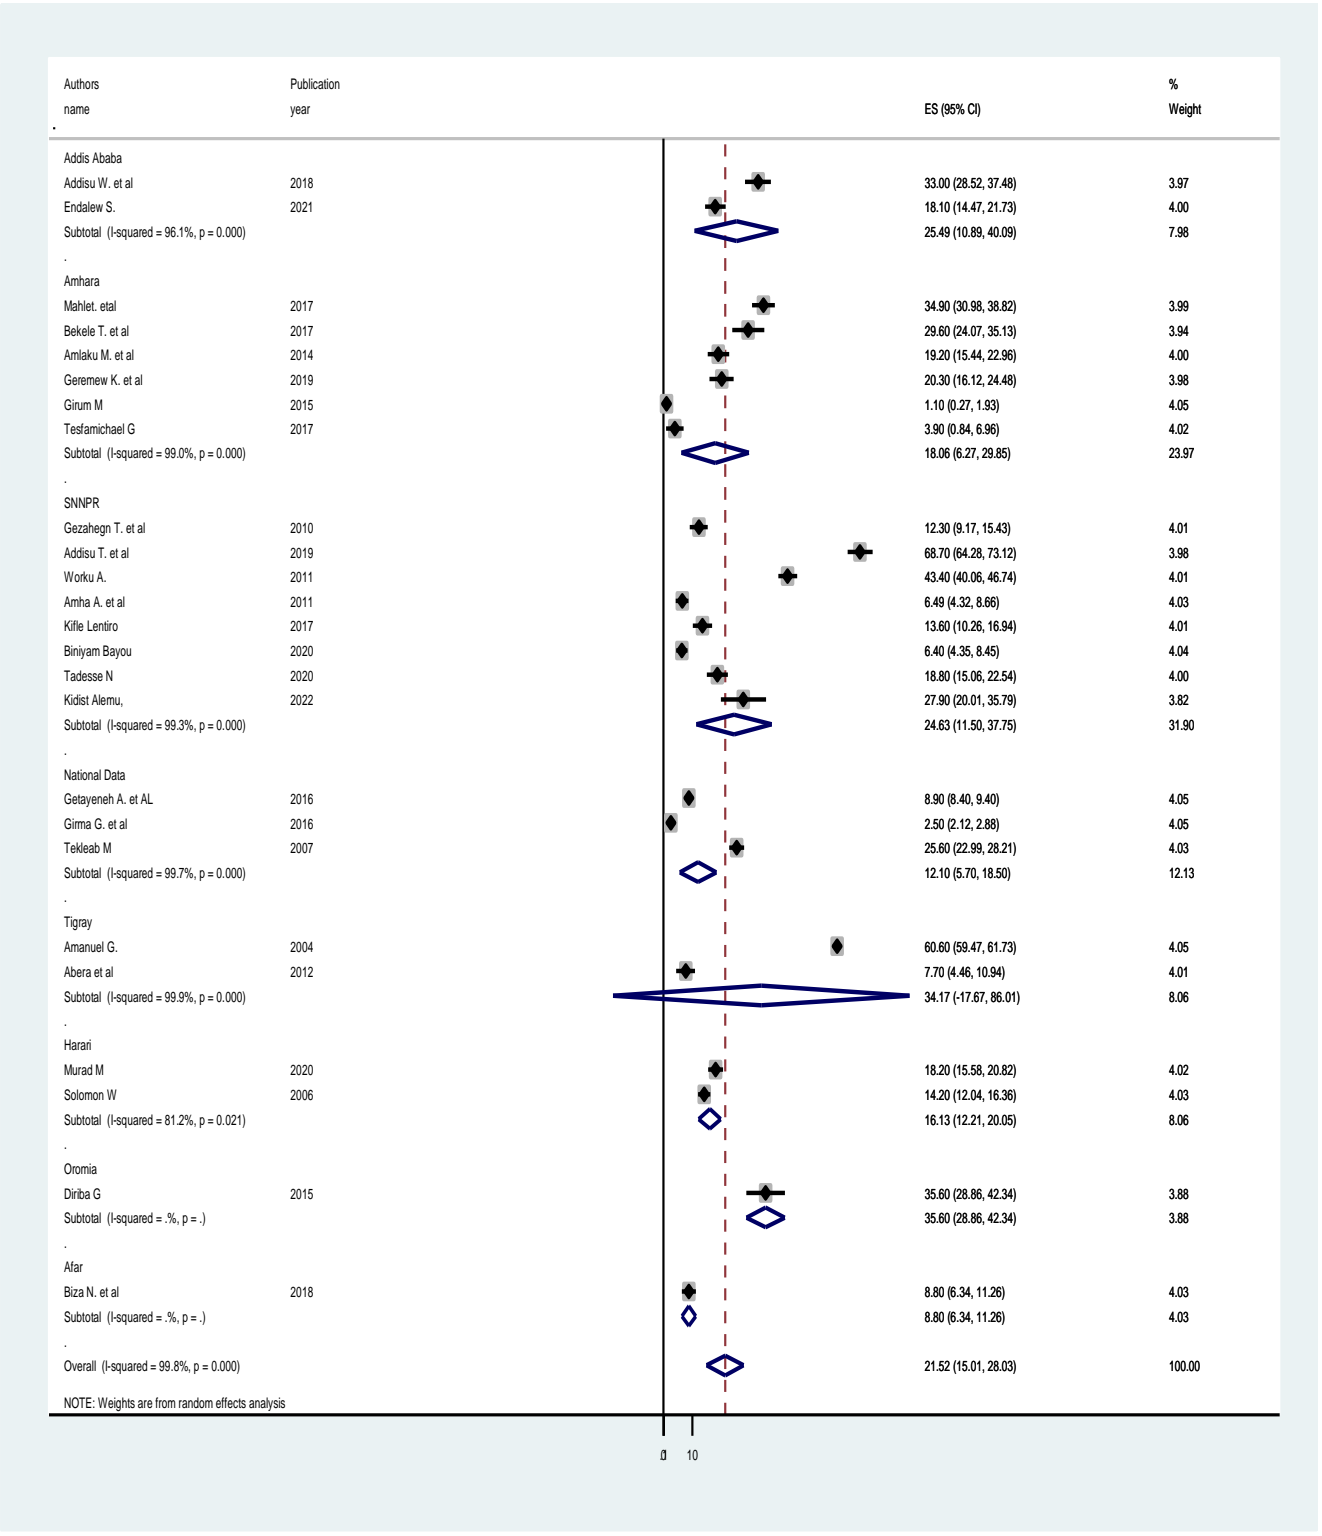

Figure 5: Subgroup analysis of the pregnancy termination based on regional distribution in Ethiopia, 2023



Figure 6: Subgroup analysis of the prevalence of pregnancy termination based on study population in Ethiopia, 2022

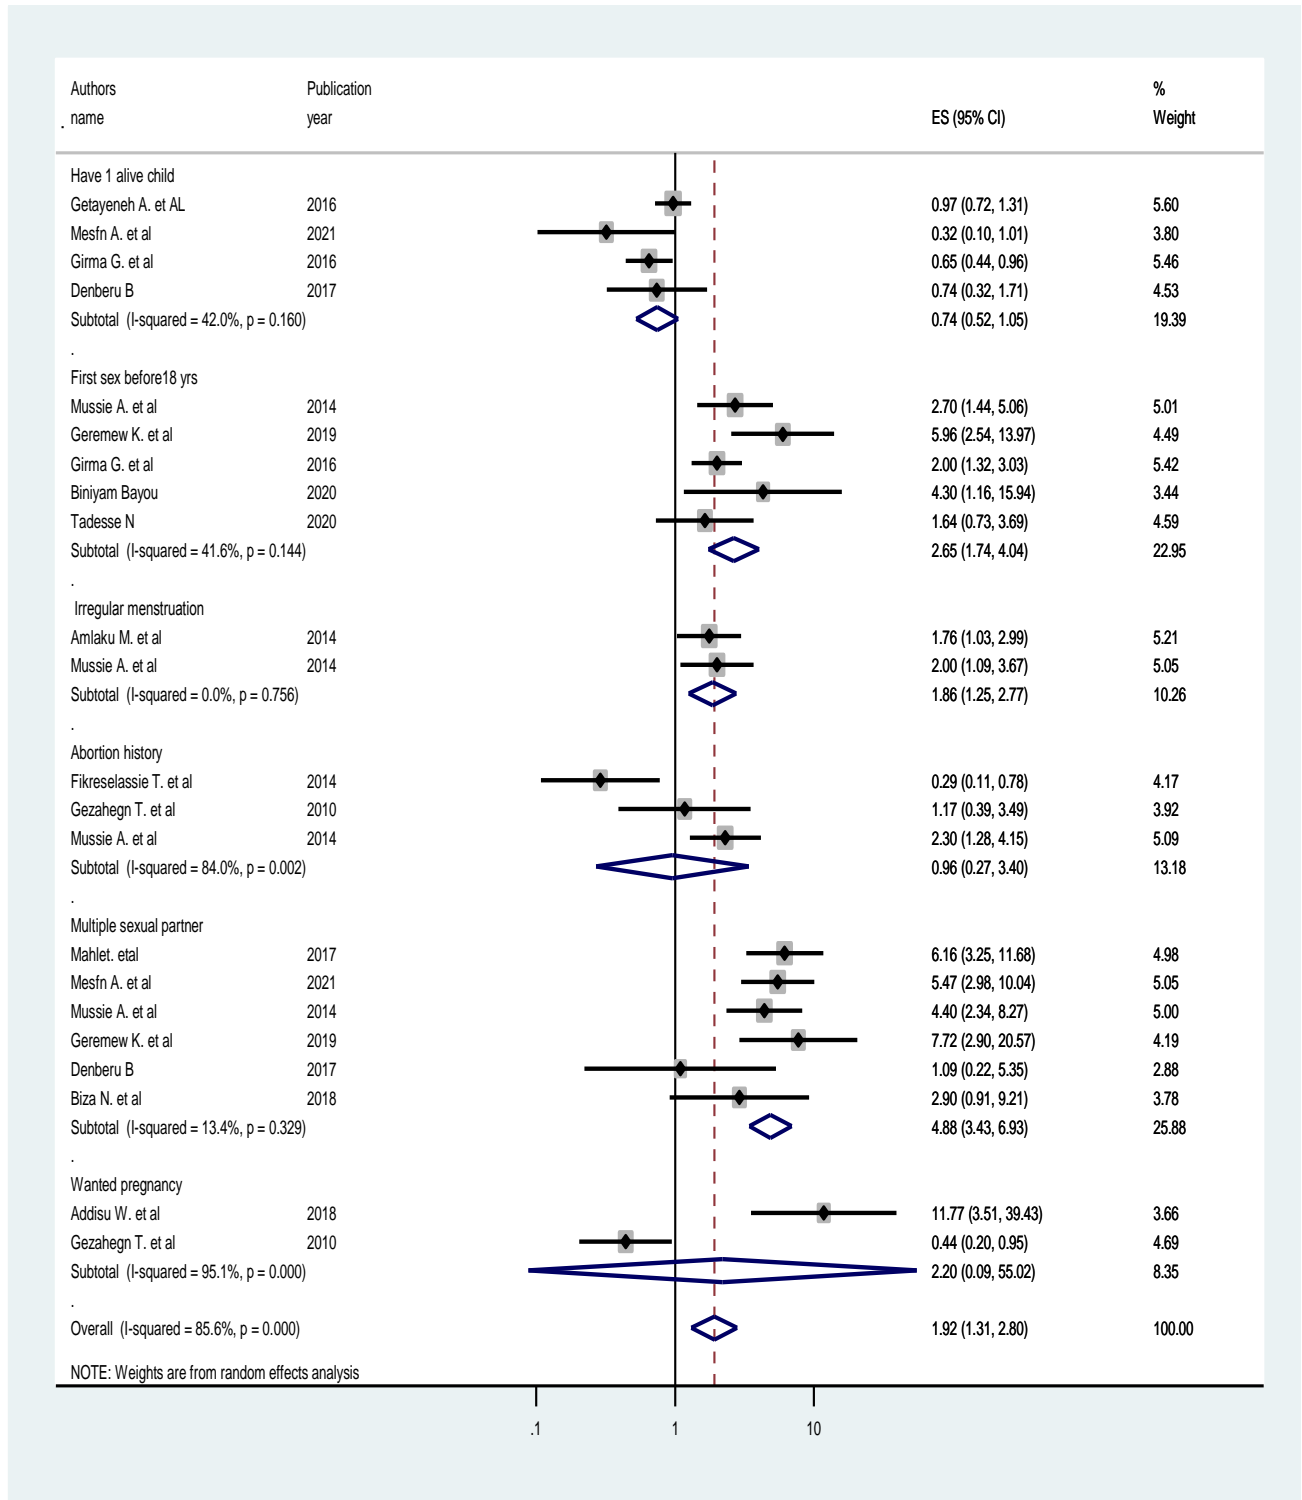

Figure 7: Subgroup analysis of the prevalence of pregnancy termination based on before and after MDG in Ethiopia, 2023





Figure 8: Forest plot of odds ratio for the association of selected socio-demographic characteristics and pregnancy termination in Ethiopia, 2023



Figure 9: Forest plot of odds ratio for the association of selected socio-demographic characteristics and pregnancy termination in Ethiopia, 2023

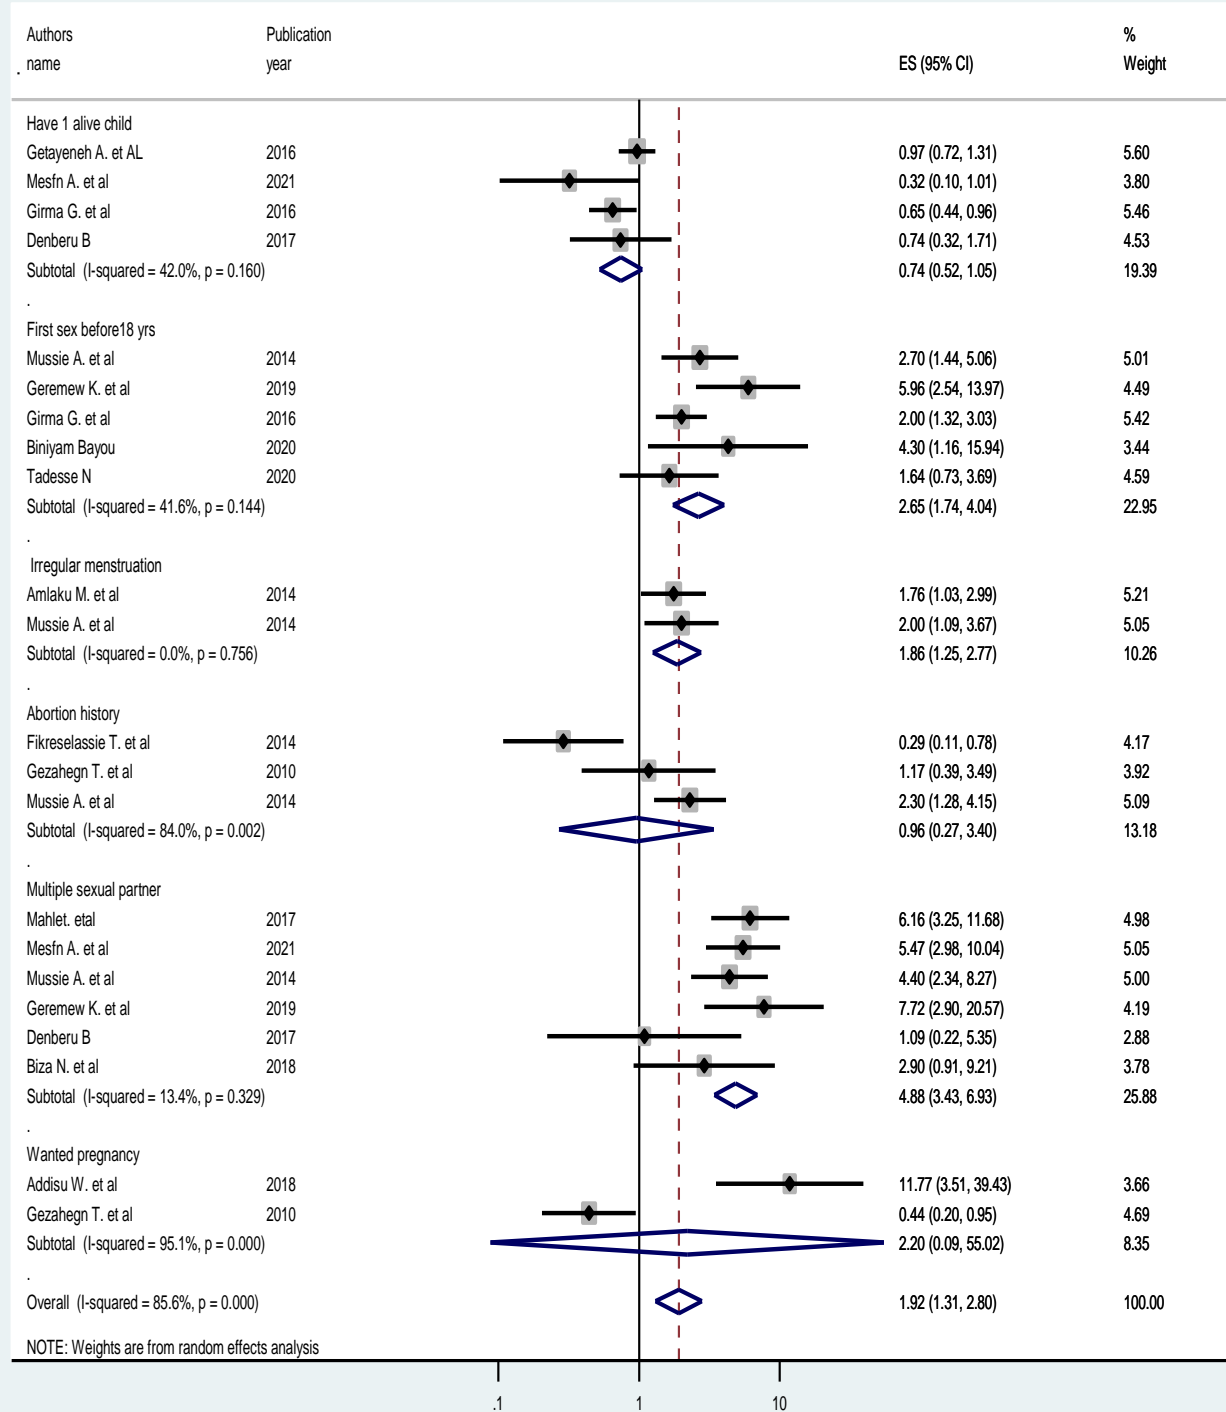

Figure 10: Forest plot of odds ratio for the association of selected reproductive characteristics and pregnancy termination in Ethiopia, 2023

Table 1. Data extraction sheet of the studies

| Authors name            | Publication year | Study area                            | Region        | Study design    | Study setting | Study population               | Sample size |
|-------------------------|------------------|---------------------------------------|---------------|-----------------|---------------|--------------------------------|-------------|
| Addisu W. et al         | 2018             | Addis Ababa                           | Addis Ababa   | Cross-sectional | Institutional | Reproductive age group         | 423         |
| Mahlet T. et al.        | 2017             | Debre Markos                          | Amhara        | Cross-sectional | Institutional | Reproductive age group         | 567         |
| Fikreselassie T. et al. | 2014             | Bahr Dar                              | Amhara        | Case-control    | Institutional | Pregnant women                 | 175         |
| Gezahegn T. et al.      | 2010             | Guraghe Zone                          | SNNP          | Cross-sectional | Institutional | Abortion care service seekers  | 422         |
| Bekele T. et al.        | 2017             | Debre Markos                          | Amhara        | Cross-sectional | Institutional | Abortion care service seekers  | 262         |
| Getayeneh A. et al.     | 2016             | Ethiopia                              | National data | Cross-sectional | Community     | Pregnant women                 | 12378       |
| Addisu T. et al.        | 2019             | Hawassa                               | SNNP          | Cross-sectional | Institutional | University/College students    | 422         |
| Amlaku M. et al.        | 2014             | Amhara region referral hospitals      | Amhara        | Cross-sectional | Institutional | Abortion care service seekers  | 422         |
| Birye D. et al.         | 2019             | Gondar                                | Amhara        | Cross-sectional | Institutional | University/College students    | 648         |
| Amanuel G. et al.       | 2004             | Adigrat                               | Tigray        | Cross-sectional | Institutional | Women with Gynecologic problem | 7203        |
| Endalew S. et al.       | 2021             | Addis Ababa                           | Addis Ababa   | Cross-sectional | Institutional | Reproductive age               | 432         |
| Worku A. et al.         | 2011             | Arba Minch                            | SNNP          | Cross-sectional | Institutional | University/College students    | 845         |
| Mesfn A. et al.         | 2021             | Arba minch & Wolayita Sodo town       | SNNP          | Case control    | Institutional | Reproductive age group         | 413         |
| Bethelihem A. et al.    | 2015             | Addis Ababa                           | Addis Ababa   | Cross-sectional | Institutional | Abortion care service seekers  | 429         |
| Mussie A. et al.        | 2014             | Tigray region health hospitals        | Tigray        | Case control    | Institutional | Abortion care service seekers  | 309         |
| Geremew K. et al.       | 2019             | Debre Berhan town health institutions | Amhara        | Cross-sectional | Institutional | Abortion care service seekers  | 355         |
| Amha A. et al.          | 2011             | Hawassa University                    | SNNP          | Cross-sectional | Institutional | University/College students    | 493         |

|                        |      |                              |               |                 |               |                               |      |
|------------------------|------|------------------------------|---------------|-----------------|---------------|-------------------------------|------|
| Girma G. et al.        | 2016 | Ethiopia                     | National data | Cross-sectional | Community     | Youth women                   | 6401 |
| Kifle L. et al.        | 2017 | Guraghe zone                 | SNNP          | Cross-sectional | Institutional | Reproductive age              | 404  |
| Arif H. et al.         | 2020 | Harari                       | Harari        | Cross-sectional | Institutional | Reproductive age group        | 611  |
| Biniyam B. et al.      | 2020 | Dilla University             | SNNPR         | Cross-sectional | Institutional | University/College students   | 548  |
| Denberu B. et al       | 2017 | Addis Ababa                  | Addis Ababa   | Case control    | Institutional | Youth women                   | 330  |
| Diriba G. et al.       | 2015 | Jimma                        | Oromia        | Cross-sectional | Institutional | Abortion care service seekers | 194  |
| Girum M. et al.        | 2015 | Gonji Kollela District       | Amhara        | Cross-sectional | Community     | Reproductive age group        | 611  |
| Murad M. et al.        | 2020 | Harar                        | Harari        | Cross-sectional | Institutional | Reproductive age group        | 835  |
| Tekleab M. et al.      | 2007 | Ethiopia                     | National data | Cross-sectional | Institutional | Abortion care service seekers | 1075 |
| Tadesse N. et al.      | 2020 | Mizan Tepi University        | SNNP          | Cross-sectional | Institutional | University/College students   | 420  |
| Tesfamichael G. et al. | 2017 | Gondar                       | Amhara        | Cross-sectional | Community     | Reproductive age              | 154  |
| Kidist A. et al        | 2022 | Jimma, Bonga, and Mizan-Aman | SNNPR         | Cross-sectional | Community     | Insecurely housed women       | 124  |
| Solomon W. et al       | 2006 | Harer                        | Harari        | Cross-sectional | Community     | Reproductive age              | 1000 |
| Biza N. et al.         | 2018 | Semera                       | Afar          | Cross-sectional | Institutional | University/College students   | 509  |
| Abera et al.           | 2012 | Mekelle                      | Tigray        | Cross-sectional | Institutional | Abortion care seekers         | 260  |

Table 2: Characteristics of the studies for the prevalence of pregnancy termination in Ethiopia, 2004-2022

| Authors name            | Publication year | Study area                       | Region        | Study design    | Study setting | Study population               | Sample size |
|-------------------------|------------------|----------------------------------|---------------|-----------------|---------------|--------------------------------|-------------|
| Addisu W. et al         | 2018             | Addis Ababa                      | Addis Ababa   | Cross-sectional | Institutional | Reproductive age group         | 423         |
| Mahlet T. et al.        | 2017             | Debre Markos                     | Amhara        | Cross-sectional | Institutional | Reproductive age group         | 567         |
| Fikreselassie T. et al. | 2014             | Bahr Dar                         | Amhara        | Case-control    | Institutional | Pregnant women                 | 175         |
| Gezahegn T. et al.      | 2010             | Guraghe Zone                     | SNNP          | Cross-sectional | Institutional | Abortion care service seekers  | 422         |
| Bekele T. et al.        | 2017             | Debre Markos                     | Amhara        | Cross-sectional | Institutional | Abortion care service seekers  | 262         |
| Getayeneh A. et al.     | 2016             | Ethiopia                         | National data | Cross-sectional | Community     | Pregnant women                 | 12378       |
| Addisu T. et al.        | 2019             | Hawassa                          | SNNP          | Cross-sectional | Institutional | University/College students    | 422         |
| Amlaku M. et al.        | 2014             | Amhara region referral hospitals | Amhara        | Cross-sectional | Institutional | Abortion care service seekers  | 422         |
| Birye D. et al.         | 2019             | Gondar                           | Amhara        | Cross-sectional | Institutional | University/College students    | 648         |
| Amanuel G. et al.       | 2004             | Adigrat                          | Tigray        | Cross-sectional | Institutional | Women with Gynecologic problem | 7203        |
| Endalew S. et al.       | 2021             | Addis Ababa                      | Addis Ababa   | Cross-sectional | Institutional | Reproductive age               | 432         |
| Worku A. et al.         | 2011             | Arba Minch                       | SNNP          | Cross-sectional | Institutional | University/College students    | 845         |
| Mesfn A. et al.         | 2021             | Arba minch & Wolayita Sodo town  | SNNP          | Case control    | Institutional | Reproductive age group         | 413         |
| Bethelihem A. et al.    | 2015             | Addis Ababa                      | Addis Ababa   | Cross-sectional | Institutional | Abortion care service seekers  | 429         |
| Mussie A. et al.        | 2014             | Tigray region health hospitals   | Tigray        | Case control    | Institutional | Abortion care service seekers  | 309         |

|                        |      |                                       |               |                 |               |                               |      |
|------------------------|------|---------------------------------------|---------------|-----------------|---------------|-------------------------------|------|
| Geremew K. et al.      | 2019 | Debre Berhan town health institutions | Amhara        | Cross-sectional | Institutional | Abortion care service seekers | 355  |
| Amha A. et al.         | 2011 | Hawassa University                    | SNNP*         | Cross-sectional | Institutional | University/College students   | 493  |
| Girma G. et al.        | 2016 | Ethiopia                              | National data | Cross-sectional | Community     | Youth women                   | 6401 |
| Kifle L. et al.        | 2017 | Guraghe zone                          | SNNP          | Cross-sectional | Institutional | Reproductive age              | 404  |
| Arif H. et al.         | 2020 | Harari                                | Harari        | Cross-sectional | Institutional | Reproductive age group        | 611  |
| Biniyam B. et al.      | 2020 | Dilla University                      | SNNPR         | Cross-sectional | Institutional | University/College students   | 548  |
| Denberu B. et al       | 2017 | Addis Ababa                           | Addis Ababa   | Case control    | Institutional | Youth women                   | 330  |
| Diriba G. et al.       | 2015 | Jimma                                 | Oromia        | Cross-sectional | Institutional | Abortion care service seekers | 194  |
| Girum M. et al.        | 2015 | Gonji Kollela District                | Amhara        | Cross-sectional | Community     | Reproductive age group        | 611  |
| Murad M. et al.        | 2020 | Harar                                 | Harari        | Cross-sectional | Institutional | Reproductive age group        | 835  |
| Tekleab M. et al.      | 2007 | Ethiopia                              | National data | Cross-sectional | Institutional | Abortion care service seekers | 1075 |
| Tadesse N. et al.      | 2020 | Mizan Tepi University                 | SNNP          | Cross-sectional | Institutional | University/College students   | 420  |
| Tesfamichael G. et al. | 2017 | Gondar                                | Amhara        | Cross-sectional | Community     | Reproductive age              | 154  |
| Kidist A. et al        | 2022 | Jimma, Bonga, and Mizan-Aman          | SNNPR         | Cross-sectional | Community     | Insecurely housed women       | 124  |
| Solomon W. et al       | 2006 | Harer                                 | Harari        | Cross-sectional | Community     | Reproductive age              | 1000 |
| Biza N. et al.         | 2018 | Semera                                | Afar          | Cross-sectional | Institutional | University/College students   | 509  |
| Abera et al.           | 2012 | Mekelle                               | Tigray        | Cross-sectional | Institutional | Abortion care seekers         | 260  |

\*SNNP: South Nations and Nationalities Peoples

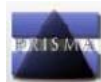

# PRISMA 2020 Checklist

1  
2  
3  
4  
5  
6  
7  
8  
9  
10  
11  
12  
13  
14  
15  
16  
17  
18  
19  
20  
21  
22  
23  
24  
25  
26  
27  
28  
29  
30  
31  
32  
33  
34  
35  
36  
37  
38  
39  
40  
41  
42  
43  
44  
45  
46  
47

| Section and Topic             | Item # | Checklist item                                                                                                                                                                                                                                                                                       | Location where item is reported |
|-------------------------------|--------|------------------------------------------------------------------------------------------------------------------------------------------------------------------------------------------------------------------------------------------------------------------------------------------------------|---------------------------------|
| <b>TITLE</b>                  |        |                                                                                                                                                                                                                                                                                                      |                                 |
| Title                         | 1      | Identify the report as a systematic review.                                                                                                                                                                                                                                                          | 1                               |
| <b>ABSTRACT</b>               |        |                                                                                                                                                                                                                                                                                                      |                                 |
| Abstract                      | 2      | See the PRISMA 2020 for Abstracts checklist.                                                                                                                                                                                                                                                         | 2                               |
| <b>INTRODUCTION</b>           |        |                                                                                                                                                                                                                                                                                                      |                                 |
| Rationale                     | 3      | Describe the rationale for the review in the context of existing knowledge.                                                                                                                                                                                                                          | 3                               |
| Objectives                    | 4      | Provide an explicit statement of the objective(s) or question(s) the review addresses.                                                                                                                                                                                                               | 3                               |
| <b>METHODS</b>                |        |                                                                                                                                                                                                                                                                                                      |                                 |
| Eligibility criteria          | 5      | Specify the inclusion and exclusion criteria for the review and how studies were grouped for the syntheses.                                                                                                                                                                                          | 4-5                             |
| Information sources           | 6      | Specify all databases, registers, websites, organisations, reference lists and other sources searched or consulted to identify studies. Specify the date when each source was last searched or consulted.                                                                                            | 4                               |
| Search strategy               | 7      | Present the full search strategies for all databases, registers and websites, including any filters and limits used.                                                                                                                                                                                 | 4                               |
| Selection process             | 8      | Specify the methods used to decide whether a study met the inclusion criteria of the review, including how many reviewers screened each record and each report retrieved, whether they worked independently, and if applicable, details of automation tools used in the process.                     | 5                               |
| Data collection process       | 9      | Specify the methods used to collect data from reports, including how many reviewers collected data from each report, whether they worked independently, any processes for obtaining or confirming data from study investigators, and if applicable, details of automation tools used in the process. | 5                               |
| Data items                    | 10a    | List and define all outcomes for which data were sought. Specify whether all results that were compatible with each outcome domain in each study were sought (e.g. for all measures, time points, analyses), and if not, the methods used to decide which results to collect.                        | 5                               |
|                               | 10b    | List and define all other variables for which data were sought (e.g. participant and intervention characteristics, funding sources). Describe any assumptions made about any missing or unclear information.                                                                                         | 5                               |
| Study risk of bias assessment | 11     | Specify the methods used to assess risk of bias in the included studies, including details of the tool(s) used, how many reviewers assessed each study and whether they worked independently, and if applicable, details of automation tools used in the process.                                    | 6                               |
| Effect measures               | 12     | Specify for each outcome the effect measure(s) (e.g. risk ratio, mean difference) used in the synthesis or presentation of results.                                                                                                                                                                  | 6                               |
| Synthesis methods             | 13a    | Describe the processes used to decide which studies were eligible for each synthesis (e.g. tabulating the study intervention characteristics and comparing against the planned groups for each synthesis (item #5)).                                                                                 | 6                               |
|                               | 13b    | Describe any methods required to prepare the data for presentation or synthesis, such as handling of missing summary statistics, or data conversions.                                                                                                                                                | 6                               |
|                               | 13c    | Describe any methods used to tabulate or visually display results of individual studies and syntheses.                                                                                                                                                                                               | 6                               |
|                               | 13d    | Describe any methods used to synthesize results and provide a rationale for the choice(s). If meta-analysis was performed, describe the model(s), method(s) to identify the presence and extent of statistical heterogeneity, and software package(s) used.                                          | 6                               |
|                               | 13e    | Describe any methods used to explore possible causes of heterogeneity among study results (e.g. subgroup analysis, meta-regression).                                                                                                                                                                 | 6                               |
|                               | 13f    | Describe any sensitivity analyses conducted to assess robustness of the synthesized results.                                                                                                                                                                                                         | 6                               |
| Reporting bias assessment     | 14     | Describe any methods used to assess risk of bias due to missing results in a synthesis (arising from reporting biases).                                                                                                                                                                              | 6                               |
| Certainty                     | 15     | Describe any methods used to assess certainty (or confidence) in the body of evidence for an outcome.                                                                                                                                                                                                | 6                               |



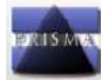

## PRISMA 2020 Checklist

| Section and Topic                              | Item # | Checklist item                                                                                                                                                                                                                                                                       | Location where item is reported |
|------------------------------------------------|--------|--------------------------------------------------------------------------------------------------------------------------------------------------------------------------------------------------------------------------------------------------------------------------------------|---------------------------------|
| assessment                                     |        |                                                                                                                                                                                                                                                                                      |                                 |
| <b>RESULTS</b>                                 |        |                                                                                                                                                                                                                                                                                      |                                 |
| Study selection                                | 16a    | Describe the results of the search and selection process, from the number of records identified in the search to the number of studies included in the review, ideally using a flow diagram.                                                                                         | 7                               |
|                                                | 16b    | Cite studies that might appear to meet the inclusion criteria, but which were excluded, and explain why they were excluded.                                                                                                                                                          | 7                               |
| Study characteristics                          | 17     | Cite each included study and present its characteristics.                                                                                                                                                                                                                            | 7                               |
| Risk of bias in studies                        | 18     | Present assessments of risk of bias for each included study.                                                                                                                                                                                                                         | 7                               |
| Results of individual studies                  | 19     | For all outcomes, present, for each study: (a) summary statistics for each group (where appropriate) and (b) an effect estimate and its precision (e.g. confidence/credible interval), ideally using structured tables or plots.                                                     | 7-9                             |
| Results of syntheses                           | 20a    | For each synthesis, briefly summarise the characteristics and risk of bias among contributing studies.                                                                                                                                                                               | 7-9 & 14                        |
|                                                | 20b    | Present results of all statistical syntheses conducted. If meta-analysis was done, present for each the summary estimate and its precision (e.g. confidence/credible interval) and measures of statistical heterogeneity. If comparing groups, describe the direction of the effect. | 7-9 & 14                        |
|                                                | 20c    | Present results of all investigations of possible causes of heterogeneity among study results.                                                                                                                                                                                       | 7-9 & 14                        |
|                                                | 20d    | Present results of all sensitivity analyses conducted to assess the robustness of the synthesized results.                                                                                                                                                                           | 7-9 & 14                        |
| Reporting biases                               | 21     | Present assessments of risk of bias due to missing results (arising from reporting biases) for each synthesis assessed.                                                                                                                                                              | 7-9                             |
| Certainty of evidence                          | 22     | Present assessments of certainty (or confidence) in the body of evidence for each outcome assessed.                                                                                                                                                                                  | 7-9                             |
| <b>DISCUSSION</b>                              |        |                                                                                                                                                                                                                                                                                      |                                 |
| Discussion                                     | 23a    | Provide a general interpretation of the results in the context of other evidence.                                                                                                                                                                                                    | 11-13                           |
|                                                | 23b    | Discuss any limitations of the evidence included in the review.                                                                                                                                                                                                                      | 11-13                           |
|                                                | 23c    | Discuss any limitations of the review processes used.                                                                                                                                                                                                                                | 13                              |
|                                                | 23d    | Discuss implications of the results for practice, policy, and future research.                                                                                                                                                                                                       | 11-13                           |
| <b>OTHER INFORMATION</b>                       |        |                                                                                                                                                                                                                                                                                      |                                 |
| Registration and protocol                      | 24a    | Provide registration information for the review, including register name and registration number, or state that the review was not registered.                                                                                                                                       | 5                               |
|                                                | 24b    | Indicate where the review protocol can be accessed, or state that a protocol was not prepared.                                                                                                                                                                                       | 5                               |
|                                                | 24c    | Describe and explain any amendments to information provided at registration or in the protocol.                                                                                                                                                                                      | 5                               |
| Support                                        | 25     | Describe sources of financial or non-financial support for the review, and the role of the funders or sponsors in the review.                                                                                                                                                        | 14                              |
| Competing interests                            | 26     | Declare any competing interests of review authors.                                                                                                                                                                                                                                   | 14                              |
| Availability of data, code and other materials | 27     | Report which of the following are publicly available and where they can be found: template data collection forms; data extracted from included studies; data used for all analyses; analytic code; any other materials used in the review.                                           | 14                              |



## PRISMA 2020 Checklist

- 1
- 2
- 3
- 4
- 5
- 6
- 7
- 8
- 9
- 10
- 11
- 12
- 13
- 14
- 15
- 16
- 17
- 18
- 19
- 20
- 21
- 22
- 23
- 24
- 25
- 26
- 27
- 28
- 29
- 30
- 31
- 32
- 33
- 34
- 35
- 36
- 37
- 38
- 39
- 40
- 41
- 42
- 43
- 44
- 45
- 46
- 47

10.1136/bmj.n71

For more information, visit: <http://www.prisma-statement.org/>

For peer review only

# BMJ Open

## Prevalence and determinants of pregnancy termination in Ethiopia: A systematic review and meta-analysis

|                                 |                                                                                                                                                                                                                                                  |
|---------------------------------|--------------------------------------------------------------------------------------------------------------------------------------------------------------------------------------------------------------------------------------------------|
| Journal:                        | <i>BMJ Open</i>                                                                                                                                                                                                                                  |
| Manuscript ID                   | bmjopen-2023-073799.R3                                                                                                                                                                                                                           |
| Article Type:                   | Original research                                                                                                                                                                                                                                |
| Date Submitted by the Author:   | 28-Dec-2023                                                                                                                                                                                                                                      |
| Complete List of Authors:       | Kumsa, Henok; Woldia University<br>Misl, Esuyawkal; Woldia University, Midwifery<br>Arage, Mulugeta; Woldia University, Midwifery<br>Kidie, Atitegeb; Woldia University<br>Hailu, Tilahun; Woldia University<br>tenaw, lebeza; Woldia University |
| <b>Primary Subject Heading</b>: | Obstetrics and gynaecology                                                                                                                                                                                                                       |
| Secondary Subject Heading:      | Sexual health, Reproductive medicine, Public health                                                                                                                                                                                              |
| Keywords:                       | Adolescent, Public health < INFECTIOUS DISEASES, Sexual and Gender Minorities                                                                                                                                                                    |
|                                 |                                                                                                                                                                                                                                                  |

SCHOLARONE™  
Manuscripts

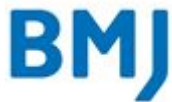

I, the Submitting Author has the right to grant and does grant on behalf of all authors of the Work (as defined in the below author licence), an exclusive licence and/or a non-exclusive licence for contributions from authors who are: i) UK Crown employees; ii) where BMJ has agreed a CC-BY licence shall apply, and/or iii) in accordance with the terms applicable for US Federal Government officers or employees acting as part of their official duties; on a worldwide, perpetual, irrevocable, royalty-free basis to BMJ Publishing Group Ltd ("BMJ") its licensees and where the relevant Journal is co-owned by BMJ to the co-owners of the Journal, to publish the Work in this journal and any other BMJ products and to exploit all rights, as set out in our [licence](#).

The Submitting Author accepts and understands that any supply made under these terms is made by BMJ to the Submitting Author unless you are acting as an employee on behalf of your employer or a postgraduate student of an affiliated institution which is paying any applicable article publishing charge ("APC") for Open Access articles. Where the Submitting Author wishes to make the Work available on an Open Access basis (and intends to pay the relevant APC), the terms of reuse of such Open Access shall be governed by a Creative Commons licence – details of these licences and which [Creative Commons](#) licence will apply to this Work are set out in our licence referred to above.

Other than as permitted in any relevant BMJ Author's Self Archiving Policies, I confirm this Work has not been accepted for publication elsewhere, is not being considered for publication elsewhere and does not duplicate material already published. I confirm all authors consent to publication of this Work and authorise the granting of this licence.

1  
2  
3 **Prevalence and determinants of pregnancy termination in Ethiopia: A systematic review**  
4 **and meta-analysis**  
5

6 Henok Kumsa<sup>1</sup>, Esuyawkal Mislul<sup>1</sup>, Mulugeta Wodaje Arage<sup>1</sup>, Atitegeb Abera<sup>2</sup>, Tilahun Hailu<sup>2</sup>,  
7 and Lebeza Alemu Tenaw<sup>2</sup>  
8  
9

10  
11 *Affiliations* invaluable  
12

13  
14 <sup>1</sup>School of Midwifery, College of Health Science, Woldia University, Ethiopia  
15

16 <sup>2</sup> School of Public health, College of Health Science, Woldia University, Ethiopia  
17

18  
19 Email Address

20 HK: [henokkumsa@gmail.com](mailto:henokkumsa@gmail.com)

21 EM: [esuyawkalmislul@gmail.com](mailto:esuyawkalmislul@gmail.com)

22 MWA: [mulewodaje@gmail.com](mailto:mulewodaje@gmail.com)

23 AA: [atitegebabera@gmail.com](mailto:atitegebabera@gmail.com)

24 TH: [lemaryam01@gmail.com](mailto:lemaryam01@gmail.com)

25  
26  
27  
28  
29  
30  
31  
32  
33  
34  
35  
36  
37  
38  
39  
40  
41  
42  
43  
44  
45  
46  
47  
48  
49  
50  
51  
52  
53  
54  
55  
56  
57  
58  
59  
60  
LAT: [lebezaa@gmail.com](mailto:lebezaa@gmail.com)

\*Corresponding author: Lebeza Alemu Tenaw

Email: [lebezaa@gmail.com](mailto:lebezaa@gmail.com)

## Abstract

**Objective:** This review aims to determine the prevalence of pregnancy termination and its determinant factors in Ethiopia.

**Design:** Systematic review and meta-analysis

**Data sources:** Relevant articles were retrieved from databases such as PubMed, EMBASE, Medline, and other search engines.

**Eligibility criteria for selecting studies:** The research design for this study had no restrictions, allowing for the inclusion of cross-sectional and case-control studies that examined the prevalence or determinants of pregnancy termination. However, case reports, case series, reviews, editorials, and studies published as abstracts only were excluded from the analysis.

**Data extraction and synthesis:** The review precisely in accordance with PRISMA criteria, and the quality of the review was assessed using the Joanna Briggs Institute critical appraisal checklist. Heterogeneity was indicated by the p-value for  $I^2$  statistics less than 0.05. Data were entered into Microsoft Excel, and the analysis was conducted using Stata 16.

**Results:** The pooled prevalence pregnancy termination in Ethiopia was 21.52% (95% CI: 15.01, 28.03). Women who had their first sexual initiation before the age of 18 (OR = 1.78; 95% CI = 1.13, 2.82, P=0.144), had irregular menstrual bleeding (OR = 1.86; 95% CI = 1.25, 2.77, P=0.756), being a student (OR: 4.85; 95% CI: 1.98, 11.91, P=0.201), and had multiple sexual partners (OR: 4.88; 95% CI: 3.43, 6.93, P=0.329) were significantly associated with pregnancy termination.

**Conclusions:** One in five women terminated their pregnancies, which is higher than in other Sub-Saharan countries. Being a student, irregular menstrual bleeding, early initiation of sexual intercourse, and multiple sexual partners were determinants of pregnancy termination. Special attention is needed in avoiding early sexual initiation and in reducing sexual risk behaviors.

### Strength and limitation

- Comprehensive inclusion of studies from various regions provides a broader perspective.
- Variations in study population, setting, and design may impact the results.
- Exclusion of qualitative studies on pregnancy termination explanations limits the overall understanding.

**Keywords:** Pregnancy termination, Determinants, Systematic review and meta analysis, Ethiopia

## Introduction

Pregnancy termination is a sensitive and contentious issue with religious, moral, cultural, and political dimensions. Also, it presents a significant public health concern in developing countries (1). Above 60% of unintended pregnancies result in pregnancy termination, with the majority of those being unsafe (2). Developing countries bear the burden of 97% of all unsafe abortions which contributes to 220 deaths per 100,000 live births (3).

Pregnancy termination imposes an additional burden on health institutions and individuals; in developing countries alone, each year an estimated 7 million women seek treatment in health facilities for the complication of pregnancy termination (4). It is estimated that health-care systems will spend \$553 million per year on post-abortion complications and will lose \$922 million in income due to long-term disability caused by unsafe termination (5). Additionally, a woman who undergo pregnancy termination, particularly through methods such as mechanical dilation and curettage, face an increased a risk of experiencing preterm birth and repeated pregnancy loss (6).

Though the burden of pregnancy termination in Ethiopia is a significant contributor to maternal mortality and morbidity (7). Previous studies conducted in Ethiopia have shown that the prevalence of pregnancy termination and its negative consequences are increasing over time (8, 9), and repeated pregnancy termination also accounts significant amount (10-12). Several variables, including early age marriage, low level of education, early sexual intercourse initiation, violence/rape, emotional well-being, educational status, employment status, and resources, and sexual intercourse relationship, have been implicated as factors of pregnancy termination in studies conducted across Ethiopia (13-16).

However, at the national level, illustrative evidence is lacking in Ethiopia regarding the level and underlying factors of pregnancy termination. Thus, this systematic review and meta-analysis aimed to assess the prevalence of pregnancy termination and its determinant factors in Ethiopia. The findings of this study provide evidence for intervention to reduce the burden of pregnancy termination, its complications, and its economic impact in the country. Additionally, this study will help to design strategies and monitor the progress of programs aimed at achieving the maternal mortality reduction targets of the sustainable development goals.

## Methods

### Study design and setting

This systematic review and meta-analysis included cross sectional, and case control studies which has been conducted in Ethiopia. Systematic review and meta-analysis using computerized databases; searches were performed to estimate the prevalence and identify the determinants of pregnancy termination in Ethiopia.

### Search strategy

For this review, a comprehensive search was conducted using various searching strategies to identify relevant articles. Published articles were searched in well-known online databases including EMBASE, Medline, Google, PubMed, Google Scholar, African Journal Online, and Science Direct databases. Additionally, the search was expanded by examining the reference lists of eligible articles to retrieve and extract potential articles. This systematic review was conducted using the preferred reporting items for systematic Reviews and Meta-Analyses PRISMA guidelines. Similarly, the quality of our systematic review and meta-analysis was assessed using the Joanna Briggs Institute (JBI) critical appraisal checklist (17).

Searching was done by using Medical Subject Heading (MeSH) terms related with determinants of pregnancy termination. MeSH terms enables us to select related research articles. We conducted the search for terms using Boolean operators "AND" and "OR," both separately and in combinations. We used the search terms “(((((((Abortion) OR (termination of pregnancy)) OR (miscarriage)) AND (determinant factors)) OR (determinants)) OR (associated factors)) OR (influencing factors)) AND (Amhara) OR (Oromia) OR (Tigray) OR (Southern nation, nationalities and people’s) OR (Afar) OR (Benshagul gumuz) OR (Gamabella) OR (Somali) OR (Dire dawa) OR (Addis Ababa) OR (Hareri) OR (Ethiopia)”.

### Eligibility criteria

#### Inclusion criteria

There were no restrictions on research design. We included cross-sectional and case-control studies that showed the prevalence of or determinants of pregnancy termination. Additionally, Only articles reported in the English language and conducted studies until February 2023 were included.



### Exclusion criteria

Case reports, case series, reviews, editorials, and studies published as abstracts only were excluded. Agreements on the inclusion and exclusion of the articles were held through the participation of all authors.

### Quality assessment and data extraction

Articles were screened using their titles, abstracts, and full paper reviews before being included in the meta-analysis. The quality of included studies was evaluated using the JBI critical appraisal checklist (17). The quality scores of included studies were assessed and presented using the mean scores to designate them as high or low quality. The JBI tool for prevalence and determinat studies was used as a guideline for data extraction from the final selected articles. Moreover, all authors independently reviewed the titles and abstracts of studies to be included in this systematic review and meta-analysis. Agreements on the inclusion and exclusion of the articles were reached with the participation of all authors. The extraction sheet contains name of authors, study year, publication year, region of study, study design, sample size, prevalence in percentage or proportion, odd ratio of factors, confidence intervals both the upper and lower bound of each corresponding odds ratio. The odd ratio of each factors are transformed as log (OR). The lower and upper confidence intervals are log transformed as log (upper confidence interval), and log (lower confidence interval). The standard error for the proportion was also created as:  $\text{Standard error} = \sqrt{\frac{p(1-p)}{n}}$ . Then the standard error of the confidence intervals were also estimated using the log transformed upper and lower limits which is calculated as  $\text{SE} = (\log\text{UCL} - \log\text{LCL})/3.92$ . Finally for pooled prevalence estimation, the proportion and its corresponding standard errors were used. For factors, the log transformed odd ratios and the standard error of their corresponding confidence intervals were used to estimate the effect sizes.

### Measurement of the outcome variable

In this study, termination of pregnancy is the removal of pregnancy tissue, conception products, or fetus, and placenta from the uterus. The term 'fetus' and 'placenta' is commonly used after eight weeks of pregnancy. Pregnancy tissue and products of conception are the tissues that are

1  
2  
3 produced by the union of an egg and sperm before eight weeks. Terminating a pregnancy is a  
4 deliberate action taken by a health professional or the woman herself (18).  
5  
6

### 7 **Registration and protocol**

8  
9  
10 This review has not previously registered or prepared a protocol. As a result, no adjustments  
11 have been made.  
12  
13

14 **Patient and Public Involvement:** not applicable  
15

### 16 **Statistical methods and analysis**

17  
18 The meta-analysis was conducted using Stata 16 software after entering data into Microsoft  
19 Excel. Forest plots were used to demonstrate the prevalence of pregnancy termination in Ethiopia.  
20 The random effect model of analysis was utilized as a method of meta-analysis to minimize the  
21 heterogeneity of included studies (19). The study setting, population, and study period were  
22 used to conduct sub-group analysis. The presentation of pregnancy termination determinants was  
23 based on odds ratios (ORs) with a 95% confidence interval(CI).  
24  
25  
26  
27  
28  
29

30  
31 The heterogeneity of the studies included was assessed using the  $I^2$  statistics. The presence of  
32 heterogeneity was determined by using p-value for  $I^2$  statistics that was less than 0.05. Based on  
33 the  $I^2$  test statistics results, the heterogeneity is categorized as low (25%), moderate (50%), and  
34 high (75%) (19). Furthermore, the Egger regression asymmetry test was used to evaluate the  
35 publication bias (20, 21). When the Egger test result's P-value is less than 0.05, there is a  
36 declaration of publication bias. As well, the Duval and Tweedie nonparametric trim and fill  
37 analysis using the random effect analysis was conducted to detect the presence of publication  
38 bias (22).  
39  
40  
41  
42  
43  
44  
45  
46  
47  
48  
49  
50  
51  
52  
53  
54  
55  
56  
57  
58  
59  
60

## Result

### Study selection

This systematic review and meta-analysis included published studies on the termination of pregnancy in Ethiopia. A total of 12,242 records were retrieved through electronic database searching, and only 33 articles were included in the final analysis (supplementary figure 1).

### Characteristics of included studies

This review included Thirty-three studies conducted in various regions of Ethiopia. Of all the studies, 8 (24.24%) were from the Amhara Region (11, 12, 15, 16, 23-26), South Nations and Nationalities Peoples accounted for 9 (27.27%) of the total (13, 27-34), 1 was from Oromia (35), 5 (15.15%) from Addis Ababa city administration (10, 14, 36-38), 3 (9.09%) were from Harari region (39-41), 3 (9.09%) were from Tigray region (42-44), 1 (3.03%) was from Afar region (45), 3 (9.09) were from National data (46-48). Twenty-eight (84.85%) of the included articles were cross-sectional studies (10-13, 15, 23-31, 33-35, 37-42, 44-48), and remains five (15.15%) were case-control studies(14, 16, 32, 36, 43).

As well, twenty-seven of the studies were institution-based (10-16, 24, 27-33, 35-46), while six were community-based studies(23, 25, 26, 34, 47, 48). The sample size of the included studies ranged from a minimum of 124 in a study conducted in southwest Ethiopia (34) and to a maximum of 12,378 in a study conducted using DHS data (48). Overall, a total of 40,116 study participants were included in this review detail is available in supplementary table 1.

### Prevalence of pregnancy termination in Ethiopia

Based on the random effect model, the overall pooled prevalence of termination of pregnancy among women in Ethiopia was 21.52% (95% CI: 15.01–28.03) (supplementary figure 2). The meta-analysis included studies with significant heterogeneity:  $I^2$  value of 99.8%,  $p < 0.000$ . Publication biases among the included studies were examined using funnel plots and Egger's regression test. The results of funnel plots showed an asymmetric shape, which indicates the presence of publication bias among included studies. Additionally, the Duval and Tweedie nonparametric trim and fill analysis was applied to correct publication bias among the studies, but no trimming was performed since the data is unchanged (supplementary figures 3 and 4).

1  
2  
3  
4  
5  
6  
7 Objective assessments of publication bias by Egger's regression test also showed the presence of  
8 publication bias across studies (P-value < 0.001). After conducting the trim and fill analysis to  
9 address publication bias, the final pooled prevalence of pregnancy termination in Ethiopia was  
10 adjusted to 21.52% (95% CI: 15.01–28.03).  
11  
12

### 13 14 **Subgroup analysis** 15

16  
17 We performed subgroup analysis based on the region, study population, and study setting of the  
18 included studies. Table 1 shows the pooled prevalence was highest, 35.60% (95% CI: 28.86,  
19 42.34) in the Oromia region, followed by 34.17% (95% CI: 17.67, 86.01) in the Tigray region,  
20 24.63% (95% CI: 10.52, 37.75) in the South Nation and Nationalities People Region, and the  
21 lowest was seen in three studies conducted using demographic health data, 12.10% (95% CI:  
22 5.66, 18.50) (supplementary figure 5).  
23  
24  
25  
26  
27

28  
29 Furthermore, subgroup analysis reveals that the highest pooled prevalence of abortion was seen  
30 among gynecological admitted patients, at 60.60% (95% CI: 59.47, 61.73), followed by 25.38%  
31 (95% CI: 9.39, 41.32) among university/college students, and 27.90% (95% CI: 20.01, 35.79)  
32 among insecurely housed women, with the lowest pooled prevalence being seen among pregnant  
33 and youth women (supplementary figure 6). Additionally, subgroup analysis was conducted  
34 based on the year before and after the Millennium Development Goals' implementation. The  
35 pooled prevalence of pregnancy termination before and after MDGs was 20.55% (95% CI:  
36 16.10–24.99) and 21.61% (95% CI: 15.01–28.03), respectively (supplementary figure 7).  
37  
38  
39  
40  
41  
42  
43  
44  
45  
46  
47  
48  
49  
50  
51  
52  
53  
54  
55  
56  
57  
58  
59  
60

Table 1: Subgroup analysis for the prevalence of pregnancy termination in Ethiopia, 2004-2022

| Subgroup                      | Number of studies | Total Sample | Prevalence (95%CI)          | Heterogeneity  |                   |
|-------------------------------|-------------------|--------------|-----------------------------|----------------|-------------------|
|                               |                   |              |                             | I <sup>2</sup> | p-value           |
| <b>By region</b>              |                   |              |                             |                |                   |
| Addis Ababa                   | 2                 | 855          | 25.49(10.39, 40.09)         | 92.4           | < 0.001           |
| Amhara                        | 6                 | 2371         | 18.06(6.27, 29.85)          | 99.0           | < 0.001           |
| SNNP                          | 8                 | 3678         | 24.63(95% CI: 10.52, 37.75) | 99.4           | < 0.001           |
| National Data                 | 3                 | 19854        | 12.10(5.70, 18.50)          | 99.7           | < 0.001           |
| Tigray                        | 2                 | 7463         | 34.17(17.6, 86.01)          | 99.9           | < 0.001           |
| Harari                        | 2                 | 1835         | 16.13(12.21, 20.05)         | 81.2           | < 0.001           |
| Oromia                        | 1                 | 194          | 35.60(28.86, 42.34)         | .              | .                 |
| Afar                          | 1                 | 509          | 8.80(6.34, 11.26)           | .              | .                 |
| <b>By publication year</b>    |                   |              |                             |                |                   |
| 2016 to 2022 (post MDG)       | 15                | 24234        | 20.55(16.10, 24.99)         | 99.3           | < 0.001           |
| Before MDG                    | 10                | 12525        | 22.61(4.55, 40.66)          | 99.9           | < 0.001           |
| <b>Study population</b>       |                   |              |                             |                |                   |
| Reproductive age              | 8                 | 4426         | 17.03(8.55, 25.52)          | 99.0           | < 0.001           |
| Pregnant women                | 1                 | 12378        | 8.90 (8.40, 9.40)           | .              | .                 |
| Abortion care seeker          | 7                 | 2990         | 21.19(14.65, 27.72)         | 95.3           | < 0.001           |
| University or college student | 6                 | 3237         | 25.36 (9.39, 41.32)         | 99.5           | < 0.001           |
| Gynecological patient         | 1                 | 7203         | 60.60 (59.47, 61.73)        | .              | .                 |
| Youth women                   | 1                 | 6401         | 2.50 (2.12, 2.88)           | .              | .                 |
| Insecurely housed women       | 1                 | 124          | 27.90 (20.01, 35.79)        | .              | .                 |
| <b>Total</b>                  | <b>25</b>         | <b>36759</b> | <b>21.52(15.01, 28.03)</b>  | <b>99.8</b>    | <b>&lt; 0.001</b> |

Insecurely household women: it means women who live or spend their time on the street.

## **Determinants of pregnancy termination**

### **Socio-demographic characteristics**

The sociodemographic factors included in this analysis were the place of residence, age, marital, occupational, and educational status of the women. A separate analysis was conducted for each variable. Finally, a meta-analysis of (16, 39) two studies showed that being a student was significantly associated with pregnancy termination (OR: 4.85; 95% CI: 1.98, 11.91). There was moderate heterogeneity ( $I^2 = 39\%$ ) (supplementary figures 8 and 9).

### **Reproductive characteristics**

A total of 5 articles (15, 24, 28, 43, 47) were included to assess the association between first sexual initiation before the age of 18 and pregnancy termination. The pooled meta-analysis found that women who had their first sexual experience before the age of 18 were twice as likely as those who had their first sexual experience after the age of 18 to have their pregnancy terminated (OR = 1.78; 95% CI = 1.13, 2.82). There was moderate heterogeneity ( $I^2 = 41.6\%$ ). Moreover, two articles (11, 43) were also included to determine the association between irregular menstrual bleeding and pregnancy termination. The final pooled meta-analysis using data from the two articles found that pregnancy termination was nearly two times more likely to occur in women with irregular menstrual bleeding than in those who had regular menstrual bleeding, (OR = 1.86; 95% CI = 1.25, 2.77). Similarly, a meta-analysis of six studies(14, 15, 24, 32, 34, 43) showed that women who had multiple sexual partners were significantly associated with pregnancy termination (OR: 4.88; 95% CI: 3.43, 6.93). There was low heterogeneity ( $I^2 = 13.4\%$ ) (supplementary figures 10).

## Discussion

Pregnancy termination is a major public health concern in Ethiopia (49). In this systematic review and meta-analysis, the overall magnitude of pregnancy termination was pooled from 25 published articles in Ethiopia, and significant determinants of pregnancy termination were identified using different articles. Being a student increased the rate of termination of pregnancy nearly five times. In addition, first sexual initiation before the age of 18, women with irregular menstrual bleeding, and multiple sexual partners were determinants of pregnancy termination in Ethiopia. The findings of this review revealed evidence to help reduce the impact of pregnancy termination in Ethiopia by aiming at the main determinants.

In Ethiopia various studies have been conducted on the issue of pregnancy termination, involving different settings such as the community, healthcare institutions, and higher education institutions. These studies have yielded varying figures regarding the prevalence of pregnancy termination. However, this particular study revealed Ethiopia has a higher prevalence of pregnancy termination compared to other low- and middle-income countries.

The study found that the pooled prevalence of termination of pregnancy in Ethiopia was 21.52%. This finding is lower compared to a study done in Ghana at 25% (50), higher than in Mozambique at 9 % ( $\times 2.33$ ) (50), and in India at 1.7% ( $\times 12$ ) (51). The difference could be attributed to various factors like; study population, study design, study area, socio-demographic characteristics, and the differences in health policies of the countries. Additionally, the current study utilized a meta-analysis approach at the national level, incorporating community or institutional studies, while the study in Ghana and Mozambique was conducted using demographic health data with a small sample size compared to the current study (50). Moreover, in our study, huge variations were seen across the regions. A spatial analysis study conducted in Ethiopia using national data also showed variation within the regions (48). Thus, acting according to the needs of the region and age-specific policy is important during national policy or guideline development.

Our study observed that being a student was significantly associated with the termination of pregnancy. One of the possible explanations could be that students are likely to be adolescents,

1  
2  
3 belonging to the younger age category. In addition, adolescent girls are remaining in school  
4 longer, which may factor into their decisions to postpone childbearing and terminate unintended  
5 pregnancies (52). Likewise, a study conducted in India shows the tendency for pregnancy  
6 termination is high in this age category since the rate of unintended pregnancies and unmet needs  
7 for family planning are high in this age group (53). The higher rate of pregnancy termination  
8 could also be attributed to a failure to provide education on prevention for unintended pregnancy  
9 and complications of pregnancy termination (54).

15  
16 Additionally, the idea supported by Van Rensburg that societal poverty, unemployment, and  
17 other socio-demographic factors affect youth pregnancies and it might prone to pregnancy  
18 termination (55). In addition, a review from the late 1990s found that young women often cited a  
19 desire to stay in school as a major reason for pregnancy termination (56). Moreover, many  
20 adolescents continue to have difficulty accessing contraception, often as a result of stigma and/or  
21 a lack of resources (57).

26  
27 The study from Nigeria indicated that 15–24-year old women are still being left behind on  
28 reproductive health matters despite increasing global attention to prioritizing their health (58).  
29 Studies found that educational programs aimed at reducing sexual risk behaviors and preventing  
30 pregnancy among young people can effectively reduce pregnancy rate among teenagers (59).  
31 Also, programs aimed at abstinence-centered education are effective in preventing adolescent  
32 pregnancy (60). Thus, this implies a future focus on reproductive health issues specific to  
33 students to address their needs. Additionally, future researchers should better focus on possible  
34 interventions to reduce the risk of pregnancy and pregnancy termination among students.

41  
42 Women under the age of 18 at first sexual initiation were significantly more likely to terminate  
43 their pregnancy. This finding is consistent with studies conducted in Nigeria and Peru that  
44 reported a higher rate of pregnancy termination among women who had their age at first sex  
45 before 18 years old (61-63). Studies also revealed that early sexual debuts are significantly  
46 associated with adolescent pregnancies, which are usually unwanted (64, 65). As well, a study  
47 conducted in Ethiopia shown initiation of sexual intercourse before the age of 18 years was  
48 found significant association with repeated pregnancy termination (66).



1  
2  
3 In many low income countries, rising ages at first marriage combined with increasing levels of  
4 premarital sex continue to result in unintended pregnancies among adolescents (67). Therefore,  
5 improving the knowledge of adolescents about sexual and reproductive health issues, and  
6 increasing contraceptive access and use among young people, are important to prevent unsafe  
7 abortion or pregnancy termination (68). This necessitates the development of reproductive health  
8 education specifically for adolescent girls. Future researchers should also address the gap in  
9 studies on the needs of adolescent girls and possible interventions needed to reduce sexual  
10 initiation before the age of 18 years.  
11

12  
13 Furthermore, at the individual level, we found that pregnancy termination was significantly  
14 associated with women who had multiple sexual partners. Likewise, a study conducted in Peru  
15 indicated that as the number of sexual partners increased, the odds of getting a pregnancy  
16 termination increased (69). Studies conducted in Cambodia, China, and the United Kingdom also  
17 have found that having multiple sexual partners is associated with a higher rate of repeated  
18 pregnancy termination. (54, 70, 71). The government shall be emphasized reproductive health  
19 education, particularly for women regarding the risks of multiple sexual partners, the access  
20 where, and how to get counseling on how to prevent pregnancy.  
21

22  
23 This study also found that pregnancy termination was two times higher among women who had  
24 menstrual irregularities compared to their counterparts. Lastly, this systematic review and meta-  
25 analysis indicated that there were no statistical association between the termination of pregnancy  
26 and rural residents, marital status, women's age, educational status, primiparous, history of  
27 abortion, and wanted pregnancy.  
28

29  
30 Our study has several strengths. The comprehensive inclusion of studies from various regions in  
31 Ethiopia provides a broader perspective. The rigorous methodology employed in the selection  
32 and analysis of studies further strengthens the credibility of the results. As a limitation, this  
33 finding might be prone to the risk of bias due to the significant heterogeneity of articles included  
34 from a different region of Ethiopia. In addition, differences in the study population, setting, and  
35 design within the included studies might influence the results of this review. Studies conducted  
36 in health institutions, higher education might affect the pooled estimates. Furthermore, it is  
37  
38  
39  
40  
41  
42  
43  
44  
45  
46  
47  
48  
49  
50  
51  
52  
53  
54  
55  
56  
57  
58  
59  
60

1  
2  
3 important to note that the review exclusively included published articles and did not incorporate  
4 qualitative studies that explore the explanations for pregnancy termination.  
5  
6

7  
8 Future research must explain the relationship between pregnancy termination and other  
9 determinants such as social, economic, substance use, peer pressure, alcohol use, sexual or  
10 physical violence, and knowledge of sexual and reproductive health issues such as family  
11 planning and fertility.  
12  
13  
14

## 15 16 **Conclusions**

17  
18 One in every five women had their pregnancies terminated, which is a high rate when compared  
19 to Sub-Saharan countries. Being a student was significantly associated with the termination of a  
20 pregnancy. In addition, irregular menstrual bleeding, early initiation of sexual intercourse, and  
21 multiple sexual partners were important determinants of pregnancy termination.  
22  
23  
24  
25

## 26 27 **Abbreviations**

28  
29 OR: odds ratios; CI: confidence interval; JBI: Joanna Briggs Institute; MDG: Millennium  
30 Development Goals'  
31  
32  
33

## 34 35 **Declarations**

36  
37 **Ethical approval:** This article was conducted using published articles. Therefore, it don't  
38 required ethical approval.  
39  
40

41  
42 **Funding:** No funding was used in this study.  
43

44  
45 **Availability of data and materials:** The datasets used and analyzed during the review are  
46 available from the corresponding author upon reasonable request.  
47  
48

49  
50 **Competing interests:** None declared.

51  
52 **Author contributions:** HK, MWA, AB, EM, TH, and LAT conducted the data curation and  
53 extraction. HK, LAT, EM, and MWA. wrote the original and final draft of the research. LAT, EM,  
54  
55  
56  
57

1  
2  
3 MWA and HK were conducted formal analyses and data interpretation. All authors read and  
4 approved the final manuscript.  
5  
6

### 7 **Supplementary file**

8  
9 The supplementary file contains the data extraction sheet for the study included in the review as  
10 supplementary table 1 and supplementary figures 1-10.  
11  
12  
13  
14  
15  
16  
17  
18  
19  
20  
21  
22  
23  
24  
25  
26  
27  
28  
29  
30  
31  
32  
33  
34  
35  
36  
37  
38  
39  
40  
41  
42  
43  
44  
45  
46  
47  
48  
49  
50  
51  
52  
53  
54  
55  
56  
57  
58  
59  
60

For peer review only

## References

1. Mescé D, Clifto D. Abortion facts and figures; population reference bureau. Geneva: WHO. 2011.
2. Bearak J, Popinchalk A, Ganatra B, Moller A-B, Tunçalp Ö, Beavin C, et al. Unintended pregnancy and abortion by income, region, and the legal status of abortion: estimates from a comprehensive model for 1990–2019. *The Lancet Global Health*. 2020;8(9):e1152-e61.
3. Ganatra B, Gerdtz C, Rossier C, Johnson Jr BR, Tunçalp Ö, Assifi A, et al. Global, regional, and subregional classification of abortions by safety, 2010–14: estimates from a Bayesian hierarchical model. *The Lancet*. 2017;390(10110):2372-81.
4. Singh S, Maddow-Zimet I. Facility-based treatment for medical complications resulting from unsafe pregnancy termination in the developing world, 2012: a review of evidence from 26 countries. *BJOG: An International Journal of Obstetrics & Gynaecology*. 2016;123(9):1489-98.
5. Vlassoff M, Shearer J, Walker D, Lucas H. Economic impact of unsafe abortion-related morbidity and mortality: evidence and estimation challenges: Institute of Development Studies Brighton, UK; 2008.
6. DeCherney AH NL, Laufer N, Roman AS. Contraception and family, gynecology. *pcdatioa*, 2007. teUSTM-HC.
7. Ababa A. Federal democratic republic of Ethiopia ministry of health. Ethiopia: Postnatal Care. 2003.
8. Gebrehiwot Y, Fetters T, Gebreselassie H, Moore A, Hailemariam M, Dibaba Y, et al. Changes in Morbidity and Abortion Care in Ethiopia After Legal Reform: National Results from 2008 and 2014. *Int Perspect Sex Reprod Health*. 2016;42(3):121-30.
9. Singh S, Fetters T, Gebreselassie H, Abdella A, Gebrehiwot Y, Kumbi S, et al. The estimated incidence of induced abortion in Ethiopia, 2008. *International perspectives on sexual and reproductive health*. 2010:16-25.
10. Alemayehu B, Addissie A, Ayele W, Tiroro S, Woldeyohannes D. Magnitude and associated factors of repeat induced abortion among reproductive age group women who seeks abortion Care Services at Marie Stopes International Ethiopia Clinics in Addis Ababa, Ethiopia. *Reproductive health*. 2019;16(1):1-10.
11. Mulat A, Bayu H, Mellie H, Alemu A. Induced second trimester abortion and associated factors in Amhara region referral hospitals. *BioMed research international*. 2015;2015:256534.
12. Tesfaye B, Tewabe M, Ferede A, Dawson A. Induced second trimester abortion and associated factors at debre Markos referral hospital: cross-sectional study. *Women's Health*. 2020;16:1745506520929546.
13. Tesfaye G, Hambisa MT, Semahegn A. Induced abortion and associated factors in health facilities of Guraghe zone, southern Ethiopia. *Journal of pregnancy*. 2014;2014.
14. Denberu B, Alemseged F, Segni H. Determinants of abortion among youth seeking reproductive health Care in Selected Health Facilities, in Addis Ababa, Ethiopia. *Global Journal of Reproductive Medicine*. 2017;1(2):27-38.
15. Behulu GK, Fenta EA, Aynalem GL. Repeat induced abortion and associated factors among reproductive age women who seek abortion services in Debre Berhan town health institutions, Central Ethiopia, 2019. *BMC research notes*. 2019;12(1):1-5.
16. Tilahun F, Dadi AF, Shiferaw G. Determinants of abortion among clients coming for abortion service at felegehiwot referral hospital, northwest Ethiopia: a case control study. *Contraception and reproductive medicine*. 2017;2(1):1-6.

17. Aromataris E, Munn Z. Joanna Briggs Institute reviewer's manual. The Joanna Briggs Institute. 2017;2018.
18. 2014 KAAOBAftooARA.
19. Higgins JP, Thompson SG, Deeks JJ, Altman DG. Measuring inconsistency in meta-analyses. *Bmj*. 2003;327(7414):557-60.
20. Begg CB, Mazumdar M. Operating characteristics of a rank correlation test for publication bias. *Biometrics*. 1994:1088-101.
21. Egger M, Smith GD, Schneider M, Minder C. Bias in meta-analysis detected by a simple, graphical test. *Bmj*. 1997;315(7109):629-34.
22. Duval S, Tweedie R. A nonparametric "trim and fill" method of accounting for publication bias in meta-analysis. *Journal of the american statistical association*. 2000;95(449):89-98.
23. Ayenew G, Gedefaw M, Berhe R, Nigusie A. Current Status, and Correlates of Abortion among Rural Women of Gonji Kollala District, Northwest Ethiopia. *Open Journal of Epidemiology*. 2015;5:136-46.
24. Waktola MI, Mekonen DG, Nigussie TS, Cherkose EA, Abate AT. Repeat induced abortion and associated factors among women seeking abortion care services at Debre Markos town health institutions, Amhara regional state, Ethiopia, 2017. *BMC Res Notes*. 2020;13(1):44-.
25. Mariam T, Melkamu S, Yetwale F, Abdela M, Getnet M. Prevalence and Associated Factors of Unsafe Abortion among Women of Reproductive Age Group in Gondar Town, Northwest Ethiopia, 2017: A Community-based Cross-sectional Study. *Journal of Advances in Medicine and Medical Research*. 2018;28:1-7.
26. Getahun H, Berhane Y. Abortion among rural women in north Ethiopia. *International Journal of Gynecology & Obstetrics*. 2000;71(3):265-6.
27. Animaw W, Bogale B. Abortion in university and college female students of Arba Minch town, Ethiopia, 2011. *Sexual & Reproductive Healthcare*. 2014;5(1):17-22.
28. Beyene BB, Meshesha B. Magnitude And Associated Factors Of Induced Abortion Among Regular Undergraduate Students Of Dilla University. *International journal of scientific and research publications*. 2020;10:10032.
29. Sahile A, Shiferaw M. Magnitude of Induced Abortion and Associated Factors among Female Students of Hawassa University, Southern Region, Ethiopia, 2019. *Journal of pregnancy*. 2020;2020:1-6.
30. Gelaye AA, Taye KN, Mekonen T. Magnitude and risk factors of abortion among regular female students in Wolaita Sodo University, Ethiopia. *BMC Women's Health*. 2014;14(1):50.
31. Nigussie T, Feyisa M, Yosef T, Berhanu M, Asefa A. Prevalence of induced abortion and its associated factors among female students of health science in South West Ethiopia. *The Open Nursing Journal*. 2020;14(1).
32. Abebe M, Mersha A, Degefa N, Gebremeskel F, Kefelew E, Molla W. Determinants of induced abortion among women received maternal health care services in public hospitals of Arba Minch and Wolayita Sodo town, southern Ethiopia: unmatched case-control study. *BMC women's health*. 2022;22(1):1-12.
33. Lentiro K, Gebru T, Worku A, Asfaw A, Gebremariam T, Tesfaye A. Risk factors of induced abortion among preparatory school student in Guraghe zone, Southern region, Ethiopia: a cross-sectional study. *BMC Women's Health*. 2019;19(1):1-7.
34. Alemu K, Birhanu S, Fekadu L, Endale F, Tamene A, Habte A. Safe abortion service utilization and associated factors among insecurely housed women who experienced abortion in

- 1  
2  
3 southwest Ethiopia, 2021: A community-based cross-sectional study. *Plos one*.  
4 2022;17(8):e0272939.
- 5 35. Gebeyehu D, Admassu B, Sinega M, Haile M. Assessment of Prevalence and Reasons for  
6 Termination of Pregnancy at Jimma University Teaching Hospital, Ethiopia. *Universal Journal*  
7 *of Public Health*. 2015;3:251-5.
- 8 36. Megersa BS, Ojengbede OA, Deckert A, Fawole OI. Factors associated with induced  
9 abortion among women of reproductive age attending selected health facilities in Addis Ababa,  
10 Ethiopia: a case control study. *BMC Women's Health*. 2020;20(1):1-11.
- 11 37. Wassie AY, Lemlem SB, Boka A. Knowledge, Practice and Associated Factors Towards  
12 Medication Abortion Among Reproductive-Age Women in Sexual and Reproductive Health  
13 Clinics of Addis Ababa, Ethiopia, 2018: Cross-Sectional Study. *International Journal of*  
14 *Women's Health*. 2021;13:489.
- 15 38. Bulti F, Gela D, Dinagde N. Knowledge of Safe Abortion Care Services and Associated  
16 Factors Among Women of Reproductive Age Working at Non-Health Sector Public Institutions  
17 in Addis Ababa, Ethiopia. 2021.
- 18 39. Jamie AH, Abdosh MZ. Prevalence of induced abortion and associated factors among  
19 women of reproductive age in Harari region, Ethiopia. *Public Health of Indonesia*. 2020;6(2):35-  
20 40.
- 21 40. Mohammed M, Wesenu M. Prevalence and determinants associated with second  
22 trimester termination of pregnancy in Harari city, Ethiopia; Cross sectional study. 2021.
- 23 41. Worku S, Fantahun M. Unintended pregnancy and induced abortion in a town with  
24 accessible family planning services: the case of Harar in eastern Ethiopia. *Ethiopian Journal of*  
25 *Health Development*. 2006;20(2):79-83.
- 26 42. Abera GB, Berhanu B, Kahsay AB, Gebru HB, Aregay A. Assessment of determinants of  
27 induced abortion among child bearing age women attending maternal and child health clinic in  
28 Mekelle town, Tigray, Ethiopia: a cross sectional study. *International Journal of Pharmaceutical*  
29 *Sciences and Research*. 2012;3(12):4745.
- 30 43. Alemayehu M, Yebyo H, Medhanyie AA, Bayray A, Fantahun M, Goba GK.  
31 Determinants of repeated abortion among women of reproductive age attending health facilities  
32 in Northern Ethiopia: a case-control study. *BMC Public Health*. 2017;17(1):1-8.
- 33 44. Gessesew A. Abortion and unwanted pregnancy in Adigrat zonal hospital, Tigray, north  
34 Ethiopia. *African journal of reproductive health*. 2010;14(3):183-8.
- 35 45. Biza N, Habib Y, Bayray A, Reddy PS. MAGNITUDE AND ASSOCIATED FACTORS  
36 OF ABORTION AMONG REGULAR FEMALE STUDENTS OF SAMARA UNIVERSITY,  
37 AFAR, ETHIOPIA, 2016. *Medico Research Chronicles*. 2018;5(3):191-201.
- 38 46. Mekbib T-A, Hiwot YG, Fantahun M. SURVEY OF UNSAFE ABORTION IN  
39 SELECTED HEALTH FACILITIES IN ETHIOPIA. *Ethiopian Journal of Reproductive Health*.  
40 2007;1(1):11-.
- 41 47. Gilano G, Hailegebreal S. Determinants of abortion among youth 15–24 in Ethiopia: A  
42 multilevel analysis based on EDHS 2016. *PloS one*. 2021;16(3):e0248228.
- 43 48. Tesema GA, Mekonnen TH, Teshale AB. Spatial distribution and determinants of  
44 abortion among reproductive age women in Ethiopia, evidence from Ethiopian Demographic and  
45 Health Survey 2016 data: Spatial and mixed-effect analysis. *PloS one*. 2020;15(6):e0235382.
- 46 49. Abdella A. Maternal mortality trend in Ethiopia. *Ethiopian Journal of Health*  
47 *Development*. 2010;24(1).
- 48  
49  
50  
51  
52  
53  
54  
55  
56  
57  
58  
59  
60

- 1
- 2
- 3
- 4 50. Dickson KS, Adde KS, Ahinkorah BO. Socio-economic determinants of abortion among
- 5 women in Mozambique and Ghana: evidence from demographic and health survey. *Archives of*
- 6 *Public Health*. 2018;76(1):1-10.
- 7 51. Pallikadavath S, Stones RW. Maternal and social factors associated with abortion in India:
- 8 a population-based study. *International Family Planning Perspectives*. 2006:120-5.
- 9 52. Grant MJ, Behrman JR. Gender gaps in educational attainment in less developed
- 10 countries. *Population and development review*. 2010;36(1):71-89.
- 11 53. Jiang L, Hardee K. Women's education, family planning, or both? Application of
- 12 multistate demographic projections in India. *International journal of population research*.
- 13 2014;2014.
- 14 54. Demographic E. Addis Ababa, Ethiopia, and Rockville. Maryland, MA, USA: CSA and
- 15 ICF. 2016.
- 16 55. van Rensburg HC. South Africa's protracted struggle for equal distribution and equitable
- 17 access—still not there. *Human resources for health*. 2014;12(1):1-16.
- 18 56. Bankole A, Singh S, Haas T. Reasons why women have induced abortions: evidence
- 19 from 27 countries. *International family planning perspectives*. 1998:117-52.
- 20 57. Woog V, Susheela S, Alyssa B, Jesse P. Adolescent womens need for and use of sexual
- 21 and reproductive health services in developing countries: Citeseer; 2015.
- 22 58. Onukwugha FI, Magadi MA, Sarki AM, Smith L. Trends in and predictors of pregnancy
- 23 termination among 15–24 year-old women in Nigeria: a multi-level analysis of demographic and
- 24 health surveys 2003–2018. *BMC Pregnancy and Childbirth*. 2020;20(1):550.
- 25 59. Coyle K, Basen-Enquis K, Kirby D, Parcel G, Banspach S, Collins JL, Baumler ER,
- 26 Caravajal S, Harrist, RB. Safer Choices: Long-term impact of a multicomponent school-based
- 27 HIV, STD, and pregnancy prevention program. *Public Health Reports*. 2001;116(Suppl 1):82-93.
- 28 60. Cabezón C, Vigil P, Rojas I, Leiva ME, Riquelme R, Aranda W, et al. Adolescent
- 29 pregnancy prevention: An abstinence-centered randomized controlled intervention in a Chilean
- 30 public high school. *Journal of Adolescent Health*. 2005;36(1):64-9.
- 31 61. Onukwugha FI, Magadi MA, Sarki AM, Smith L. Trends in and predictors of pregnancy
- 32 termination among 15–24 year-old women in Nigeria: a multi-level analysis of demographic and
- 33 health surveys 2003–2018. *BMC pregnancy and childbirth*. 2020;20(1):1-13.
- 34 62. Cadmus E, Owoaje E. Knowledge about complications and practice of abortion among
- 35 female undergraduates in the University of Ibadan, Nigeria. *Annals of Ibadan postgraduate*
- 36 *medicine*. 2011;9(1):19-23.
- 37 63. Ahmed S, Ray R. Determinants of pregnancy and induced and spontaneous abortion in a
- 38 jointly determined framework: evidence from a country-wide, district-level household survey in
- 39 India. *Journal of biosocial science*. 2014;46(4):480-517.
- 40 64. Morhe ES, Tagbor HK, Ankobea FK, Danso KA. Reproductive experiences of teenagers
- 41 in the Ejisu-Juabeng district of Ghana. *International Journal of Gynecology & Obstetrics*.
- 42 2012;118(2):137-40.
- 43 65. Mulugeta Y, Berhane Y. Factors associated with pre-marital sexual debut among
- 44 unmarried high school female students in bahir Dar town, Ethiopia: cross-sectional study.
- 45 *Reproductive health*. 2014;11(1):1-6.
- 46 66. Mekie M, Addisu D, Dagnaw E, Necho W. The level and deriving factors of repeat-
- 47 induced abortion in Ethiopia: A systematic review and meta-analysis. *Heliyon*. 2021;7(1):e05984.
- 48 67. Wellings K, Collumbien M, Slaymaker E, Singh S, Hodges Z, Patel D, et al. Sexual
- 49 behaviour in context: a global perspective. *The Lancet*. 2006;368(9548):1706-28.
- 50
- 51
- 52
- 53
- 54
- 55
- 56
- 57
- 58
- 59
- 60

- 1  
2  
3 68. WHO. Adolescent pregnancy fact sheet: World Health Organization; 2022 [updated 15  
4 September 2022. Available from: [https://www.who.int/en/news-room/fact-](https://www.who.int/en/news-room/fact-sheets/detail/adolescent-pregnancy)  
5 [sheets/detail/adolescent-pregnancy](https://www.who.int/en/news-room/fact-sheets/detail/adolescent-pregnancy).  
6  
7 69. Bernabé-Ortiz A, White PJ, Carcamo CP, Hughes JP, Gonzales MA, Garcia PJ, et al.  
8 Clandestine induced abortion: prevalence, incidence and risk factors among women in a Latin  
9 American country. *Cmaj*. 2009;180(3):298-304.  
10 70. Cheng Y, Wang X, Lv Y, Cai Y, Li Y, Guo X, et al. Study on the risk factors of repeated  
11 abortion among unmarried adolescents. *Zhonghua liu xing bing xue za zhi= Zhonghua*  
12 *liuxingbingxue zazhi*. 2006;27(8):669-72.  
13 71. Yi S, Tuot S, Chhoun P, Pal K, Tith K, Brody C. Factors associated with induced  
14 abortion among female entertainment workers: a cross-sectional study in Cambodia. *BMJ open*.  
15 2015;5(7):e007947.  
16  
17  
18  
19  
20  
21  
22  
23  
24  
25  
26  
27  
28  
29  
30  
31  
32  
33  
34  
35  
36  
37  
38  
39  
40  
41  
42  
43  
44  
45  
46  
47  
48  
49  
50  
51  
52  
53  
54  
55  
56  
57  
58  
59  
60



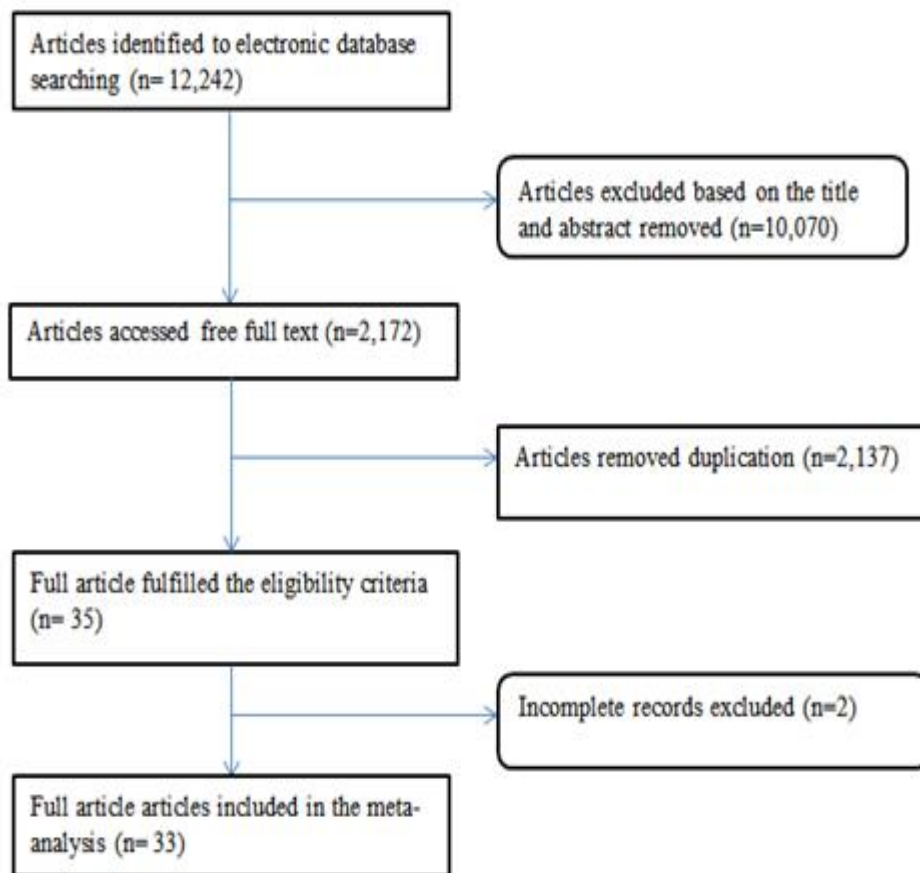

Figure1. Flow chart of describing the selection of studies for the systematic review and meta-analysis of the prevalence of pregnancy termination and associated factors in Ethiopia, 2023

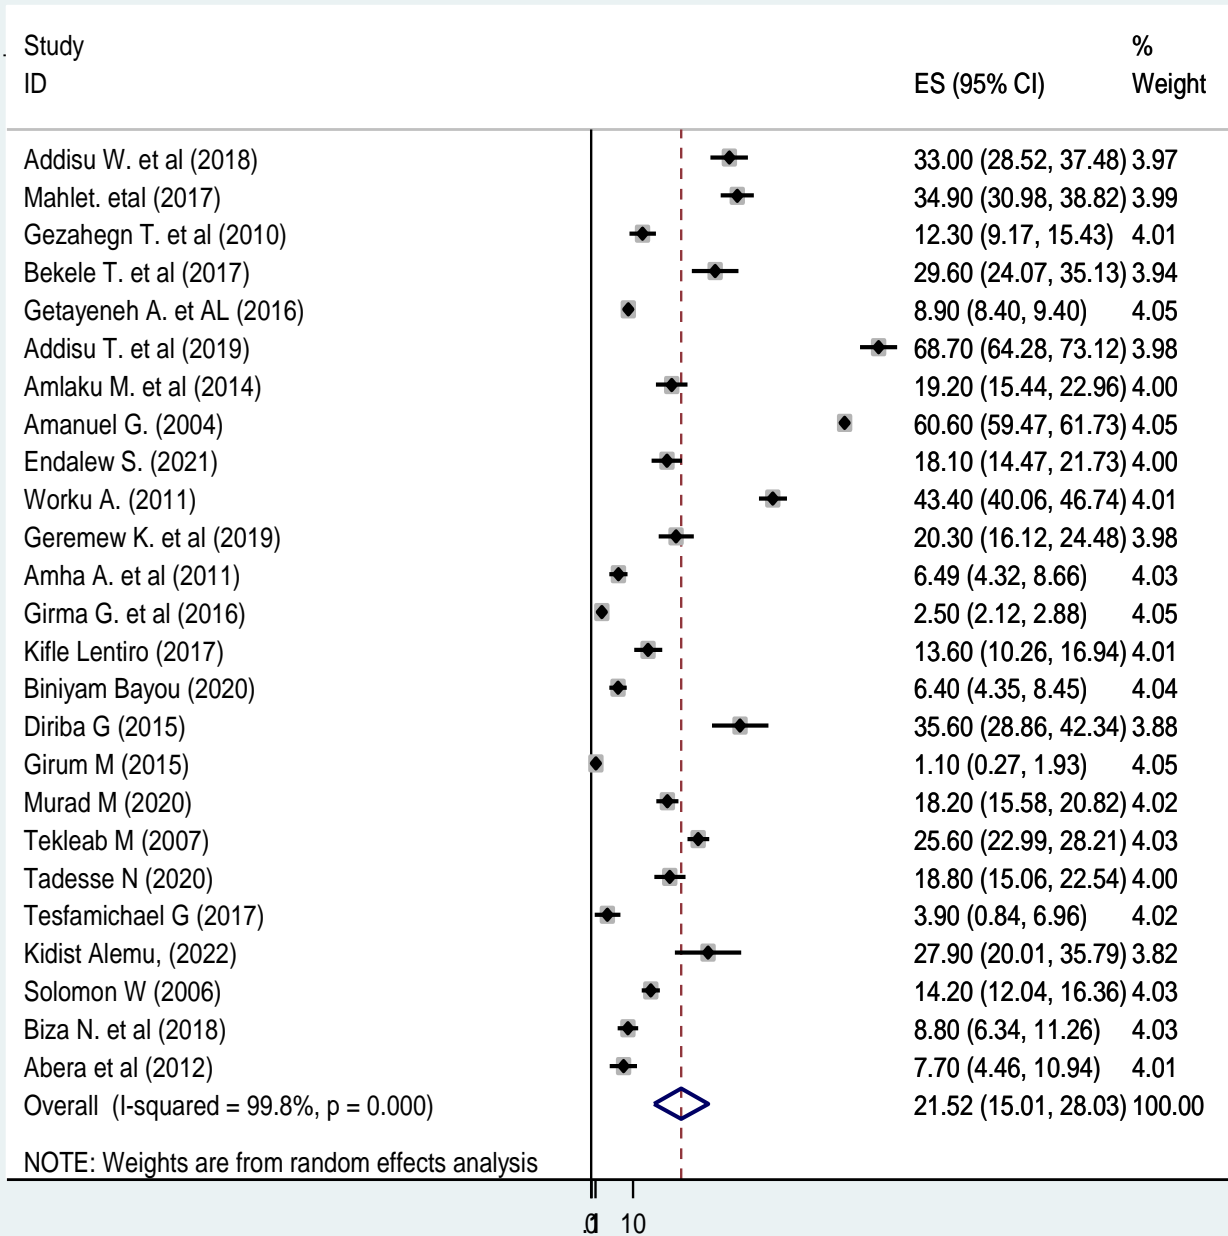

Figure 2: Forest plot of the pooled prevalence of pregnancy termination in Ethiopia, 2023

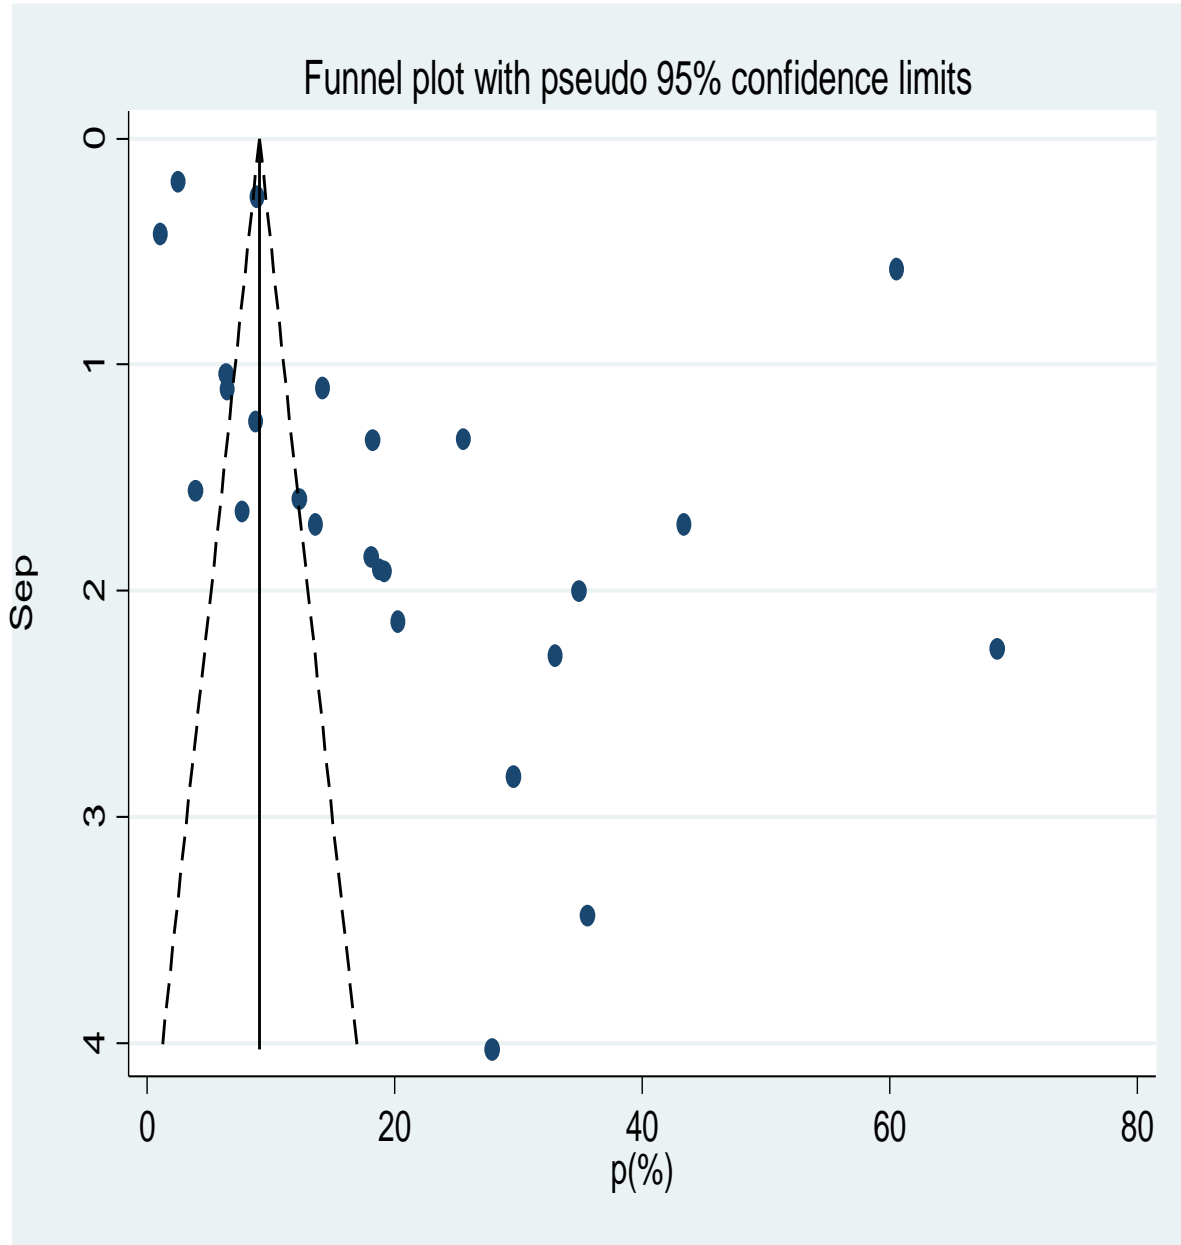

Figure 3: Funnel plot to test publication bias of pregnancy termination in Ethiopia, 2023

1  
2  
3  
4  
5  
6  
7  
8  
9  
10  
11  
12  
13  
14  
15  
16  
17  
18  
19  
20  
21  
22  
23  
24  
25  
26  
27  
28  
29  
30  
31  
32  
33  
34  
35  
36  
37  
38  
39  
40  
41  
42  
43  
44  
45  
46  
47  
48  
49  
50  
51  
52  
53  
54  
55  
56  
57  
58  
59  
60

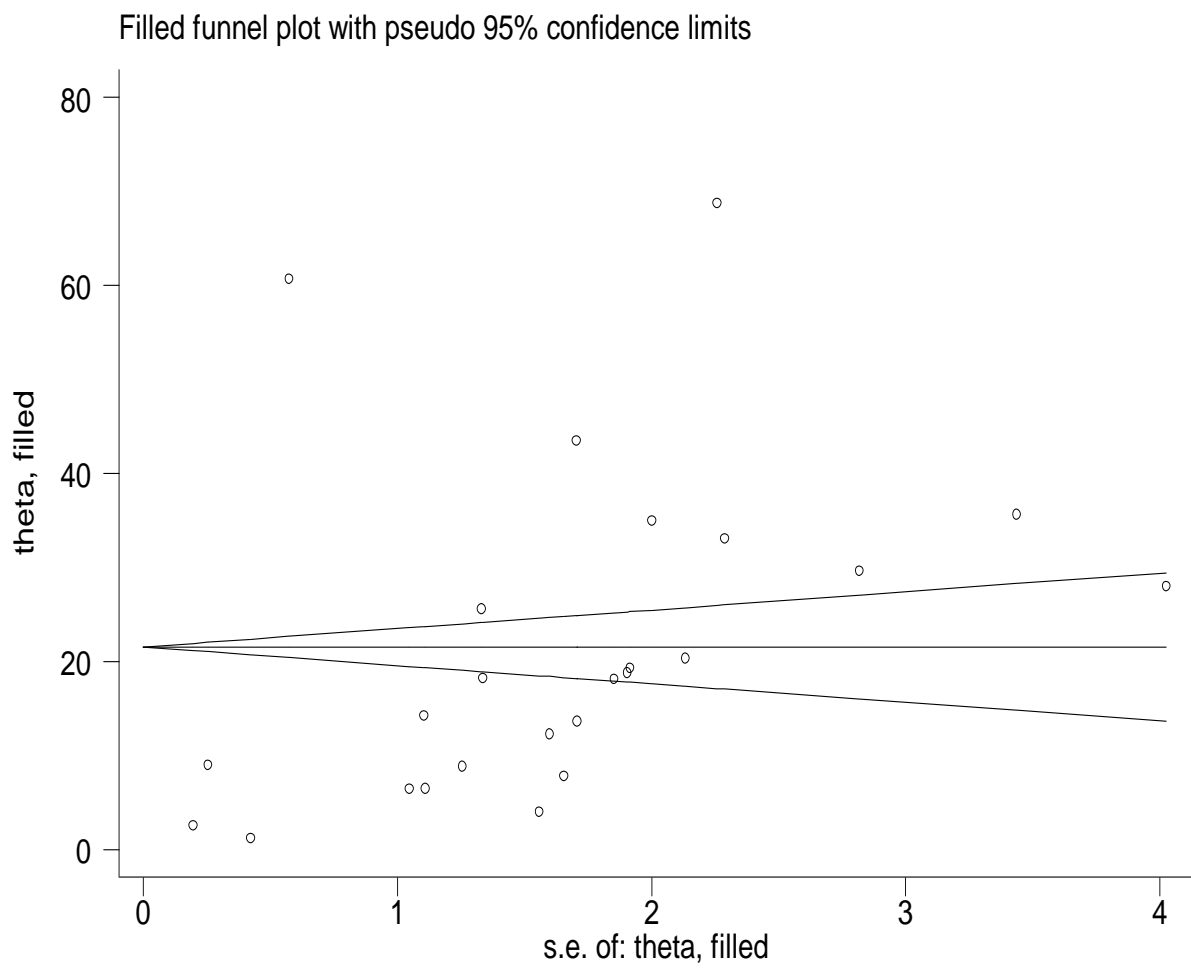

Figure 4: The Duval and Tweedie nonparametric trim and fill analysis of abortion among women in Ethiopia, 2023

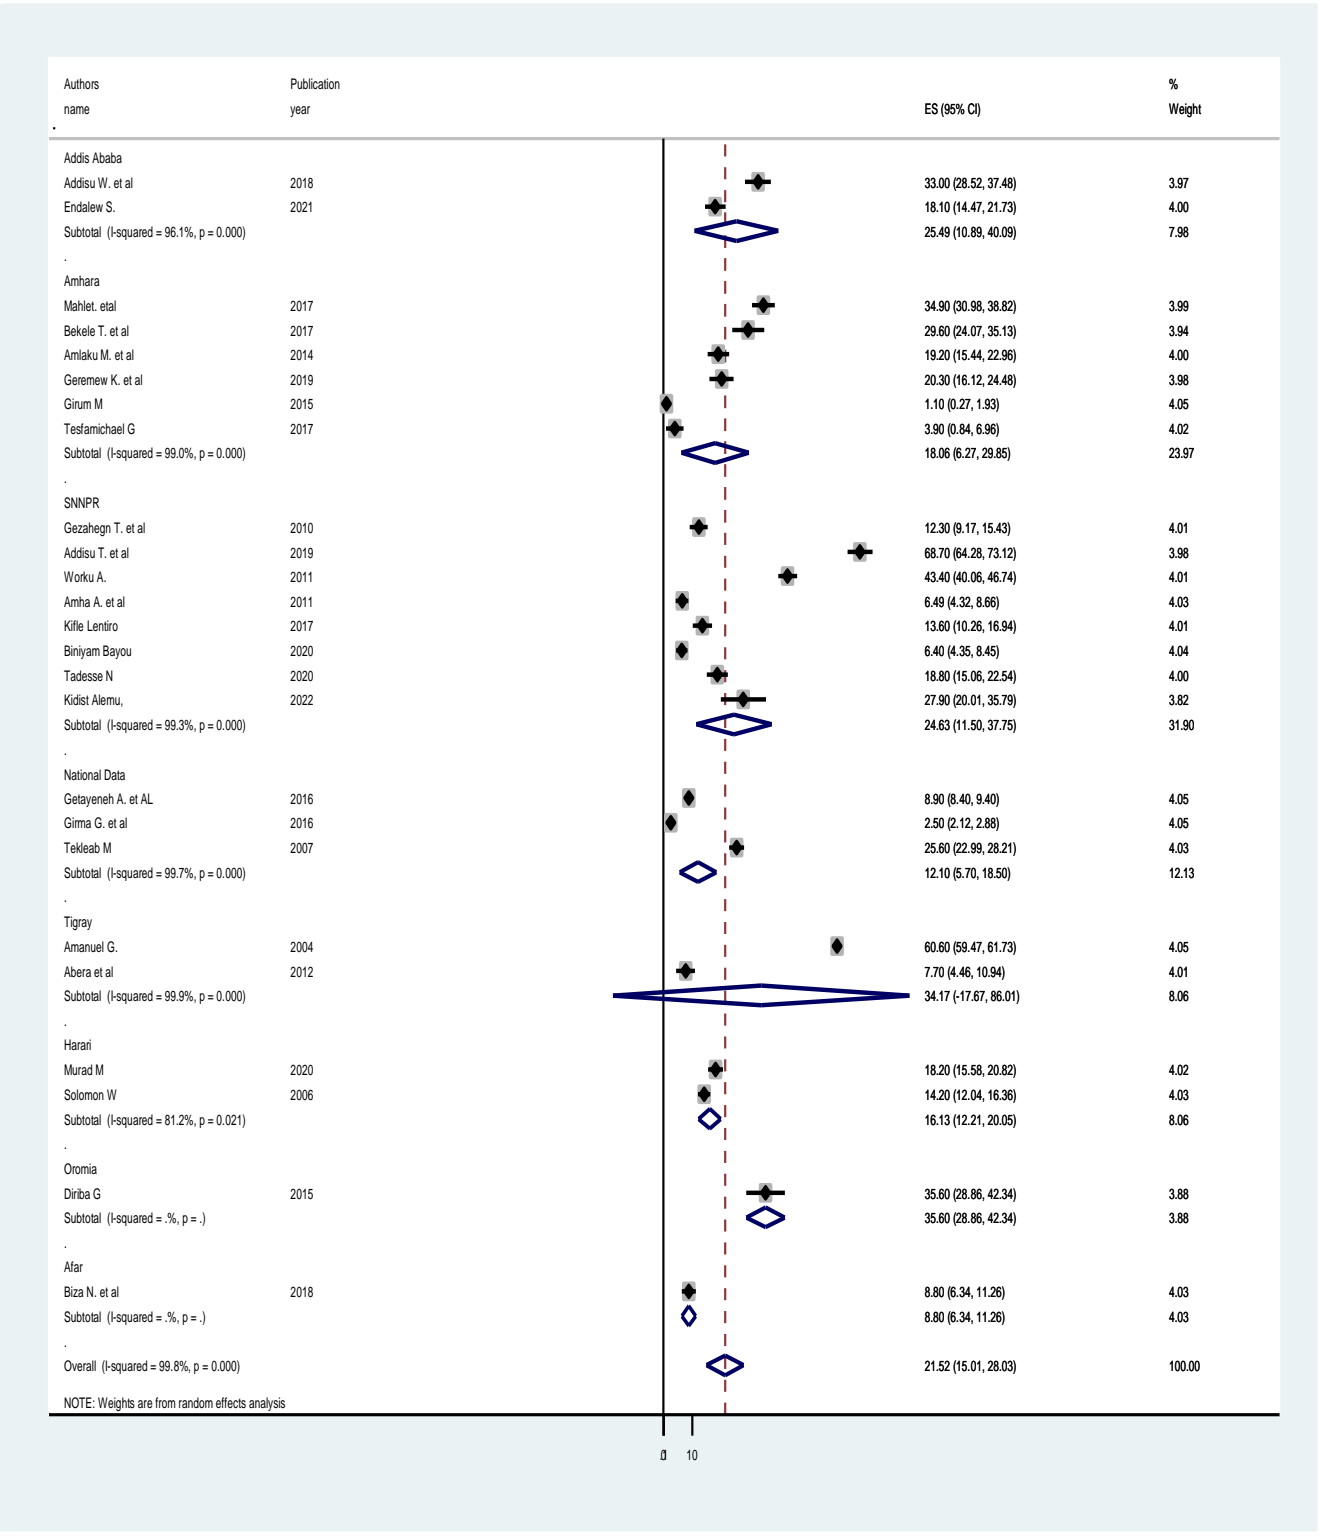

Figure 5: Subgroup analysis of the pregnancy termination based on regional distribution in Ethiopia, 2023

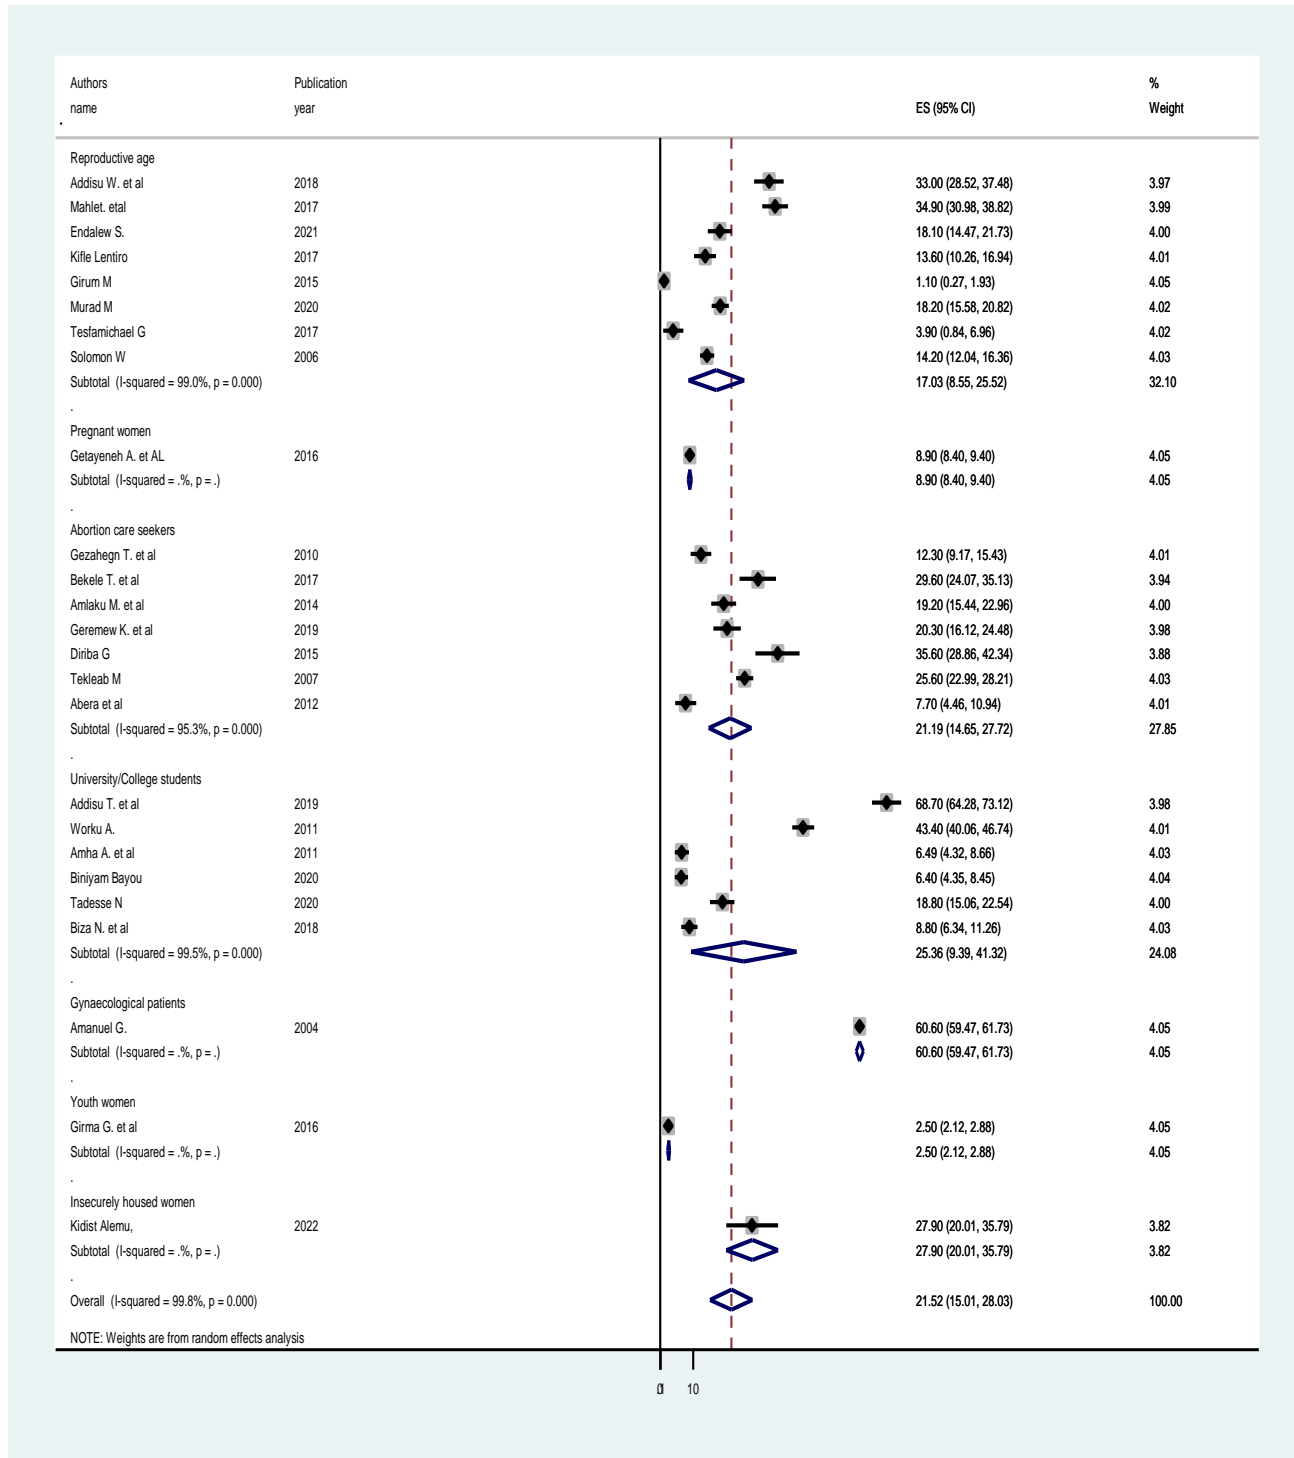

Figure 6: Subgroup analysis of the prevalence of pregnancy termination based on study population in Ethiopia, 2022

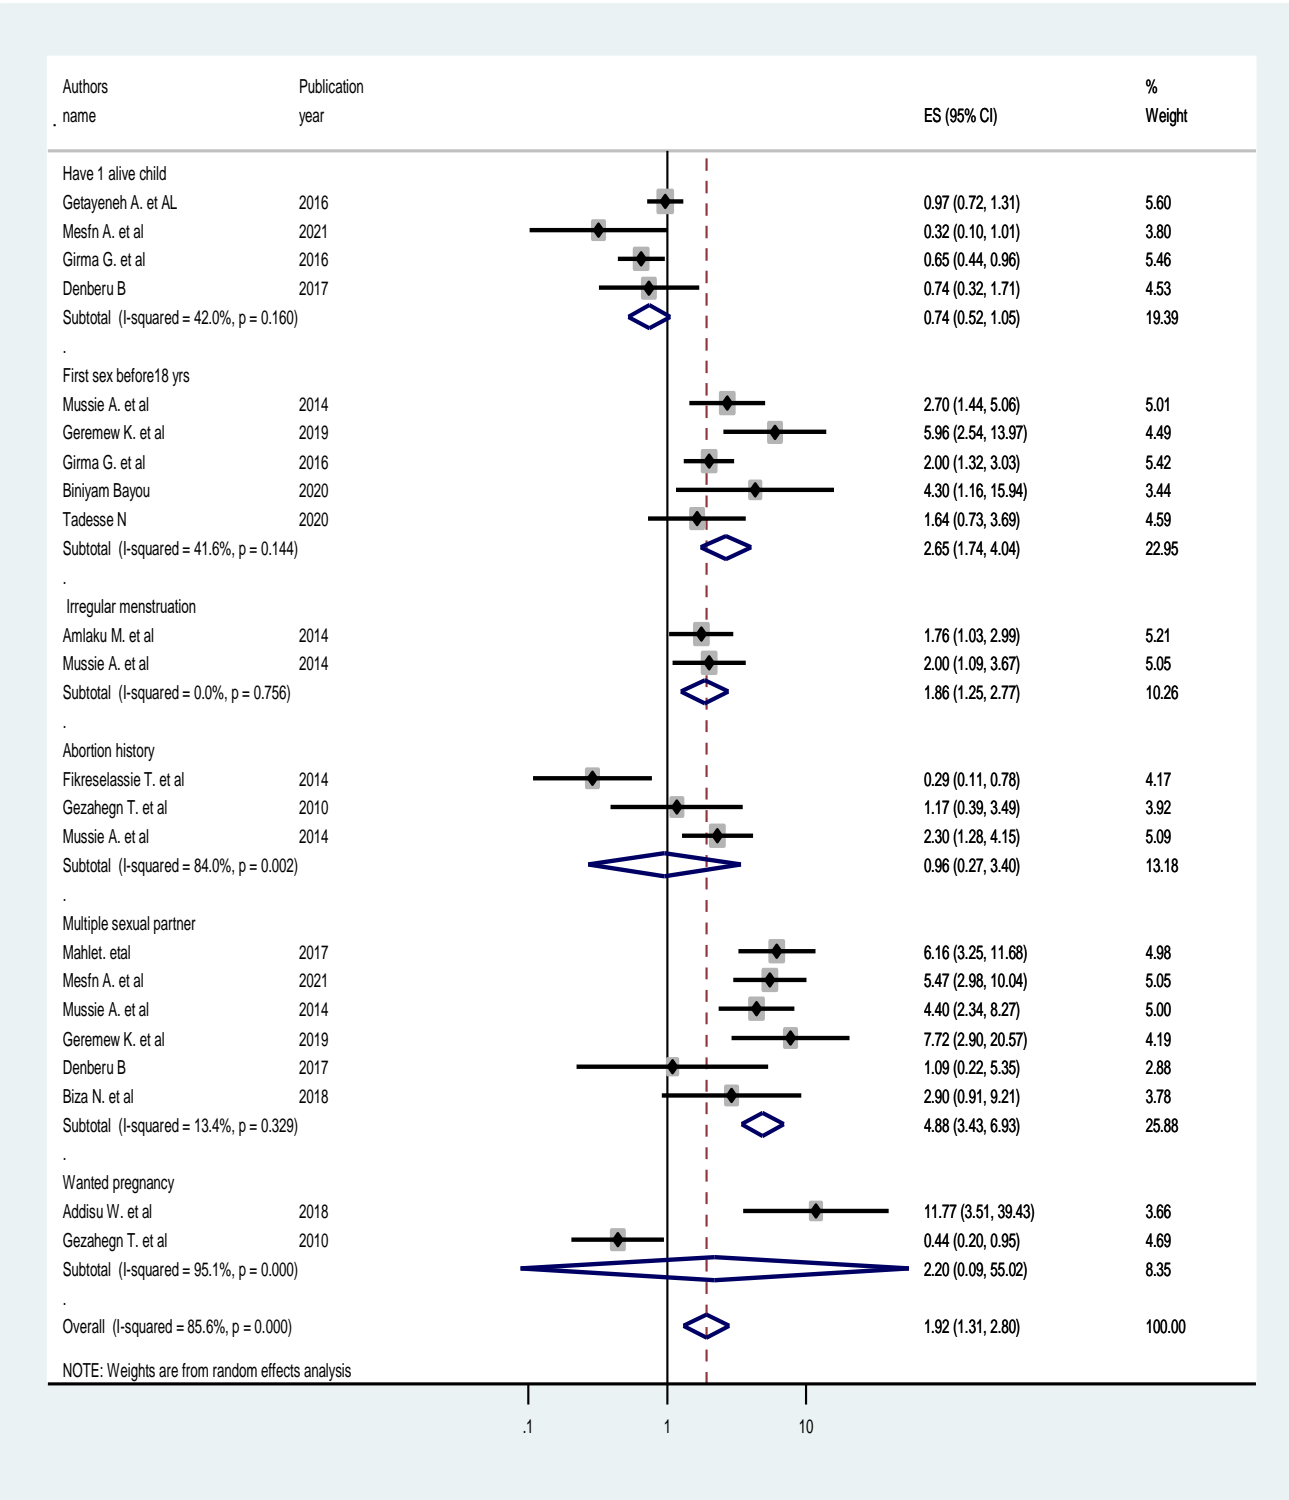

Figure 7: Subgroup analysis of the prevalence of pregnancy termination based on before and after MDG in Ethiopia, 2023

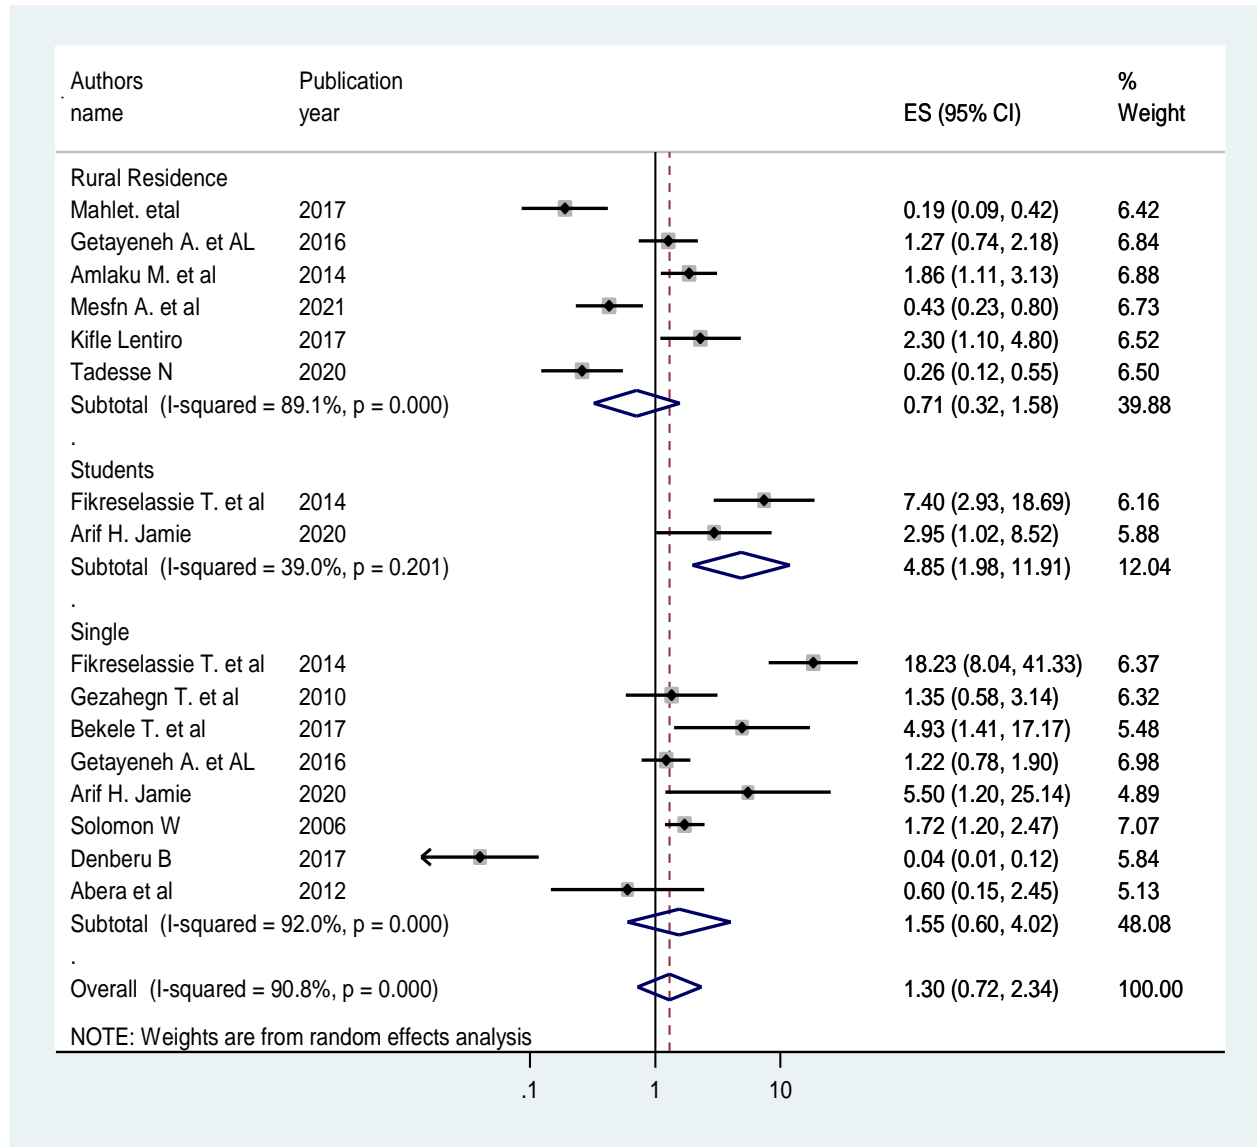

Figure 8: Forest plot of odds ratio for the association of selected socio-demographic characteristics and pregnancy termination in Ethiopia, 2023



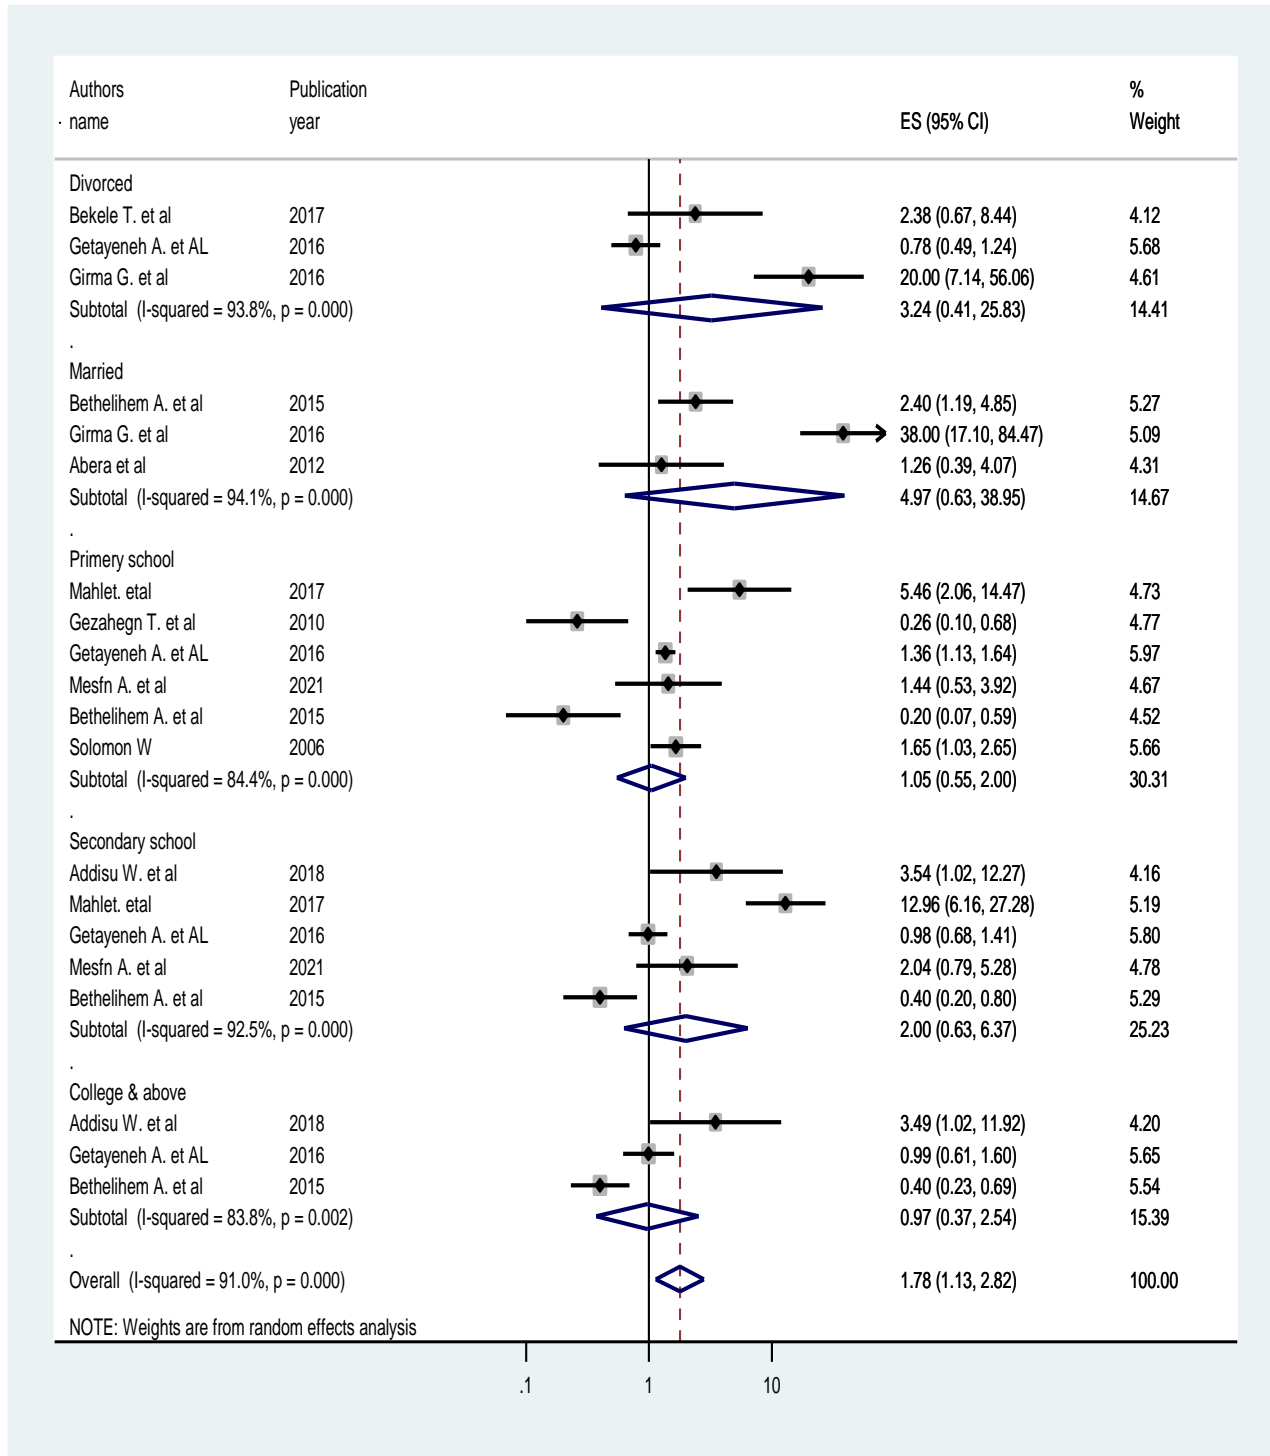

Figure 9: Forest plot of odds ratio for the association of selected socio-demographic characteristics and pregnancy termination in Ethiopia, 2023

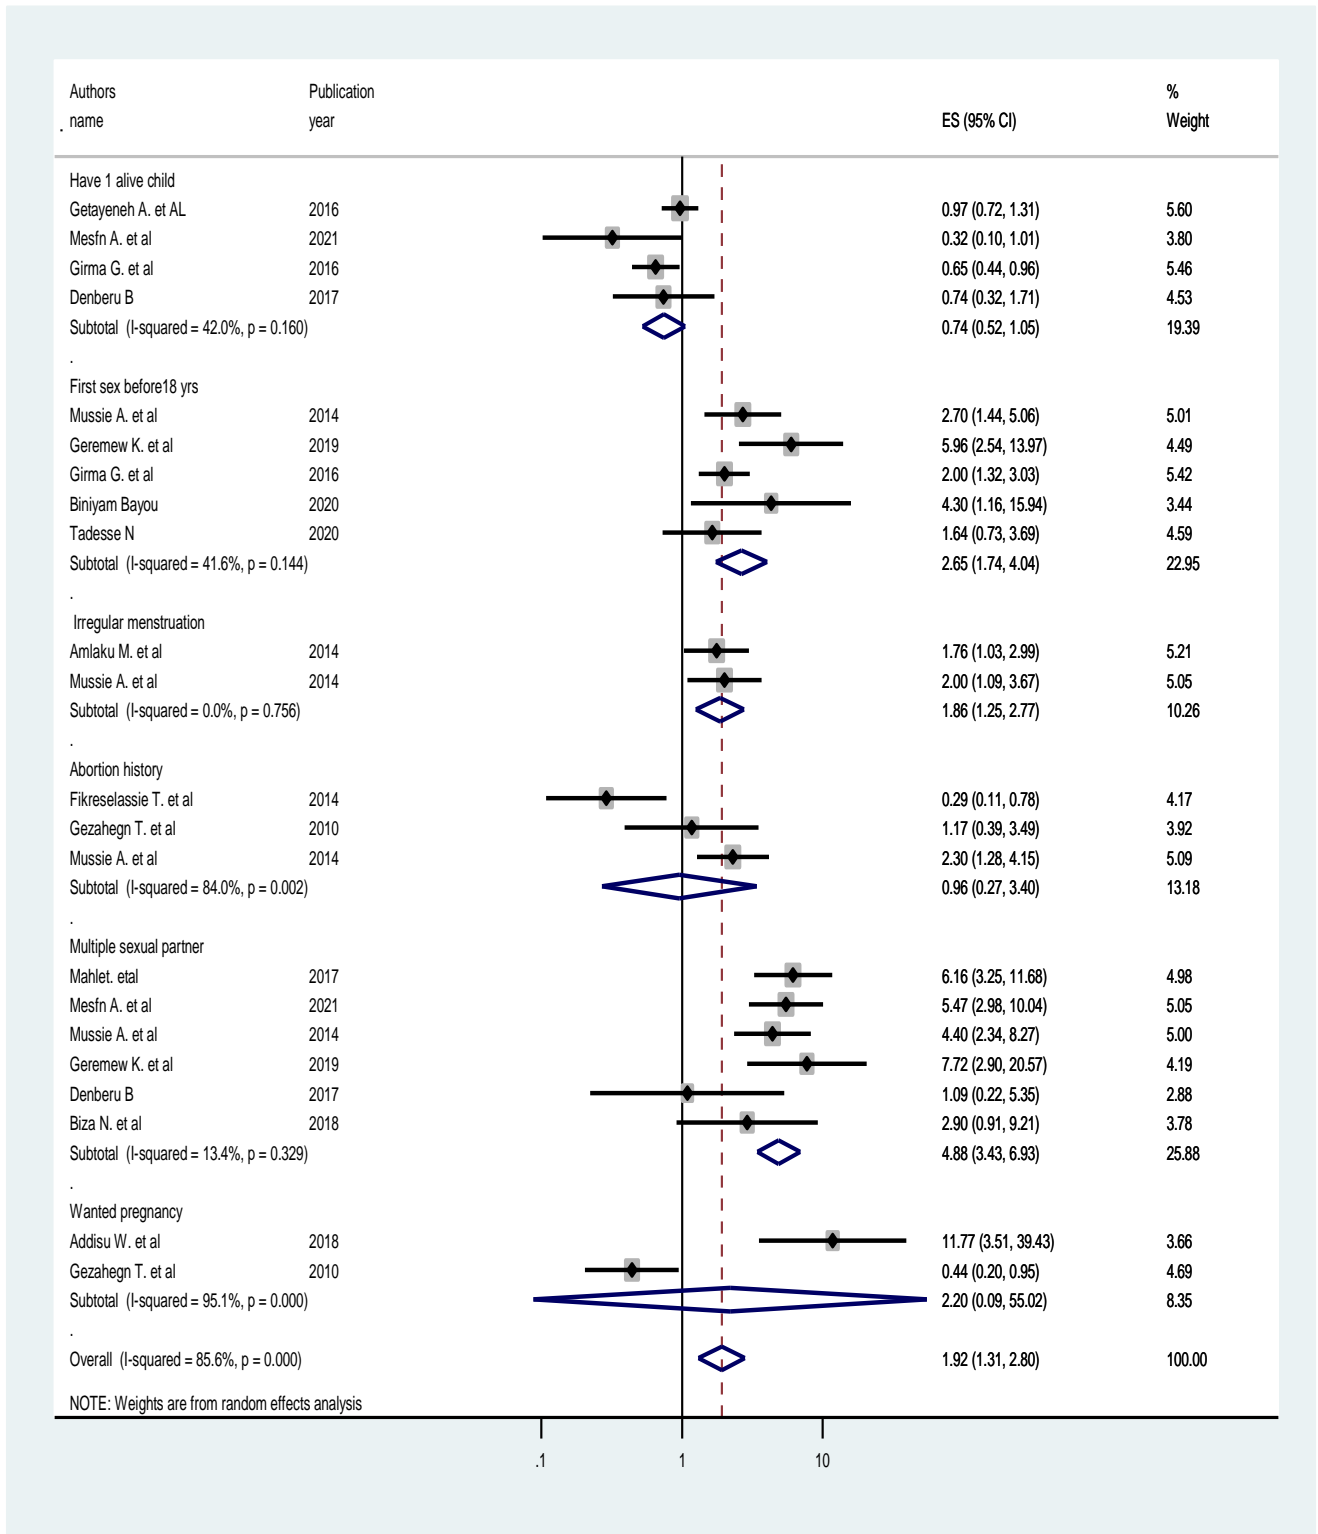

Figure 10: Forest plot of odds ratio for the association of selected reproductive characteristics and pregnancy termination in Ethiopia, 2023

Table 1. Data extraction sheet of the studies

| Authors name            | Publication year | Study area                            | Region        | Study design    | Study setting | Study population               | Sample size |
|-------------------------|------------------|---------------------------------------|---------------|-----------------|---------------|--------------------------------|-------------|
| Addisu W. et al         | 2018             | Addis Ababa                           | Addis Ababa   | Cross-sectional | Institutional | Reproductive age group         | 423         |
| Mahlet T. et al.        | 2017             | Debre Markos                          | Amhara        | Cross-sectional | Institutional | Reproductive age group         | 567         |
| Fikreselassie T. et al. | 2014             | Bahr Dar                              | Amhara        | Case-control    | Institutional | Pregnant women                 | 175         |
| Gezahegn T. et al.      | 2010             | Guraghe Zone                          | SNNP          | Cross-sectional | Institutional | Abortion care service seekers  | 422         |
| Bekele T. et al.        | 2017             | Debre Markos                          | Amhara        | Cross-sectional | Institutional | Abortion care service seekers  | 262         |
| Getayeneh A. et al.     | 2016             | Ethiopia                              | National data | Cross-sectional | Community     | Pregnant women                 | 12378       |
| Addisu T. et al.        | 2019             | Hawassa                               | SNNP          | Cross-sectional | Institutional | University/College students    | 422         |
| Amlaku M. et al.        | 2014             | Amhara region referral hospitals      | Amhara        | Cross-sectional | Institutional | Abortion care service seekers  | 422         |
| Birye D. et al.         | 2019             | Gondar                                | Amhara        | Cross-sectional | Institutional | University/College students    | 648         |
| Amanuel G. et al.       | 2004             | Adigrat                               | Tigray        | Cross-sectional | Institutional | Women with Gynecologic problem | 7203        |
| Endalew S. et al.       | 2021             | Addis Ababa                           | Addis Ababa   | Cross-sectional | Institutional | Reproductive age               | 432         |
| Worku A. et al.         | 2011             | Arba Minch                            | SNNP          | Cross-sectional | Institutional | University/College students    | 845         |
| Mesfn A. et al.         | 2021             | Arba minch & Wolayita Sodo town       | SNNP          | Case control    | Institutional | Reproductive age group         | 413         |
| Bethelihem A. et al.    | 2015             | Addis Ababa                           | Addis Ababa   | Cross-sectional | Institutional | Abortion care service seekers  | 429         |
| Mussie A. et al.        | 2014             | Tigray region health hospitals        | Tigray        | Case control    | Institutional | Abortion care service seekers  | 309         |
| Geremew K. et al.       | 2019             | Debre Berhan town health institutions | Amhara        | Cross-sectional | Institutional | Abortion care service seekers  | 355         |
| Amha A. et al.          | 2011             | Hawassa University                    | SNNP          | Cross-sectional | Institutional | University/College students    | 493         |

|                        |      |                              |               |                 |               |                               |      |
|------------------------|------|------------------------------|---------------|-----------------|---------------|-------------------------------|------|
| Girma G. et al.        | 2016 | Ethiopia                     | National data | Cross-sectional | Community     | Youth women                   | 6401 |
| Kifle L. et al.        | 2017 | Guraghe zone                 | SNNP          | Cross-sectional | Institutional | Reproductive age              | 404  |
| Arif H. et al.         | 2020 | Harari                       | Harari        | Cross-sectional | Institutional | Reproductive age group        | 611  |
| Biniyam B. et al.      | 2020 | Dilla University             | SNNPR         | Cross-sectional | Institutional | University/College students   | 548  |
| Denberu B. et al       | 2017 | Addis Ababa                  | Addis Ababa   | Case control    | Institutional | Youth women                   | 330  |
| Diriba G. et al.       | 2015 | Jimma                        | Oromia        | Cross-sectional | Institutional | Abortion care service seekers | 194  |
| Girum M. et al.        | 2015 | Gonji Kollela District       | Amhara        | Cross-sectional | Community     | Reproductive age group        | 611  |
| Murad M. et al.        | 2020 | Harar                        | Harari        | Cross-sectional | Institutional | Reproductive age group        | 835  |
| Tekleab M. et al.      | 2007 | Ethiopia                     | National data | Cross-sectional | Institutional | Abortion care service seekers | 1075 |
| Tadesse N. et al.      | 2020 | Mizan Tepi University        | SNNP          | Cross-sectional | Institutional | University/College students   | 420  |
| Tesfamichael G. et al. | 2017 | Gondar                       | Amhara        | Cross-sectional | Community     | Reproductive age              | 154  |
| Kidist A. et al        | 2022 | Jimma, Bonga, and Mizan-Aman | SNNPR         | Cross-sectional | Community     | Insecurely housed women       | 124  |
| Solomon W. et al       | 2006 | Harer                        | Harari        | Cross-sectional | Community     | Reproductive age              | 1000 |
| Biza N. et al.         | 2018 | Semera                       | Afar          | Cross-sectional | Institutional | University/College students   | 509  |
| Abera et al.           | 2012 | Mekelle                      | Tigray        | Cross-sectional | Institutional | Abortion care seekers         | 260  |



# PRISMA 2020 Checklist

1  
2  
3  
4  
5  
6  
7  
8  
9  
10  
11  
12  
13  
14  
15  
16  
17  
18  
19  
20  
21  
22  
23  
24  
25  
26  
27  
28  
29  
30  
31  
32  
33  
34  
35  
36  
37  
38  
39  
40  
41  
42  
43  
44  
45  
46  
47

| Section and Topic             | Item # | Checklist item                                                                                                                                                                                                                                                                                       | Location where item is reported |
|-------------------------------|--------|------------------------------------------------------------------------------------------------------------------------------------------------------------------------------------------------------------------------------------------------------------------------------------------------------|---------------------------------|
| <b>TITLE</b>                  |        |                                                                                                                                                                                                                                                                                                      |                                 |
| Title                         | 1      | Identify the report as a systematic review.                                                                                                                                                                                                                                                          | 1                               |
| <b>ABSTRACT</b>               |        |                                                                                                                                                                                                                                                                                                      |                                 |
| Abstract                      | 2      | See the PRISMA 2020 for Abstracts checklist.                                                                                                                                                                                                                                                         | 2                               |
| <b>INTRODUCTION</b>           |        |                                                                                                                                                                                                                                                                                                      |                                 |
| Rationale                     | 3      | Describe the rationale for the review in the context of existing knowledge.                                                                                                                                                                                                                          | 3                               |
| Objectives                    | 4      | Provide an explicit statement of the objective(s) or question(s) the review addresses.                                                                                                                                                                                                               | 3                               |
| <b>METHODS</b>                |        |                                                                                                                                                                                                                                                                                                      |                                 |
| Eligibility criteria          | 5      | Specify the inclusion and exclusion criteria for the review and how studies were grouped for the syntheses.                                                                                                                                                                                          | 4-5                             |
| Information sources           | 6      | Specify all databases, registers, websites, organisations, reference lists and other sources searched or consulted to identify studies. Specify the date when each source was last searched or consulted.                                                                                            | 4                               |
| Search strategy               | 7      | Present the full search strategies for all databases, registers and websites, including any filters and limits used.                                                                                                                                                                                 | 4                               |
| Selection process             | 8      | Specify the methods used to decide whether a study met the inclusion criteria of the review, including how many reviewers screened each record and each report retrieved, whether they worked independently, and if applicable, details of automation tools used in the process.                     | 5                               |
| Data collection process       | 9      | Specify the methods used to collect data from reports, including how many reviewers collected data from each report, whether they worked independently, any processes for obtaining or confirming data from study investigators, and if applicable, details of automation tools used in the process. | 5                               |
| Data items                    | 10a    | List and define all outcomes for which data were sought. Specify whether all results that were compatible with each outcome domain in each study were sought (e.g. for all measures, time points, analyses), and if not, the methods used to decide which results to collect.                        | 5                               |
|                               | 10b    | List and define all other variables for which data were sought (e.g. participant and intervention characteristics, funding sources). Describe any assumptions made about any missing or unclear information.                                                                                         | 5                               |
| Study risk of bias assessment | 11     | Specify the methods used to assess risk of bias in the included studies, including details of the tool(s) used, how many reviewers assessed each study and whether they worked independently, and if applicable, details of automation tools used in the process.                                    | 6                               |
| Effect measures               | 12     | Specify for each outcome the effect measure(s) (e.g. risk ratio, mean difference) used in the synthesis or presentation of results.                                                                                                                                                                  | 6                               |
| Synthesis methods             | 13a    | Describe the processes used to decide which studies were eligible for each synthesis (e.g. tabulating the study intervention characteristics and comparing against the planned groups for each synthesis (item #5)).                                                                                 | 6                               |
|                               | 13b    | Describe any methods required to prepare the data for presentation or synthesis, such as handling of missing summary statistics, or data conversions.                                                                                                                                                | 6                               |
|                               | 13c    | Describe any methods used to tabulate or visually display results of individual studies and syntheses.                                                                                                                                                                                               | 6                               |
|                               | 13d    | Describe any methods used to synthesize results and provide a rationale for the choice(s). If meta-analysis was performed, describe the model(s), method(s) to identify the presence and extent of statistical heterogeneity, and software package(s) used.                                          | 6                               |
|                               | 13e    | Describe any methods used to explore possible causes of heterogeneity among study results (e.g. subgroup analysis, meta-regression).                                                                                                                                                                 | 6                               |
|                               | 13f    | Describe any sensitivity analyses conducted to assess robustness of the synthesized results.                                                                                                                                                                                                         | 6                               |
| Reporting bias assessment     | 14     | Describe any methods used to assess risk of bias due to missing results in a synthesis (arising from reporting biases).                                                                                                                                                                              | 6                               |
| Certainty                     | 15     | Describe any methods used to assess certainty (or confidence) in the body of evidence for an outcome.                                                                                                                                                                                                | 6                               |



## PRISMA 2020 Checklist

| Section and Topic                              | Item # | Checklist item                                                                                                                                                                                                                                                                       | Location where item is reported |
|------------------------------------------------|--------|--------------------------------------------------------------------------------------------------------------------------------------------------------------------------------------------------------------------------------------------------------------------------------------|---------------------------------|
| assessment                                     |        |                                                                                                                                                                                                                                                                                      |                                 |
| <b>RESULTS</b>                                 |        |                                                                                                                                                                                                                                                                                      |                                 |
| Study selection                                | 16a    | Describe the results of the search and selection process, from the number of records identified in the search to the number of studies included in the review, ideally using a flow diagram.                                                                                         | 7                               |
|                                                | 16b    | Cite studies that might appear to meet the inclusion criteria, but which were excluded, and explain why they were excluded.                                                                                                                                                          | 7                               |
| Study characteristics                          | 17     | Cite each included study and present its characteristics.                                                                                                                                                                                                                            | 7                               |
| Risk of bias in studies                        | 18     | Present assessments of risk of bias for each included study.                                                                                                                                                                                                                         | 7                               |
| Results of individual studies                  | 19     | For all outcomes, present, for each study: (a) summary statistics for each group (where appropriate) and (b) an effect estimate and its precision (e.g. confidence/credible interval), ideally using structured tables or plots.                                                     | 7-9                             |
| Results of syntheses                           | 20a    | For each synthesis, briefly summarise the characteristics and risk of bias among contributing studies.                                                                                                                                                                               | 7-9 & 14                        |
|                                                | 20b    | Present results of all statistical syntheses conducted. If meta-analysis was done, present for each the summary estimate and its precision (e.g. confidence/credible interval) and measures of statistical heterogeneity. If comparing groups, describe the direction of the effect. | 7-9 & 14                        |
|                                                | 20c    | Present results of all investigations of possible causes of heterogeneity among study results.                                                                                                                                                                                       | 7-9 & 14                        |
|                                                | 20d    | Present results of all sensitivity analyses conducted to assess the robustness of the synthesized results.                                                                                                                                                                           | 7-9 & 14                        |
| Reporting biases                               | 21     | Present assessments of risk of bias due to missing results (arising from reporting biases) for each synthesis assessed.                                                                                                                                                              | 7-9                             |
| Certainty of evidence                          | 22     | Present assessments of certainty (or confidence) in the body of evidence for each outcome assessed.                                                                                                                                                                                  | 7-9                             |
| <b>DISCUSSION</b>                              |        |                                                                                                                                                                                                                                                                                      |                                 |
| Discussion                                     | 23a    | Provide a general interpretation of the results in the context of other evidence.                                                                                                                                                                                                    | 11-13                           |
|                                                | 23b    | Discuss any limitations of the evidence included in the review.                                                                                                                                                                                                                      | 11-13                           |
|                                                | 23c    | Discuss any limitations of the review processes used.                                                                                                                                                                                                                                | 13                              |
|                                                | 23d    | Discuss implications of the results for practice, policy, and future research.                                                                                                                                                                                                       | 11-13                           |
| <b>OTHER INFORMATION</b>                       |        |                                                                                                                                                                                                                                                                                      |                                 |
| Registration and protocol                      | 24a    | Provide registration information for the review, including register name and registration number, or state that the review was not registered.                                                                                                                                       | 5                               |
|                                                | 24b    | Indicate where the review protocol can be accessed, or state that a protocol was not prepared.                                                                                                                                                                                       | 5                               |
|                                                | 24c    | Describe and explain any amendments to information provided at registration or in the protocol.                                                                                                                                                                                      | 5                               |
| Support                                        | 25     | Describe sources of financial or non-financial support for the review, and the role of the funders or sponsors in the review.                                                                                                                                                        | 14                              |
| Competing interests                            | 26     | Declare any competing interests of review authors.                                                                                                                                                                                                                                   | 14                              |
| Availability of data, code and other materials | 27     | Report which of the following are publicly available and where they can be found: template data collection forms; data extracted from included studies; data used for all analyses; analytic code; any other materials used in the review.                                           | 14                              |



## PRISMA 2020 Checklist

- 1
- 2
- 3
- 4
- 5
- 6
- 7
- 8
- 9
- 10
- 11
- 12
- 13
- 14
- 15
- 16
- 17
- 18
- 19
- 20
- 21
- 22
- 23
- 24
- 25
- 26
- 27
- 28
- 29
- 30
- 31
- 32
- 33
- 34
- 35
- 36
- 37
- 38
- 39
- 40
- 41
- 42
- 43
- 44
- 45
- 46
- 47

10.1136/bmj.n71

For more information, visit: <http://www.prisma-statement.org/>

For peer review only
