# Supplementary material for: Prevalence and determinants of pregnancy termination in Ethiopia: a systematic review and meta-analysis
Source: PubMed Central journal article supplement — BMJ Open. 2024 Mar 13;14(3):e073799. doi: 10.1136/bmjopen-2023-073799 (PMC10941161; doi:10.1136/bmjopen-2023-073799), 2024-03-13
Supplement: bmjopen-2023-073799supp001.pdf [file bmjopen-2023-073799supp001.pdf]

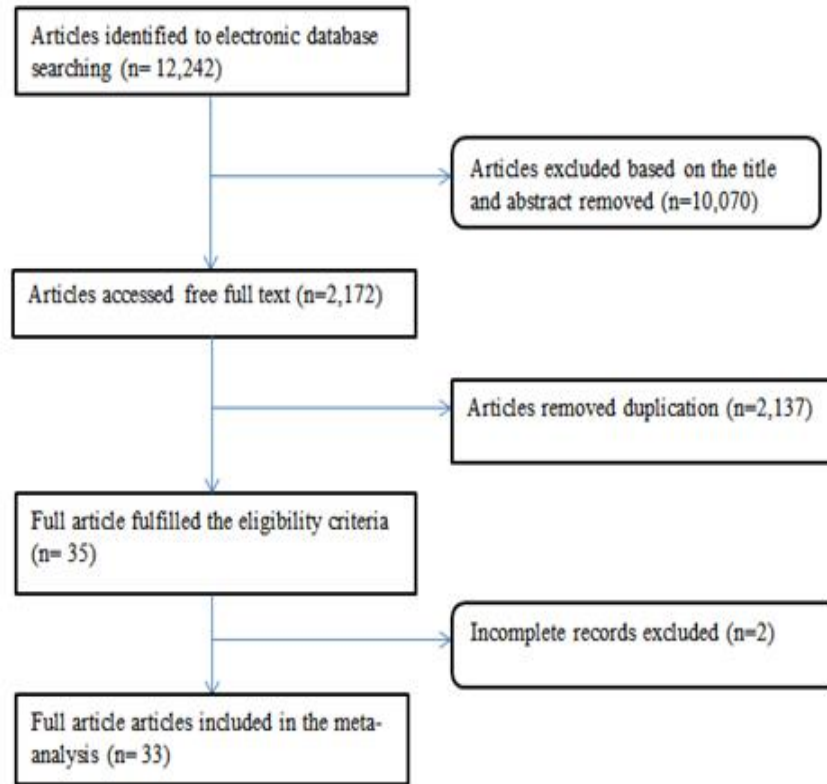

Figure1. Flow chart of describing the selection of studies for the systematic review and meta-analysis of the prevalence of pregnancy termination and associated factors in Ethiopia, 2023

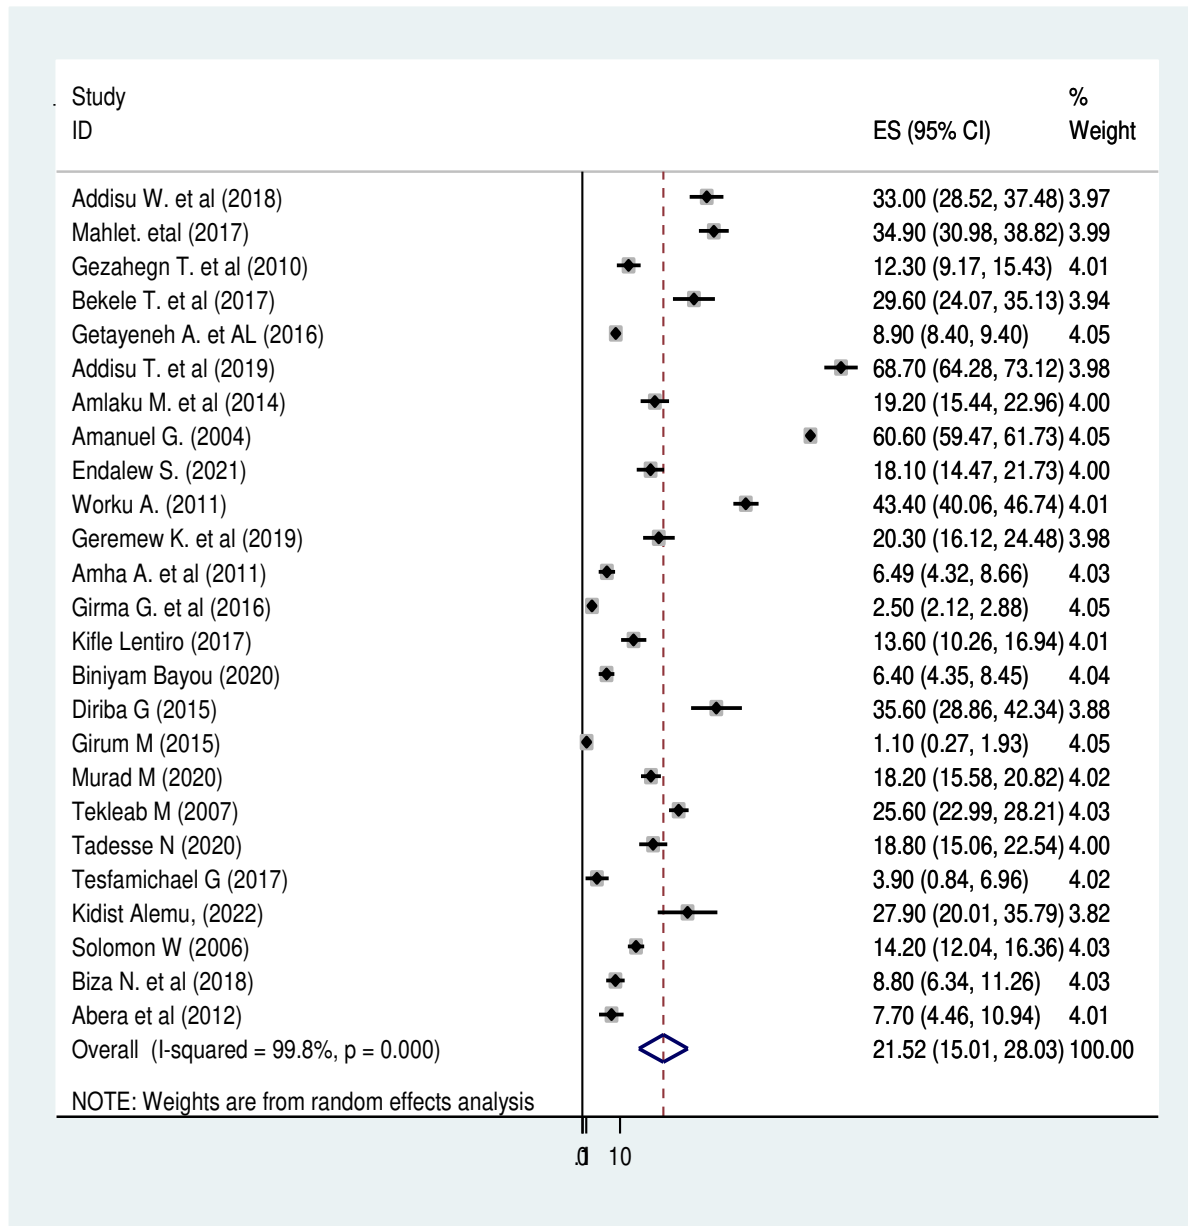

Figure 2: Forest plot of the pooled prevalence of pregnancy termination in Ethiopia, 2023

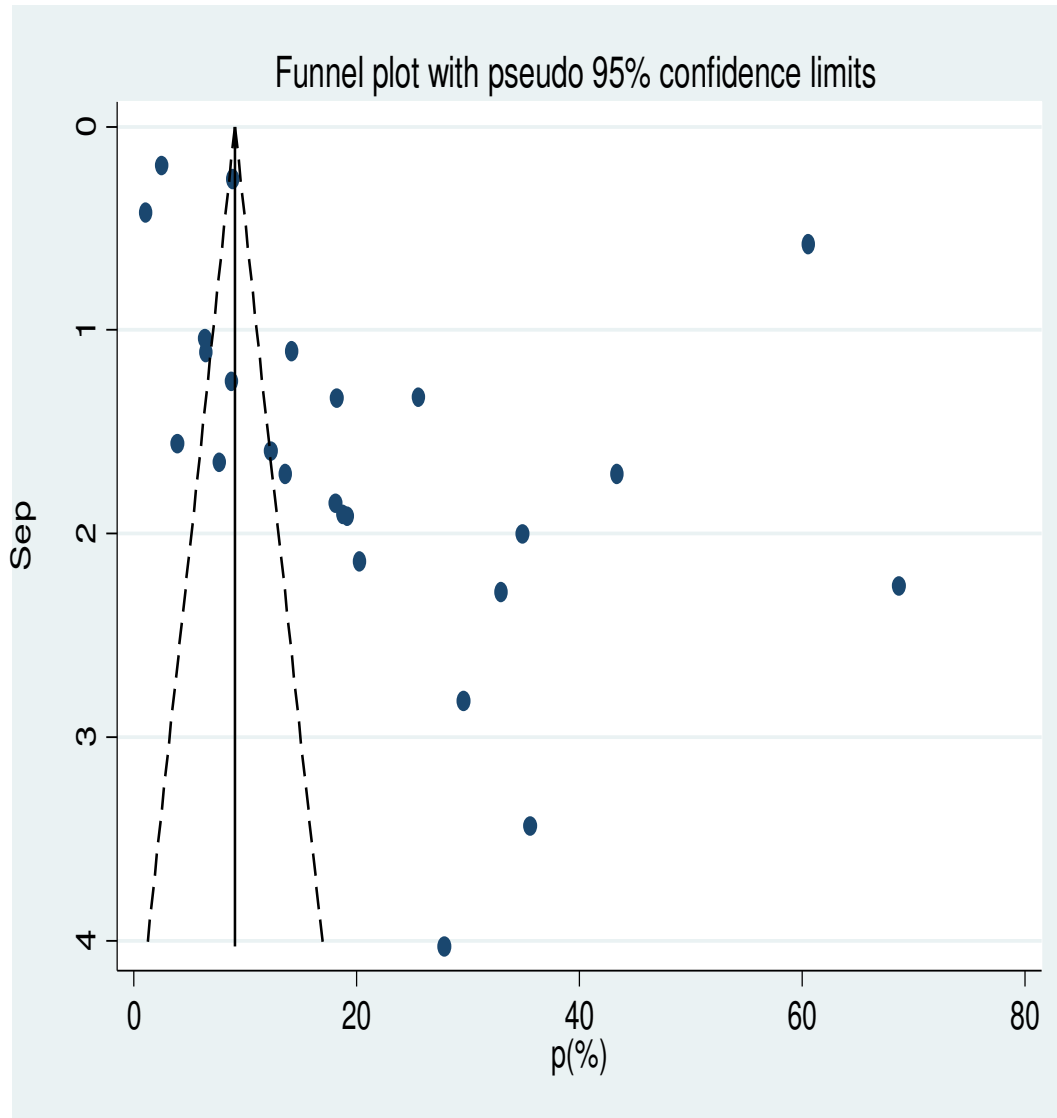

Figure 3: Funnel plot to test publication bias of pregnancy termination in Ethiopia, 2023

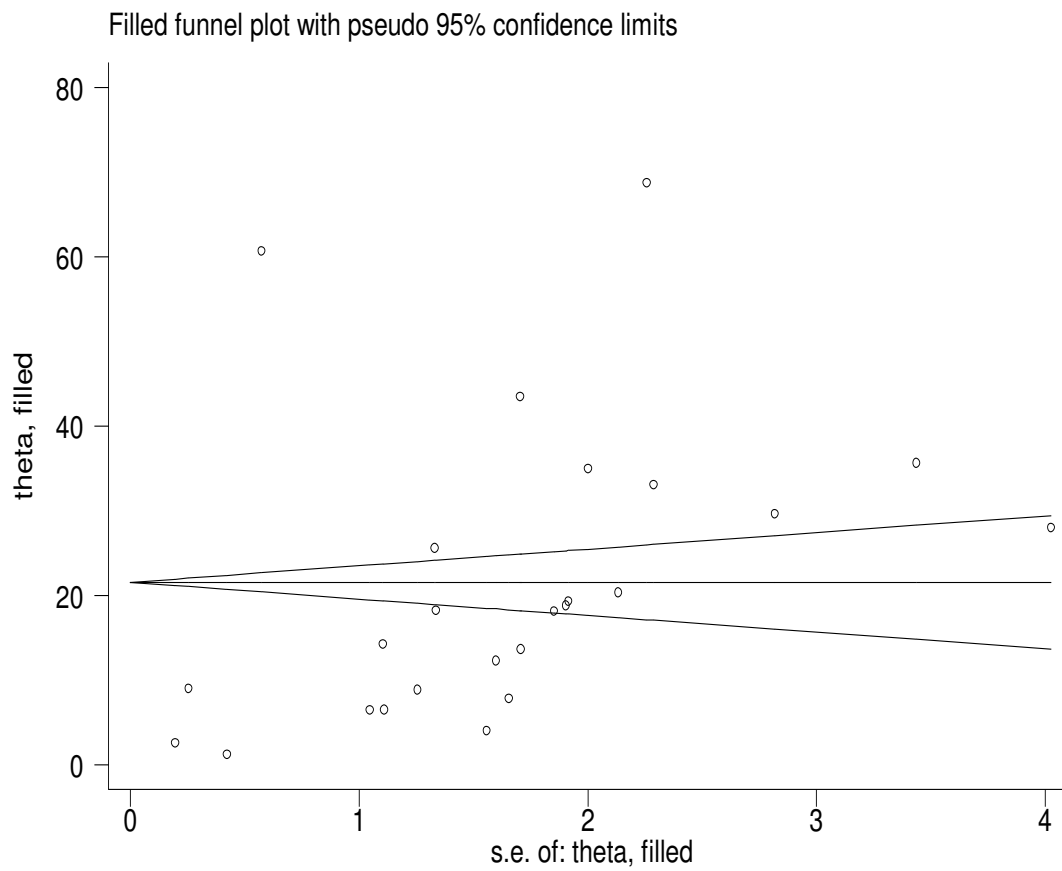

Figure 4: The Duval and Tweedie nonparametric trim and fill analysis of abortion among women in Ethiopia, 2023

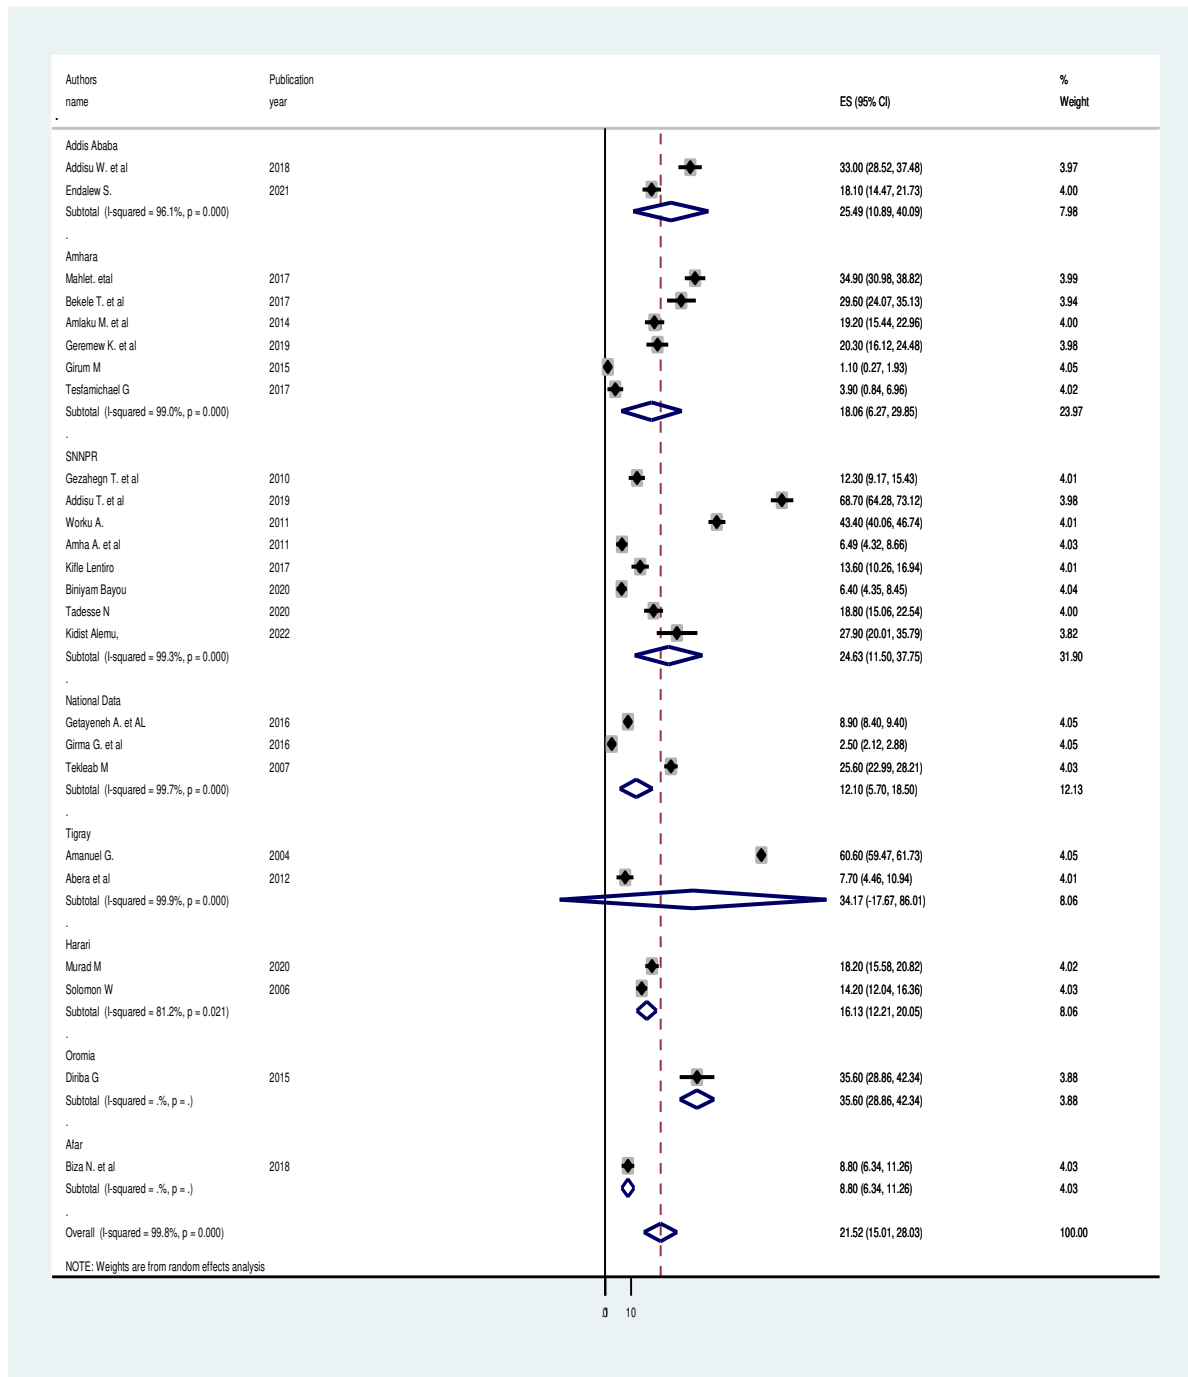

Figure 5: Subgroup analysis of the pregnancy termination based on regional distribution in Ethiopia, 2023

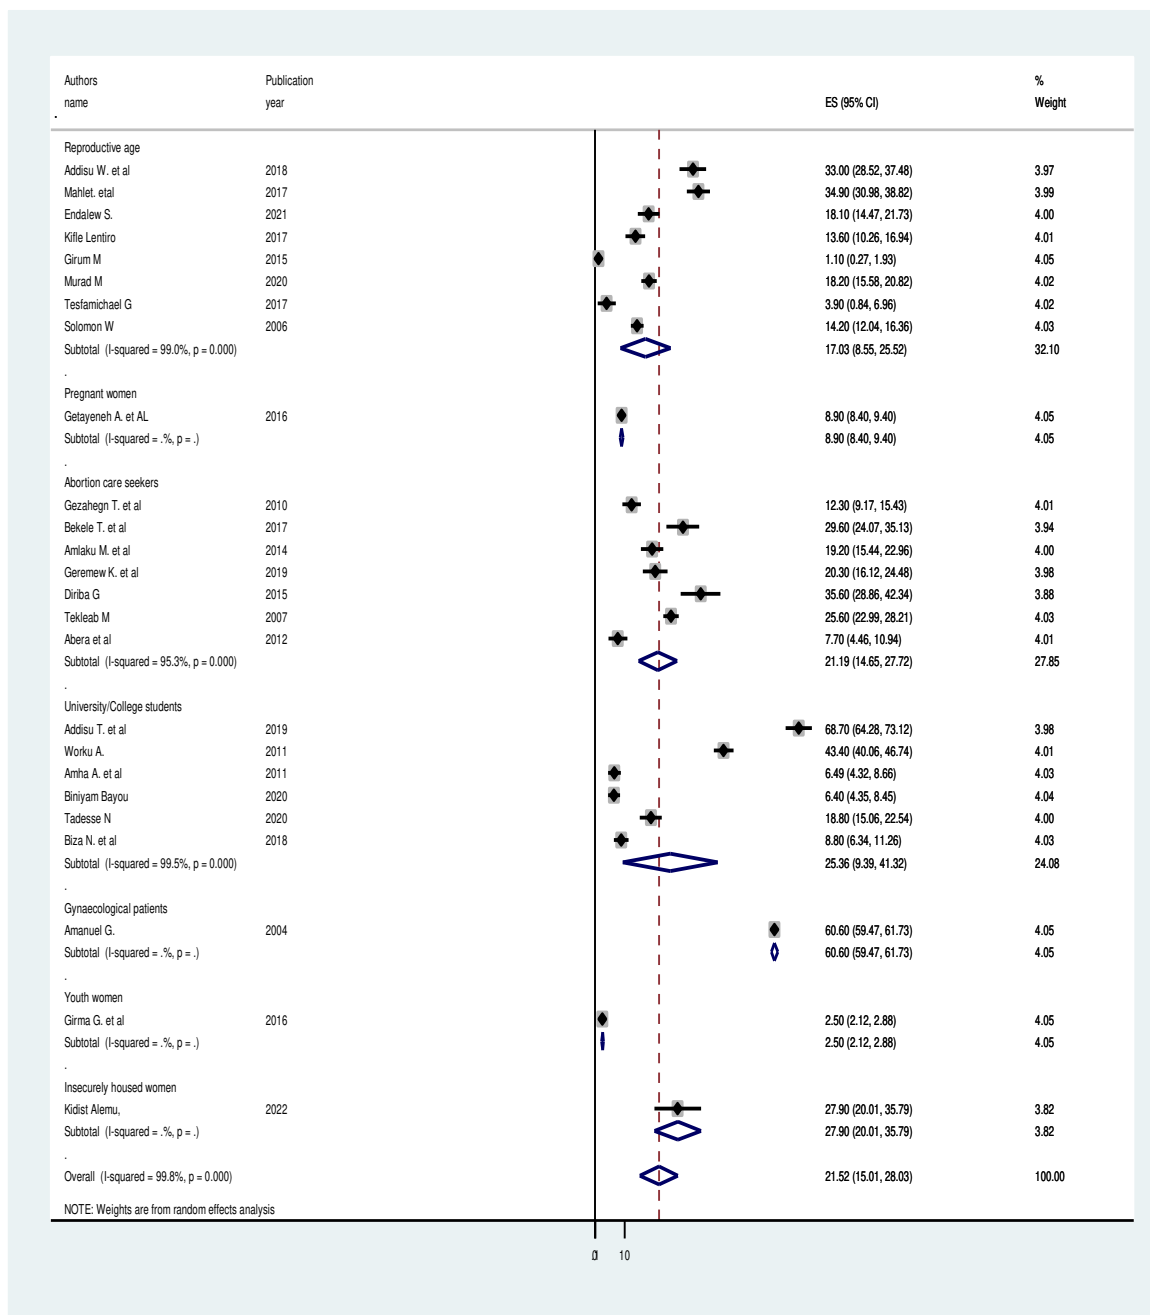

Figure 6: Subgroup analysis of the prevalence of pregnancy termination based on study population in Ethiopia, 2022

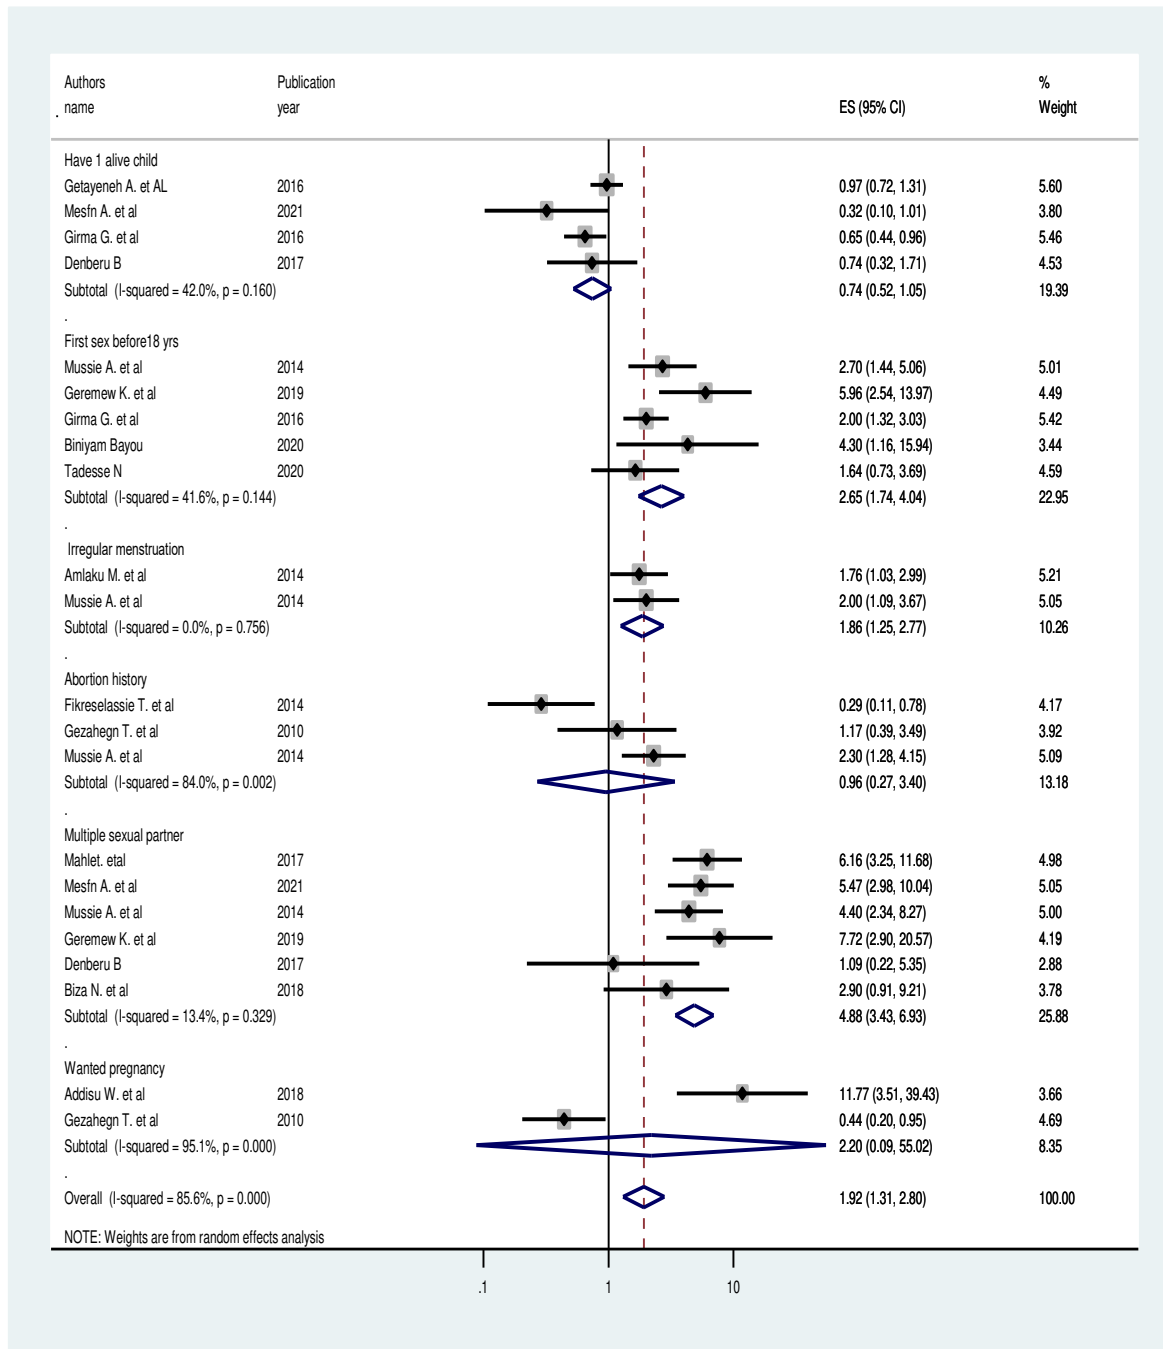

Figure 7: Subgroup analysis of the prevalence of pregnancy termination based on before and after MDG in Ethiopia, 2023

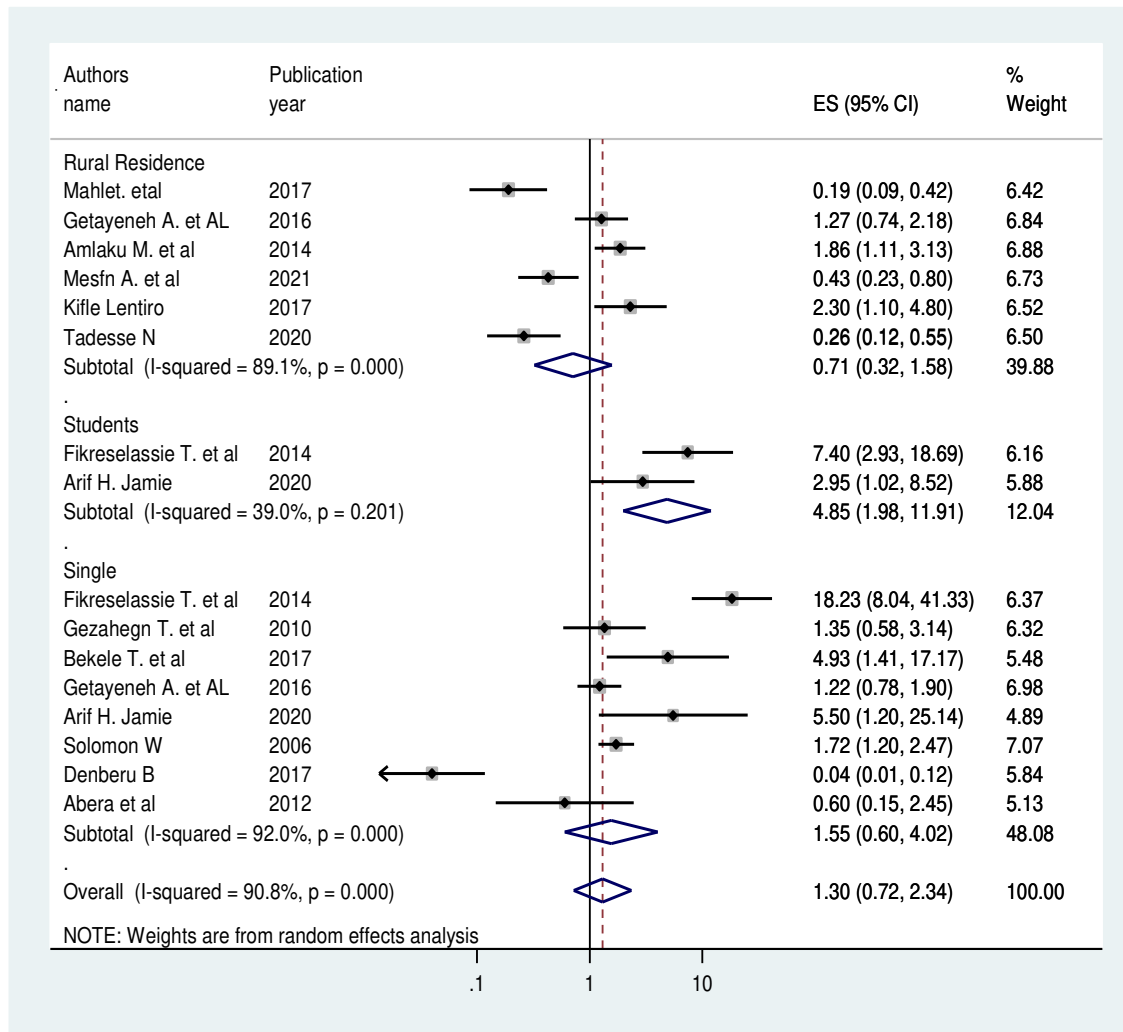

Figure 8: Forest plot of odds ratio for the association of selected socio-demographic characteristics and pregnancy termination in Ethiopia, 2023



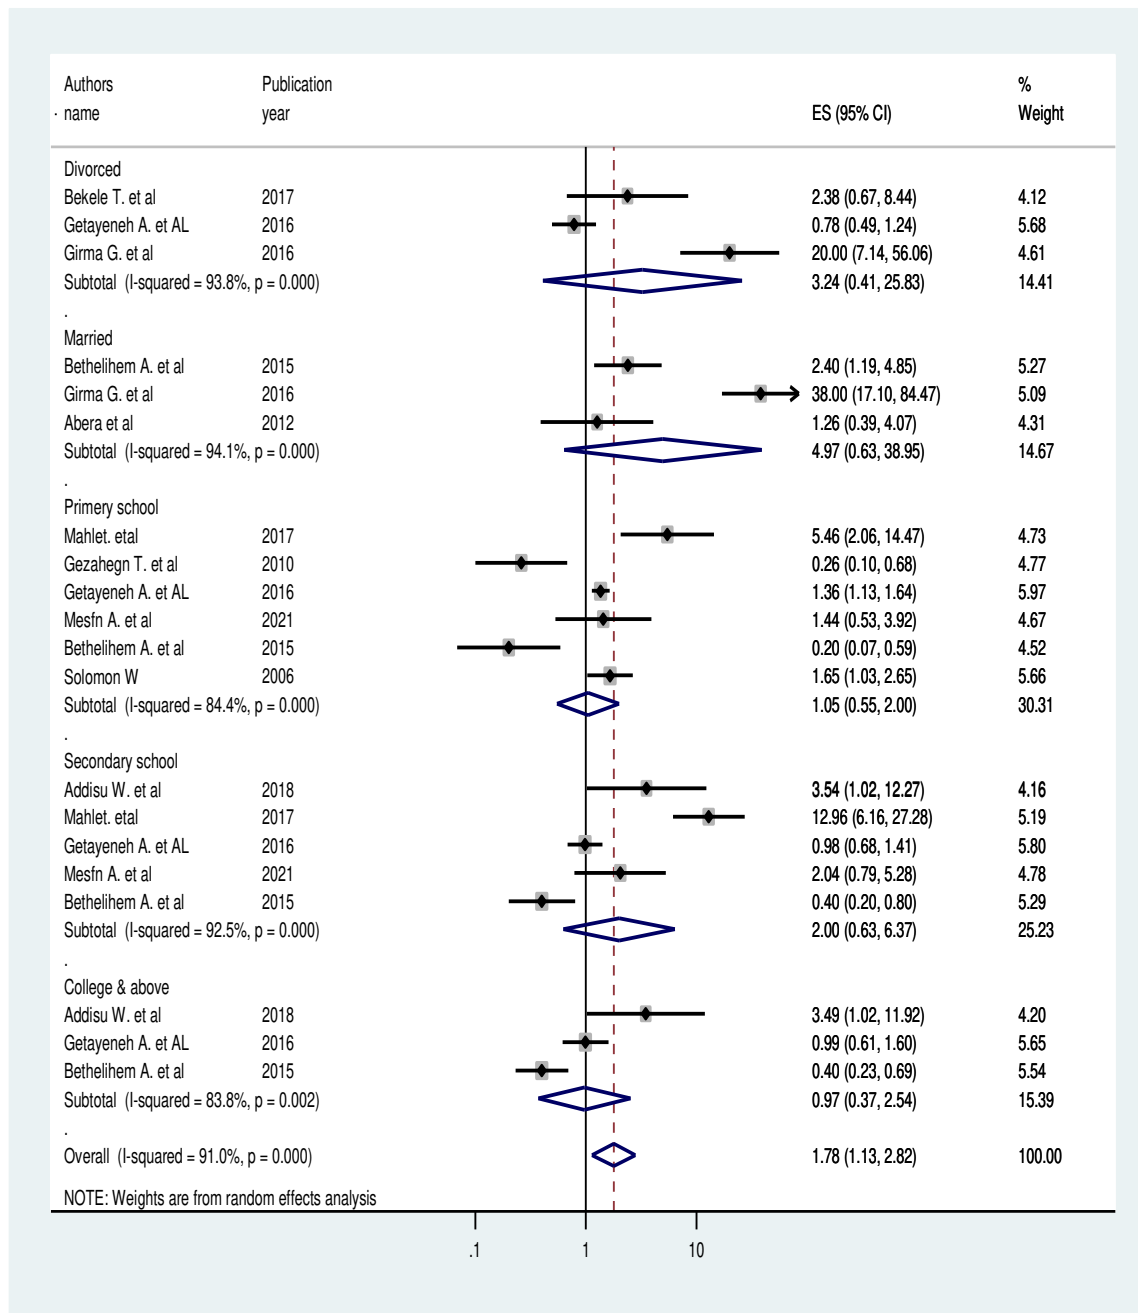

Figure 9: Forest plot of odds ratio for the association of selected socio-demographic characteristics and pregnancy termination in Ethiopia, 2023

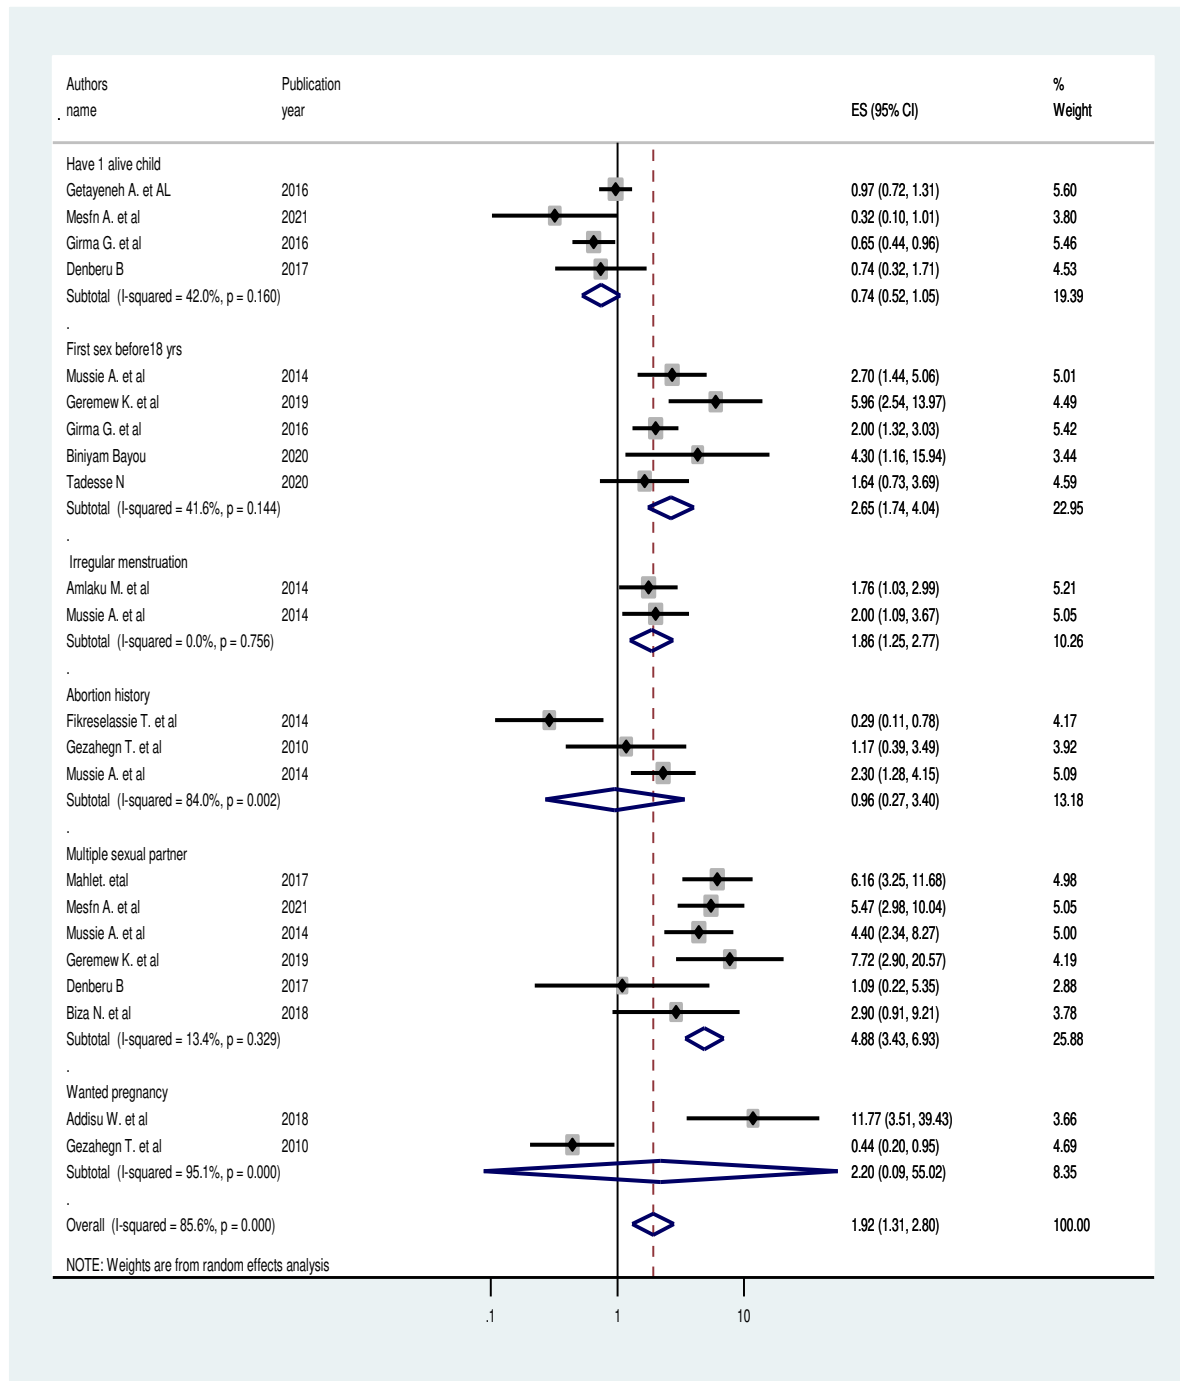

Figure 10: Forest plot of odds ratio for the association of selected reproductive characteristics and pregnancy termination in Ethiopia, 2023

Table 1. Data extraction sheet of the studies

| Authors name          | Publication year | Study area                            | Region        | Study design    | Study setting | Study population               | Sample size |
|-----------------------|------------------|---------------------------------------|---------------|-----------------|---------------|--------------------------------|-------------|
| Addisu W. et al       | 2018             | Addis Ababa                           | Addis Ababa   | Cross-sectional | Institutional | Reproductive age group         | 423         |
| Mahlet T. et al.      | 2017             | Debre Markos                          | Amhara        | Cross-sectional | Institutional | Reproductive age group         | 567         |
| Fikrelassie T. et al. | 2014             | Bahr Dar                              | Amhara        | Case-control    | Institutional | Pregnant women                 | 175         |
| Gezahegn T. et al.    | 2010             | Guraghe Zone                          | SNNP          | Cross-sectional | Institutional | Abortion care service seekers  | 422         |
| Bekele T. et al.      | 2017             | Debre Markos                          | Amhara        | Cross-sectional | Institutional | Abortion care service seekers  | 262         |
| Getayeneh A. et al.   | 2016             | Ethiopia                              | National data | Cross-sectional | Community     | Pregnant women                 | 12378       |
| Addisu T. et al.      | 2019             | Hawassa                               | SNNP          | Cross-sectional | Institutional | University/College students    | 422         |
| Amlaku M. et al.      | 2014             | Amhara region referral hospitals      | Amhara        | Cross-sectional | Institutional | Abortion care service seekers  | 422         |
| Birye D. et al.       | 2019             | Gondar                                | Amhara        | Cross-sectional | Institutional | University/College students    | 648         |
| Amanuel G. et al.     | 2004             | Adigrat                               | Tigray        | Cross-sectional | Institutional | Women with Gynecologic problem | 7203        |
| Endalew S. et al.     | 2021             | Addis Ababa                           | Addis Ababa   | Cross-sectional | Institutional | Reproductive age               | 432         |
| Worku A. et al.       | 2011             | Arba Minch                            | SNNP          | Cross-sectional | Institutional | University/College students    | 845         |
| Mesfn A. et al.       | 2021             | Arba minch & Wolayita Sodo town       | SNNP          | Case control    | Institutional | Reproductive age group         | 413         |
| Bethelihem A. et al.  | 2015             | Addis Ababa                           | Addis Ababa   | Cross-sectional | Institutional | Abortion care service seekers  | 429         |
| Mussie A. et al.      | 2014             | Tigray region health hospitals        | Tigray        | Case control    | Institutional | Abortion care service seekers  | 309         |
| Geremew K. et al.     | 2019             | Debre Berhan town health institutions | Amhara        | Cross-sectional | Institutional | Abortion care service seekers  | 355         |
| Amha A. et al.        | 2011             | Hawassa University                    | SNNP          | Cross-sectional | Institutional | University/College students    | 493         |

|                        |      |                              |               |                 |               |                               |      |
|------------------------|------|------------------------------|---------------|-----------------|---------------|-------------------------------|------|
| Girma G. et al.        | 2016 | Ethiopia                     | National data | Cross-sectional | Community     | Youth women                   | 6401 |
| Kifle L. et al.        | 2017 | Guraghe zone                 | SNNP          | Cross-sectional | Institutional | Reproductive age              | 404  |
| Arif H. et al.         | 2020 | Harari                       | Harari        | Cross-sectional | Institutional | Reproductive age group        | 611  |
| Biniyam B. et al.      | 2020 | Dilla University             | SNNPR         | Cross-sectional | Institutional | University/College students   | 548  |
| Denberu B. et al.      | 2017 | Addis Ababa                  | Addis Ababa   | Case control    | Institutional | Youth women                   | 330  |
| Diriba G. et al.       | 2015 | Jimma                        | Oromia        | Cross-sectional | Institutional | Abortion care service seekers | 194  |
| Girum M. et al.        | 2015 | Gonji Kollela District       | Amhara        | Cross-sectional | Community     | Reproductive age group        | 611  |
| Murad M. et al.        | 2020 | Harar                        | Harari        | Cross-sectional | Institutional | Reproductive age group        | 835  |
| Tekleab M. et al.      | 2007 | Ethiopia                     | National data | Cross-sectional | Institutional | Abortion care service seekers | 1075 |
| Tadesse N. et al.      | 2020 | Mizan Tepi University        | SNNP          | Cross-sectional | Institutional | University/College students   | 420  |
| Tesfamichael G. et al. | 2017 | Gondar                       | Amhara        | Cross-sectional | Community     | Reproductive age              | 154  |
| Kidist A. et al.       | 2022 | Jimma, Bonga, and Mizan-Aman | SNNPR         | Cross-sectional | Community     | Insecurely housed women       | 124  |
| Solomon W. et al.      | 2006 | Harer                        | Harari        | Cross-sectional | Community     | Reproductive age              | 1000 |
| Biza N. et al.         | 2018 | Semera                       | Afar          | Cross-sectional | Institutional | University/College students   | 509  |
| Abera et al.           | 2012 | Mekelle                      | Tigray        | Cross-sectional | Institutional | Abortion care seekers         | 260  |
